# Supplementary material for: LCN2 secreted by tissue-infiltrating neutrophils induces the ferroptosis and wasting of adipose and muscle tissues in lung cancer cachexia
Source: Springer Nature journal article supplement (doi:10.1186/s13045-023-01429-1), 2023-03-27
Supplement: MOESM2 [file 24738850]

| Table S3 human serum proteomics (cachexia tumor patients VS non cachexia tumor patient) |             |             |             |           |             |          |           |             |           |           |               |               |               |
|-----------------------------------------------------------------------------------------|-------------|-------------|-------------|-----------|-------------|----------|-----------|-------------|-----------|-----------|---------------|---------------|---------------|
| proteinID                                                                               | AveExp.CA   | AveExp.NC   | P Value     | adj.P.Val | foldchange  | entrezID | uniprotID | Cachexia1   | Cachexia2 | Cachexia3 | non cachexia1 | non cachexia2 | non cachexia3 |
| TNF R1                                                                                  | 15.26443842 | 13.47364913 | 3.16E-05    | 0.0069472 | 3.460041378 | 7132     | P19438    | 11683.8896  | 33454.153 | 37658.412 | 9576.438761   | 11005.99018   | 13962.67255   |
| MMP-8                                                                                   | 13.98572821 | 11.34876599 | 2.86E-05    | 0.0069472 | 6.220198526 | 4137     | P22894    | 12674.4471  | 14095.52  | 21758.251 | 2990.2646     | 2743.790322   | 2159.763318   |
| IL-18                                                                                   | 15.03502206 | 11.41850492 | 0.000330424 | 0.0363467 | 12.26535542 | 3606     | Q14116    | 50455.0063  | 15704.466 | 91400.222 | 3284.704761   | 1770.584485   | 3522.279166   |
| Pentraxin 3                                                                             | 14.29749089 | 12.55276248 | 0.000279255 | 0.0363467 | 3.351317593 | 5806     | P26022    | 13675.7639  | 21042.08  | 21764.035 | 5750.018149   | 7894.982384   | 4775.647556   |
| Lipocalin-2                                                                             | 15.12720454 | 9.88706199  | 0.000431874 | 0.0671349 | 1.536469392 | 3934     | P80188    | 64134.3917  | 61388.23  | 71543.11  | 39891.29675   | 35080.88296   | 32752.29631   |
| LAP(TGFb1)                                                                              | 15.14955079 | 12.31533048 | 0.001149872 | 0.084324  | 7.131572931 | 7040     | P01137    | 24050.8214  | 35513.402 | 42246.126 | 14417.50232   | 2219.828552   | 4133.437774   |
| B7-H3                                                                                   | 14.52852925 | 13.38832767 | 0.000998612 | 0.084324  | 2.20411818  | 80381    | Q5ZPR3    | 21609.9965  | 24562.972 | 22251.249 | 7340.807063   | 11463.33454   | 14644.7914    |
| BLC                                                                                     | 13.89234015 | 10.3104877  | 0.001606654 | 0.1009897 | 11.9741592  | 10563    | Q43927    | 38878.2307  | 9962.2958 | 3491.2904 | 1284.558942   | 1311.843314   | 1212.37016    |
| Flt-3L                                                                                  | 10.15612848 | 11.6336628  | 0.003566764 | 0.1234871 | 0.359102023 | 2322     | P36888    | 1139.70461  | 728.9301  | 1938.4534 | 4619.455422   | 2654.336113   | 2613.809776   |
| TRAIL R3                                                                                | 13.85005404 | 13.06655887 | 0.003164851 | 0.1234871 | 1.721295955 | 8794     | Q14798    | 18048.5871  | 11472.655 | 13828.643 | 7971.07083    | 9145.896841   | 8657.318399   |
| uPAR                                                                                    | 13.72706431 | 12.15269213 | 0.003839063 | 0.1234871 | 2.978058676 | 5329     | Q03405    | 18928.4543  | 6501.1672 | 18124.508 | 5041.045484   | 3787.734689   | 4940.668674   |
| GDF-15                                                                                  | 16.89084564 | 15.87914139 | 0.002996798 | 0.1234871 | 2.016291528 | 9518     | Q99988    | 129361.845  | 121605.55 | 137109.82 | 72643.96258   | 50136.5258    | 60106.01867   |
| GRO                                                                                     | 12.36534626 | 11.1697951  | 0.002805019 | 0.1234871 | 2.290323137 | 2919     | Q09341    | 4168.31168  | 4199.4228 | 7093.1741 | 2789.267142   | 1591.573433   | 2750.597228   |
| MIF                                                                                     | 13.13562342 | 11.69503351 | 0.003024111 | 0.1234871 | 2.714318294 | 4283     | Q07325    | 6677.85723  | 6299.5218 | 9483.1914 | 4052.781899   | 2541.604054   | 3535.132665   |
| MIP-3b                                                                                  | 10.34170119 | 12.97804663 | 0.003929134 | 0.1234871 | 0.209336612 | 6363     | Q99731    | 953.20515   | 807.45709 | 3899.1626 | 8007.360702   | 7325.603972   | 4058.802197   |
| IL-33                                                                                   | 8.761153382 | 11.48161315 | 0.005089634 | 0.1492959 | 0.511726    | 90865    | Q95760    | 235.487664  | 391.2783  | 623.06777 | 4299.532827   | 6062.7561     | 895.7386285   |
| HGF                                                                                     | 12.46029172 | 10.82107277 | 0.006381033 | 0.1651561 | 3.114970595 | 3082     | P14210    | 2686.88882  | 4236.5783 | 12189.073 | 1968.257209   | 1566.572995   | 197.104443    |
| TSPL                                                                                    | 8.215403435 | 11.792055   | 0.006261377 | 0.1651561 | 0.083814777 | 85480    | Q969D9    | 141.873467  | 101.5458  | 1675.1967 | 4076.108534   | 8545.338359   | 1278.836361   |
| PDGF-AA                                                                                 | 14.36274462 | 12.55488846 | 0.007243804 | 0.1766072 | 3.501216231 | 5154     | P04085    | 11372.9699  | 15363.817 | 36565.897 | 6006.932326   | 3372.232781   | 10749.35268   |
| VEGF R3                                                                                 | 11.40403815 | 10.16314254 | 0.009687019 | 0.1766072 | 2.363452066 | 2324     | P35916    | 3491.93341  | 3378.975  | 2455.3885 | 963.929975    | 1022.76016    | 1524.942758   |
| I-TAC                                                                                   | 9.267522896 | 8.457966595 | 0.010034501 | 0.1766072 | 1.752672238 | 6373     | Q14625    | 516.742385  | 616.25125 | 915.84899 | 403.4215801   | 327.2849839   | 326.5062578   |
| Neprilysin                                                                              | 9.704433269 | 11.87233647 | 0.009297776 | 0.1766072 | 0.222533863 | 4311     | P08473    | 1236.67402  | 435.59861 | 894.38202 | 4406.749713   | 9710.122015   | 1230.12416    |
| Syndecan-1                                                                              | 14.47821993 | 13.42179097 | 0.007735655 | 0.1766072 | 2.079777269 | 6382     | P18827    | 2451.71419  | 18352.147 | 23785.978 | 7258.729207   | 10774.95738   | 16892.07383   |
| LRP-6                                                                                   | 10.60449617 | 12.786993   | 0.008433324 | 0.1766072 | 0.220294162 | 4040     | Q07581    | 833.802331  | 970.25875 | 4276.9792 | 8472.781733   | 11143.48845   | 3737.246439   |
| BMPR-IB                                                                                 | 2.113807939 | 9.24443721  | 0.008827019 | 0.1766072 | 0.007136212 | 658      | O00238    | 349.9976774 | 0         | 0         | 587.9986206   | 915.5486469   | 412.3193428   |
| CD48                                                                                    | 1.899169963 | 10.10315011 | 0.009609777 | 0.1766072 | 0.003391219 | 962      | P09326    | 0           | 0         | 192.56575 | 0             | 1687.32225    | 630.1220671   |
| Follistatin                                                                             | 12.88956997 | 12.2587075  | 0.010940397 | 0.1782879 | 1.548490435 | 10468    | P19883    | 8161.71704  | 8678.1773 | 8257.1638 | 4678.770709   | 4479.718103   | 5241.337727   |
| TIMP-4                                                                                  | 13.9480065  | 12.29788845 | 0.010929797 | 0.1782879 | 3.138593205 | 7079     | Q09727    | 8879.34463  | 17305.617 | 18518.32  | 3318.016783   | 3437.192155   | 11187.20267   |
| IP-10                                                                                   | 11.82388221 | 10.78118182 | 0.013473398 | 0.2117248 | 2.060080029 | 3627     | Q02778    | 3799.32532  | 3276.5963 | 4697.3074 | 2057.096418   | 1087.85674    | 2430.872999   |
| LOX-1                                                                                   | 12.68297588 | 11.73321094 | 0.01454447  | 0.2206747 | 3.863115826 | 4973     | P78380    | 2319.22609  | 4862.2598 | 15293.137 | 2061.549989   | 1642.801616   | 1453.793806   |
| HVEM                                                                                    | 12.95358126 | 10.593868   | 0.01705938  | 0.2274605 | 1.762520795 | 8764     | Q92956    | 11704.7927  | 5831.191  | 7913.9329 | 5653.476678   | 4052.058457   | 3977.402494   |
| AgRP                                                                                    | 11.44612115 | 12.35492774 | 0.016981913 | 0.2274605 | 1.803929711 | 181      | O00253    | 4755.23874  | 1894.4504 | 2704.9048 | 1609.007283   | 1668.209313   | 1375.684367   |
| MMP-3                                                                                   | 13.32473957 | 11.53342118 | 0.016755281 | 0.2274605 | 3.461309072 | 4314     | P08254    | 15630.9245  | 10525.03  | 13878.785 | 5154.848168   | 4445.026356   | 1135.175936   |
| DL1                                                                                     | 9.1384091   | 7.88570911  | 0.015812916 | 0.2274605 | 2.382871557 | 28514    | O00548    | 771.115034  | 369.52381 | 1061.2699 | 195.563474    | 265.6750661   | 65.750661     |
| IL-1ra                                                                                  | 13.18148762 | 11.91198449 | 0.018023516 | 0.2323455 | 2.410785219 | 3557     | P18510    | 4400.35726  | 9272.9468 | 19822.254 | 4108.56303    | 3542.626376   | 3928.618149   |
| RAGE                                                                                    | 13.98433187 | 14.77888557 | 0.0190772   | 0.2398277 | 0.576521491 | 177      | Q15109    | 2121.0136   | 17258.132 | 13724.88  | 28429.57277   | 31566.41873   | 24752.63024   |
| IL-31                                                                                   | 8.805925201 | 11.090298   | 0.019627444 | 0.239891  | 0.205274624 | 386653   | Q6EBC2    | 279.882901  | 354.37677 | 1236.2529 | 3750.079698   | 3397.410864   | 812.0268762   |
| IL-17F                                                                                  | 9.029556223 | 11.38597888 | 0.020274957 | 0.2411076 | 0.195274754 | 112744   | Q96PD4    | 252.950011  | 320.59276 | 1202.589  | 3915.746416   | 6896.601      | 708.4798249   |
| 4-1BB                                                                                   | 9.881485444 | 12.18499383 | 0.031963485 | 0.2546096 | 0.202569884 | 3604     | Q07011    | 319.199753  | 712.56789 | 1785.8356 | 3139.285461   | 17067.7957    | 1882.535955   |
| GM-CSF                                                                                  | 11.27616108 | 10.03187524 | 0.033616412 | 0.2546096 | 2.369012552 | 1437     | Q04141    | 1024.99508  | 2014.5675 | 4362.3129 | 1033.169286   | 862.2952477   | 1284.094577   |
| IFN-g                                                                                   | 11.69554221 | 10.51322181 | 0.034816281 | 0.2546096 | 2.26941492  | 3458     | P01579    | 1516.7875   | 2466.8408 | 6276.402  | 1423.094537   | 1298.13318    | 1686.30212    |
| IL-1b                                                                                   | 9.40360721  | 8.58302259  | 0.031234376 | 0.2546096 | 2.371267568 | 3553     | P01584    | 306.606799  | 701.24757 | 1312.4485 | 373.1659402   | 171.2564602   | 360.7774115   |
| IL-2                                                                                    | 11.19604793 | 10.61202718 | 0.037220251 | 0.2546096 | 1.499021159 | 3558     | P06568    | 1664.96043  | 2018.7895 | 3318.346  | 1515.33103    | 1527.116465   | 1653.493288   |
| IL-5                                                                                    | 11.21230848 | 10.51100794 | 0.036271824 | 0.2546096 | 1.625970486 | 3567     | P05113    | 1552.09003  | 1922.8334 | 3308.3166 | 1471.68448    | 1332.28825    | 1581.52939    |
| IL-10                                                                                   | 11.19145214 | 10.68187995 | 0.037887243 | 0.2546096 | 1.423627983 | 3586     | P22301    | 1647.85885  | 2313.6948 | 2950.8553 | 1694.61948    | 1570.531888   | 1662.593548   |
| IL-17                                                                                   | 10.09190846 | 9.641736986 | 0.031976345 | 0.2546096 | 1.366202629 | 3605     | Q16552    | 1189.53666  | 1085.0722 | 1187.4656 | 765.7437435   | 789.535328    | 839.9779429   |
| MIG                                                                                     | 8.934310314 | 7.917514996 | 0.033226142 | 0.2546096 | 2.023419309 | 4283     | Q07325    | 606.73943   | 633.18267 | 653.71687 | 261.517846    | 229.5244742   | 232.5359502   |
| PDGF-BB                                                                                 | 16.72714625 | 14.62757748 | 0.038191442 | 0.2546096 | 4.111226273 | 5155     | P01127    | 4036.3132   | 7991.517  | 221408.92 | 32465.55737   | 8469.495192   | 6681.171386   |
| EGF                                                                                     | 15.03953989 | 12.62882274 | 0.032513    | 0.2546096 | 5.317385811 | 1950     | P01133    | 8123.10991  | 25257.825 | 102416.62 | 13136.46479   | 2025.6609     | 9541.687773   |
| NT-3                                                                                    | 10.35426803 | 11.71626436 | 0.024126761 | 0.2546096 | 0.389043576 | 4908     | P01783    | 771.722743  | 2712.0788 | 875.91855 | 3719.466717   | 2225.228653   | 4400.403733   |
| Axl                                                                                     | 13.94076135 | 13.33804539 | 0.029338172 | 0.2546096 | 1.518572683 | 558      | P03530    | 21965.9345  | 14264.602 | 12471.399 | 8388.067715   | 10899.14912   | 1241.52758    |
| Angiostatin                                                                             | 12.19751265 | 11.4028765  | 0.02407511  | 0.2546096 | 1.641625442 | 5340     | P00747    | 3927.62421  | 5739.7543 | 3335.7259 | 2542.781738   | 3423.031289   | 2688.130661   |
| DAN                                                                                     | 10.22779978 | 9.260834904 | 0.024364601 | 0.2546096 | 1.954723945 | 4681     | P41271    | 1651.4977   | 615.15148 | 1545.408  | 733.877821    | 472.3703306   | 662.668327    |
| IL-17B                                                                                  | 11.81454651 | 10.96003455 | 0.036930921 | 0.2546096 | 1.80814698  | 27190    | Q9UHF5    | 2951.62614  | 2357.514  | 5535.5077 | 2330.903951   | 1297.801603   | 2609.020913   |
| SDF-1b                                                                                  | 8.22055058  | 9.298134037 | 0.022140577 | 0.2546096 | 1.4783218   | 6387     | P48061    | 266.916257  | 441.26737 | 457.57678 | 658.0181455   | 728.336935    | 516.0706686   |
| TREM-1                                                                                  | 9.891192402 | 9.156206541 | 0.036125924 | 0.2546096 | 1.664381158 | 54210    | Q9P919    | 1653.86089  | 678.53661 | 756.07856 | 614.6967784   | 563.2251789   | 533.671112    |
| NSE                                                                                     | 17.02907942 | 16.41488631 | 0.024340588 | 0.2546096 | 1.530701624 | 2026     | P01040    | 12261       |           |           |               |               |               |

|               |             |             |             |           |             |           |            |             |           |           |             |             |             |
|---------------|-------------|-------------|-------------|-----------|-------------|-----------|------------|-------------|-----------|-----------|-------------|-------------|-------------|
| Cadherin-11   | 10.06219782 | 10.68144148 | 0.066308335 | 0.2893392 | 0.651012134 | 1009      | P55287     | 1254.83506  | 1241.1923 | 1083.0807 | 1146.997885 | 2126.119889 | 1812.718122 |
| MICA          | 8.498539159 | 7.829901394 | 0.072912419 | 0.2944605 | 1.589571339 | 100507436 | Q22983     | 262.880959  | 264.54317 | 462.45509 | 259.4066811 | 173.9508606 | 257.551671  |
| VCAM-1        | 16.73192506 | 16.35039785 | 0.07345742  | 0.2944605 | 1.302720161 | 7412      | P19320     | 1214.18455  | 9874.422  | 12483.937 | 99109.73497 | 83940.35016 | 7109.694121 |
| IL-13         | 10.67956981 | 10.18477246 | 0.071485573 | 0.2944605 | 1.409112807 | 3596      | P35225     | 1169.992    | 1371.4053 | 2269.6217 | 1077.056977 | 1221.164009 | 1195.726263 |
| TNFA          | 11.53445067 | 10.98518098 | 0.073600974 | 0.2944605 | 1.463344748 | 4049      | P01374     | 1968.51337  | 2586.5941 | 4114.4045 | 2035.834217 | 1884.542055 | 2167.777716 |
| TARC          | 10.52980356 | 9.485515574 | 0.074284353 | 0.2944605 | 2.06234827  | 6361      | Q92583     | 726.438291  | 1544.6331 | 3860.1268 | 757.6055971 | 578.548483  | 836.853947  |
| Fcg RIIBC     | 10.47036691 | 9.024341886 | 0.072745671 | 0.2944605 | 2.724563324 | 2213      | P31994     | 1188.43655  | 2900.9019 | 572.82114 | 369.0198551 | 984.8016589 | 386.0599384 |
| Ck beta 8-1   | 9.74451478  | 10.52232401 | 0.072994337 | 0.2944605 | 0.583252895 | 6368      | P55773     | 1225.92354  | 1099.0653 | 728.62719 | 1389.035132 | 1745.382284 | 1309.510059 |
| Cadherin-13   | 4.316733197 | 9.005573    | 0.072519167 | 0.2944605 | 0.038772033 | 1012      | P55290     | 423.12972   | 370.84847 | 0         | 477.7645911 | 592.689073  | 476.7071313 |
| Galectin-9    | 14.36317622 | 13.57714198 | 0.068536602 | 0.2944605 | 1.724328013 | 3965      | P00182     | 26912.9875  | 15077.898 | 17355.208 | 21509.08507 | 9484.584876 | 8945.944345 |
| SP-D          | 5.510696927 | 11.5223414  | 0.073754547 | 0.2944605 | 0.01560836  | 66421     | P35247     | 1238.88256  | 3483.6546 | 0         | 1738.479889 | 3234.184694 | 4427.584059 |
| PECAM-1       | 13.81056993 | 12.75819527 | 0.076723153 | 0.3014124 | 2.073940732 | 5175      | P16284     | 7857.67401  | 18534.759 | 14314.044 | 8425.53366  | 3739.264006 | 10548.87175 |
| RANTES        | 17.68016548 | 16.86550414 | 0.079386808 | 0.3091168 | 1.75888522  | 6352      | P13501     | 168615.905  | 213639.08 | 232883.42 | 173957.1808 | 53753.8261  | 182055.2507 |
| IFNab R2      | 11.57178194 | 11.28927407 | 0.080815067 | 0.3092055 | 1.216307378 | 3455      | P48551     | 2718.29401  | 2834.1239 | 3364.7374 | 2498.696303 | 2405.728122 | 2604.650103 |
| HAI-2         | 11.50266829 | 10.20744983 | 0.080175875 | 0.3092055 | 2.780257321 | 6691      | P20155     | 8596.36894  | 965.11383 | 5326.3099 | 1875.818754 | 688.6650535 | 877.2719785 |
| CA125         | 16.59195605 | 14.20363028 | 0.082546745 | 0.3129513 | 5.235474762 | 94025     | QRWX17     | 70034.3265  | 9642.72   | 596038.35 | 34112.77511 | 15088.73571 | 13047.02769 |
| IGF-2R        | 11.24589477 | 10.9130818  | 0.083762588 | 0.3129513 | 1.574115701 | 3482      | P11177     | 4069.25594  | 1928.7061 | 1799.6607 | 1952.975928 | 1498.623564 | 1252.149554 |
| CD99          | 13.49096457 | 13.91966458 | 0.083927856 | 0.3129513 | 0.742946329 | 4267      | P14209     | 9829.03858  | 11185.647 | 13785.645 | 1958.92109  | 20464.14995 | 11392.68031 |
| IL-2          | 10.12627102 | 11.48288534 | 0.084640949 | 0.3129518 | 0.390497625 | 7097      | Q60603     | 1165.5548   | 740.6127  | 1646.9852 | 3619.927063 | 7521.790303 | 859.7559657 |
| TLR4          | 7.380805026 | 5.425180029 | 0.086836739 | 0.3168525 | 3.878839274 | 146433    | QGZJM4     | 91.7666901  | 178.75333 | 148.79773 | 91.1043388  | 8.069688002 | 93.96275928 |
| IAM-B         | 4.209762591 | 8.556418076 | 0.087134433 | 0.3168525 | 0.049150316 | 58494     | P57087     | 413.128586  | 282.08969 | 0         | 548.027867  | 471.161879  | 204.8402495 |
| ANGPTL3       | 10.95071034 | 10.58457849 | 0.090658466 | 0.326965  | 1.28892421  | 27329     | Q9Y5C1     | 1813.82399  | 1747.5841 | 2024.9764 | 1863.451699 | 1593.051349 | 1217.353762 |
| IL-1 RII      | 15.53440767 | 15.20469833 | 0.093227743 | 0.3302535 | 1.256759976 | 7850      | P27930     | 48146.3134  | 46363.956 | 40450.11  | 42158.79147 | 31382.72552 | 40070.27789 |
| IAM-A         | 4.311653114 | 8.668827994 | 0.093804445 | 0.3302535 | 0.048793241 | 50848     | Q9Y624     | 425.834429  | 363.32438 | 0         | 461.500075  | 427.3600158 | 339.2236977 |
| JLR4          | 7.092606209 | 11.40118819 | 0.093822201 | 0.3302535 | 0.052644186 | 7099      | Q00206     | 652.275189  | 617.74071 | 857.50734 | 4685.888965 | 2906.386044 | 1227.661041 |
| IL-12p70      | 9.965662188 | 9.336633158 | 0.095345124 | 0.3303296 | 1.546523794 | 3592      | P29459 & P | 750.270501  | 662.48128 | 1771.8762 | 625.6407314 | 752.3736499 | 571.5202739 |
| Ferritin      | 17.59746612 | 17.21127915 | 0.094647152 | 0.3303296 | 1.303934614 | 2512      | Q02292     | 70034.3265  | 16136.917 | 31296.347 | 187448.4348 | 135610.7521 | 137451.4244 |
| ANG-2         | 13.83984833 | 12.71144769 | 0.09619296  | 0.3306633 | 2.186217099 | 285       | O15123     | 33581.9718  | 7397.4531 | 13027.369 | 10268.66328 | 3956.677402 | 7422.086743 |
| CTACK         | 13.48031202 | 12.91159786 | 0.09640571  | 0.3406296 | 1.483201041 | 10850     | Q9Y4X3     | 9811.41535  | 9850.9765 | 12105.633 | 12360.39652 | 5424.29355  | 689.935792  |
| TFPI          | 12.69220231 | 11.43584023 | 0.100373684 | 0.3406296 | 2.388925861 | 7035      | P10646     | 3654.5854   | 6759.0543 | 10640.439 | 6019.310084 | 2448.500444 | 1440.771452 |
| IGF-1         | 11.14632902 | 10.75798782 | 0.102619594 | 0.3420653 | 1.292659324 | 3479      | P05019     | 1970.0412   | 2654.0822 | 2675.8889 | 1853.953982 | 1654.263943 | 1754.812648 |
| Zf4           | 10.33561017 | 11.53377399 | 0.10191665  | 0.3420653 | 0.435829628 | 51744     | Q9BZW8     | 1777.15417  | 872.86073 | 1734.4032 | 872.36479   | 8694.852547 | 1259.216526 |
| CD58          | 5.161753203 | 10.15681519 | 0.105523556 | 0.3491958 | 0.031357145 | 965       | P19256     | 2236.35411  | 732.89757 | 0         | 1146.83613  | 1193.95654  | 1083.641204 |
| BCMA          | 14.19569877 | 14.45067799 | 0.11093522  | 0.3569925 | 0.837993494 | 608       | Q02223     | 91401.9203  | 17399.397 | 19696.199 | 20587.179   | 24706.68466 | 26029.5224  |
| MMP-2         | 11.30447451 | 10.3891712  | 0.110378467 | 0.3569925 | 1.885965533 | 4313      | P08253     | 3248.39771  | 1020.5347 | 4613.5943 | 1667.878132 | 962.8460913 | 1498.42301  |
| Galectin-1    | 12.87067656 | 13.48811532 | 0.111154494 | 0.3569925 | 0.654267378 | 3956      | P90382     | 5118.88999  | 6110.5818 | 10912.614 | 14577.54002 | 14280.26962 | 7285.199089 |
| Desmoglein 2  | 15.31051775 | 15.05392407 | 0.110620574 | 0.3569925 | 1.194654719 | 1829      | Q14126     | 45788.0829  | 40385.245 | 40617.119 | 34005.87833 | 35902.27057 | 32325.4567  |
| PF4           | 15.03623658 | 15.76451798 | 0.113120261 | 0.3571391 | 0.603622546 | 5196      | P02776     | 65009.191   | 86002.187 | 18975.575 | 46979.83496 | 59420.60536 | 61788.28159 |
| Adipsin       | 15.88179924 | 15.64472768 | 0.113175673 | 0.3571391 | 1.178581532 | 1675      | P00746     | 62234.7097  | 59599.12  | 64845.182 | 53524.90442 | 51116.54645 | 49142.1399  |
| LAG-3         | 8.84832782  | 9.176688538 | 0.113635169 | 0.3571391 | 0.796435417 | 3902      | P18627     | 559.787903  | 490.70051 | 467.64863 | 594.4325711 | 624.1148565 | 159.7058489 |
| TRAIL R2      | 13.85642162 | 13.07877228 | 0.115317116 | 0.3598548 | 1.714329398 | 8795      | O14763     | 26753.753   | 10892.483 | 19661.384 | 7227.526032 | 11942.1753  | 7500.415943 |
| bFGF          | 11.15269668 | 9.998182856 | 0.118081391 | 0.365886  | 2.226093241 | 2247      | P09038     | 5907.90722  | 3807.8409 | 650.72391 | 968.7169335 | 885.1627462 | 1243.802229 |
| G-CSF         | 9.55435776  | 8.91729809  | 0.127292371 | 0.3902134 | 1.555350435 | 1440      | P09919     | 476.401002  | 1522.2484 | 612.82742 | 372.8042285 | 529.2833173 | 569.1254686 |
| EG-VEGF       | 10.30532315 | 11.45510321 | 0.127762021 | 0.3902134 | 0.450693932 | 84432     | P58294     | 669.517082  | 2212.8068 | 1128.6179 | 3873.233163 | 2789.345892 | 2046.129029 |
| IGF-2         | 12.42637898 | 11.65118861 | 0.128841329 | 0.3909668 | 1.754657897 | 3481      | P01344     | 1154.3336   | 3491.0808 | 5038.4133 | 4501.073429 | 3091.734571 | 216.20224   |
| IL-4          | 10.46421048 | 10.13349075 | 0.130327619 | 0.3927682 | 1.257640626 | 3565      | P05112     | 1270.89129  | 1180.2607 | 1980.5667 | 1162.420947 | 1153.214663 | 1054.323753 |
| FGF-4         | 10.20029317 | 9.449842493 | 0.133132532 | 0.3957994 | 1.68318285  | 2249      | P08620     | 823.385605  | 1490.2931 | 2048.8348 | 758.5577819 | 736.732909  | 609.367889  |
| Thyroglobulin | 12.25733782 | 11.18896211 | 0.13304723  | 0.3957994 | 2.097071002 | 7038      | P01266     | 3139.50351  | 2820.2209 | 16308.215 | 1189.279199 | 3192.647846 | 3346.370427 |
| MMP-1         | 10.2040287  | 8.112718586 | 0.134471744 | 0.3962343 | 4.261348717 | 4312      | P03956     | 1992.34501  | 152.99614 | 2112.3105 | 183.2671782 | 1346.564512 | 84.41170105 |
| Cadherin-4    | 7.61007822  | 11.67746954 | 0.135079876 | 0.3962343 | 0.059647632 | 1002      | P55283     | 2944.04438  | 526.17633 | 937.42486 | 4556.800768 | 7103.820457 | 1840.168973 |
| MMP-1F        | 14.96836611 | 13.43706489 | 0.138467552 | 0.3967295 | 1.54896143  | 6368      | P55773     | 4964.25765  | 26226.077 | 18875.896 | 23106.97071 | 14261.34502 | 26896.1952  |
| EDA-A2        | 6.54475756  | 4.273964118 | 0.138855316 | 0.3967295 | 4.825884682 | 1896      | Q9Z838     | 1110.894666 | 83.333401 | 82.374731 | 81.96852767 | 0           | 86.26916423 |
| IL-1 EA       | 5.13724972  | 7.831665979 | 0.138378594 | 0.3967295 | 0.154489928 | 26525     | Q9YB0H     | 0           | 85.496253 | 174.3205  | 301.2279949 | 290.5087681 | 133.1874816 |
| BMPR-1A       | 11.69638546 | 12.0211902  | 0.137036107 | 0.3967295 | 0.798403122 | 657       | P36894     | 4257.37777  | 2888.0309 | 3323.9242 | 3630.43553  | 3812.984856 | 5184.311644 |
| IL-1 RI       | 10.98238993 | 10.73335783 | 0.141872383 | 0.4003687 | 1.18840955  | 3554      | P14778     | 2025.14892  | 2157.9379 | 1727.5244 | 1771.931773 | 1697.60638  | 1637.336882 |
| Resistin      | 11.85547436 | 10.52956354 | 0.14285883  | 0.4003687 | 2.506911072 | 56729     | Q9HD89     | 5389.81783  | 15581.085 | 2340.4051 | 1761.081055 | 1200.581924 | 1564.305871 |
| FGF-6         | 6.578960276 | 5.324727718 | 0.142811389 | 0.4003687 | 2.385402233 | 2251      | P10767     | 101.183185  | 84.86012  | 97.369357 | 80.61709203 | 7.120312943 | 89.17002794 |
| SIGIRR        | 2.496790782 | 5.115902196 | 0.146757731 | 0.406122  | 0.162767953 | 59307     | Q6A17      | 11.2003272  | 82.188362 | 0         | 81.71475513 | 4.98421906  | 83.24217601 |
| CD135         | 10.7396396  | 9.450232416 | 0.146755804 | 0.406122  | 2.444275978 | 5817      | P15151     | 1033.07307  | 1619.3376 | 619.29658 | 940.3201541 | 519.6447442 | 697.4642744 |
| Cystatin B    | 11.45499047 | 14.50747107 | 0.150607853 | 0.4141716 | 1.179781262 | 1476      | P04080     | 29721.1045  | 23059.429 | 30779.04  | 23691.01497 | 24080.83505 | 22143.19798 |
| IL-15         | 11.24605759 | 10.97642064 | 0.157019784 | 0.4238571 | 1.205504428 | 3600      | P40933     | 2112.89952  | 2175.0061 | 3024.1477 | 2028.720552 | 2257.361478 | 1778.291732 |
| Adiponectin   | 19.11775283 | 18.87633883 | 0.157014163 | 0.4238571 | 1.182068795 | 9370      | Q15848     | 636031.747  | 537477.73 | 541637.99 | 482846.4983 | 508586.6    |             |

|              |              |              |             |           |             |        |        |             |           |           |             |             |             |
|--------------|--------------|--------------|-------------|-----------|-------------|--------|--------|-------------|-----------|-----------|-------------|-------------|-------------|
| ErbB2        | 7.95321307   | 7.515867441  | 0.255915091 | 0.5423368 | 1.354110647 | 2064   | P04626 | 206.759369  | 191.90568 | 314.78433 | 122.096558  | 184.2250548 | 267.880327  |
| GRoA         | 8.168280089  | 7.6503415    | 0.256724624 | 0.5423368 | 1.431907789 | 2919   | P09341 | 278.790903  | 151.19478 | 472.24134 | 172.3176732 | 191.7649615 | 241.703045  |
| IL-3         | 10.57155764  | 10.16320457  | 0.257329785 | 0.5423368 | 1.3271699   | 3562   | P08700 | 1385.88809  | 907.52893 | 2701.0233 | 1266.721204 | 1064.509979 | 1115.11086  |
| Galactin-3   | 12.68838527  | 10.5060994   | 0.254099177 | 0.5423368 | 4.40029028  | 3958   | P17931 | 1841.16915  | 1242.303  | 23289.561 | 1232.315596 | 208.5496759 | 13054.34549 |
| CA19-9       | 13.93171815  | 12.02616817  | 0.25391471  | 0.5423368 | 3.746516958 | 30815  | Q069X2 | 30381.6445  | 2276.0373 | 154706.97 | 29870.38788 | 1366.442122 | 1775.428371 |
| SLAM         | 2.310253645  | 5.716132303  | 0.257609957 | 0.5423368 | 0.094347058 | 6504   | Q13291 | 604.093627  | 0         | 0         | 431.2576459 | 335.0772873 | 0           |
| MIP-3a       | 10.0085189   | 8.843385317  | 0.272550169 | 0.5571127 | 2.242539786 | 6364   | P78556 | 322.387269  | 9039.1268 | 720.07314 | 392.6763661 | 547.1405456 | 448.0983508 |
| OSM          | 5.953094303  | 8.125381991  | 0.268563283 | 0.5571127 | 0.218585889 | 5008   | P13725 | 368.425372  | 180.7372  | 218.41648 | 274.5337436 | 327.1062876 | 239.8583855 |
| Cathepsin L  | 11.56890527  | 12.20550372  | 0.273491677 | 0.5571127 | 0.643227746 | 1514   | P07711 | 5943.8202   | 2585.3122 | 2728.6916 | 5935.065347 | 8126.67307  | 2182.751908 |
| CD163        | 14.91966722  | 14.43432456  | 0.270950016 | 0.5571127 | 1.399918329 | 9332   | Q86Vb7 | 42863.2921  | 43259.042 | 21079.948 | 32477.30427 | 22933.5962  | 14567.32207 |
| CHI3L1       | 13.68759394  | 13.45615582  | 0.269713993 | 0.5571127 | 1.174004647 | 1116   | P36222 | 12734.6965  | 13052.174 | 12443.37  | 11918.17317 | 11129.76116 | 10698.13311 |
| CD84         | 11.56123454  | 11.90599762  | 0.271799823 | 0.5571127 | 0.787437277 | 8832   | Q9UIb8 | 3834.27107  | 3840.8577 | 2442.3669 | 4851.051467 | 3454.23351  | 3370.199351 |
| CF XIV       | 6.11544192   | 9.96218472   | 0.269971609 | 0.5571127 | 0.069504837 | 5624   | P04070 | 6407.0155   | 3604.8052 | 0         | 748.3847343 | 2195.289132 | 602.0522115 |
| ENA-78       | 12.22248826  | 10.94114598  | 0.27897952  | 0.5588232 | 2.430650193 | 6374   | P42830 | 949.860166  | 3152.6355 | 16819.056 | 3650.78848  | 438.1645204 | 4738.216183 |
| TWEAK        | 8.113986714  | 8.466876695  | 0.277629429 | 0.5588232 | 0.783014006 | 8742   | Q43508 | 252.899325  | 481.04365 | 209.22288 | 377.1059818 | 310.80166   | 374.7159166 |
| CD229        | 8.14654874   | 11.08997798  | 0.276622145 | 0.5588232 | 0.129890828 | 4063   | Q9HBG7 | 4966.22327  | 1158.7102 | 1118.3314 | 2711.480599 | 2059.724504 | 1851.940574 |
| Siglec-10    | 2.321038581  | 6.218922668  | 0.279411622 | 0.5588232 | 0.067084144 | 89790  | Q96Lc7 | 622.460489  | 0         | 0         | 1150.355574 | 357.9530059 | 0           |
| IL-12p40     | 8.593942595  | 9.023197969  | 0.282361707 | 0.5621789 | 0.742538384 | 3593   | P29460 | 337.389633  | 301.5582  | 689.59158 | 776.7156662 | 346.6017997 | 520.1517012 |
| IL-13 R1     | 11.62973628  | 11.43268912  | 0.284786805 | 0.5642517 | 1.146349654 | 3597   | P78552 | 2910.33247  | 3128.5784 | 3224.449  | 3265.560871 | 2208.097295 | 2926.126375 |
| GASP-1       | 16.29222027  | 15.97944889  | 0.287255432 | 0.5642517 | 1.242091441 | 124857 | Q8TEU8 | 109458.294  | 69781.756 | 10181.63  | 57862.78003 | 78538.53578 | 59344.13948 |
| Syndecan-4   | 14.59996253  | 14.01226476  | 0.286477505 | 0.5642517 | 1.502846615 | 6385   | P31431 | 12329.6994  | 19690.039 | 46955.529 | 17617.33362 | 10962.92819 | 23355.35088 |
| Prolectin    | 13.33731596  | 12.49304463  | 0.289051877 | 0.565257  | 1.795357729 | 5617   | P01236 | 9543.25022  | 14738.428 | 9046.7744 | 19315.11271 | 5032.259427 | 1969.491041 |
| Endoglin     | 15.88464957  | 15.609871    | 0.290463773 | 0.5655047 | 1.209808386 | 2022   | P17813 | 74830.1803  | 49760.533 | 81992.985 | 50294.56874 | 47221.54318 | 52653.93774 |
| IL-17R       | 11.33766983  | 11.6847901   | 0.293364837 | 0.5661427 | 0.786195893 | 23765  | Q96F46 | 2407.45562  | 2173.051  | 4280.9876 | 2577.8902   | 3009.372537 | 4594.05477  |
| Osteoactivin | 14.7068535   | 15.03718804  | 0.292674905 | 0.5661427 | 0.797560279 | 10457  | Q14956 | 30810.687   | 26867.262 | 26500.766 | 42413.37131 | 45170.95884 | 1975.15515  |
| Siglec-5     | 17.60743492  | 15.25023149  | 0.295740121 | 0.5682343 | 5.123761893 | 8778   | Q15389 | 154598.804  | 227746.42 | 223630.02 | 1175.163024 | 224305.0203 | 224399.0265 |
| E-Selectin   | 13.12264928  | 12.76683318  | 0.324182069 | 0.5858922 | 1.27969154  | 6401   | P16581 | 13082.8377  | 5967.3346 | 8204.1021 | 4467.242991 | 9739.492828 | 1777.56636  |
| IGFBP-4      | 11.62615684  | 10.98901166  | 0.321029675 | 0.5858922 | 1.555248576 | 3287   | P2692  | 3967.18973  | 2837.3076 | 2528.9768 | 4196.527991 | 1155.457198 | 1728.59026  |
| PIGF         | 10.50716307  | 9.946924321  | 0.321728384 | 0.5858922 | 1.474513216 | 5428   | P49763 | 980.614313  | 1847.1456 | 2437.8675 | 543.2614067 | 2130.374028 | 878.986986  |
| CA15-3       | 13.05202276  | 12.7606069   | 0.325003228 | 0.5858922 | 1.223840765 | 4582   | P15941 | 6439.55615  | 8512.6622 | 11447.41  | 9490.988754 | 6589.878495 | 5340.654327 |
| MMP-10       | 9.99018966   | 10.6246134   | 0.30819864  | 0.5858922 | 0.644198077 | 4319   | Q9P238 | 2040.09093  | 1346.7023 | 1247.983  | 1258.157317 | 1810.708605 | 1724.097462 |
| BMP-2        | 6.553575037  | 8.695473343  | 0.317360859 | 0.5858922 | 0.226581455 | 650    | P12643 | 339.771594  | 393.77354 | 0         | 328.8436882 | 538.8168452 | 399.1661028 |
| Chemerin     | 13.04261497  | 14.27187748  | 0.315312715 | 0.5858922 | 0.42653543  | 5919   | Q99969 | 17127.7866  | 23117.145 | 631.14843 | 2018.85253  | 16661.6624  | 22100.1864  |
| MBL          | 17.49843925  | 17.66357871  | 0.3208326   | 0.5858922 | 0.891842305 | 4153   | P11226 | 192956.07   | 20026.13  | 193616.75 | 232709.4999 | 201004.9089 | 191326.002  |
| ANG-4        | 8.518298528  | 7.838961054  | 0.325512963 | 0.5858922 | 1.601431871 | 51378  | Q9Y264 | 237.36682   | 286.26368 | 1467.7715 | 189.8798736 | 222.682178  | 280.1042979 |
| Cystatin C   | 16.848979329 | 16.670893137 | 0.316337767 | 0.5858922 | 1.131376978 | 1471   | P10304 | 121208.082  | 100936.42 | 126239.68 | 111513.1315 | 114953.0129 | 88604.97612 |
| VE-Cadherin  | 7.783122198  | 8.297420239  | 0.325818271 | 0.5858922 | 0.700133508 | 1003   | P3151  | 331.842479  | 254.99227 | 265.3326  | 203.0625202 | 355.285312  | 427.3077766 |
| WISP-1       | 5.948327152  | 7.854354791  | 0.326072286 | 0.5858922 | 0.266826223 | 55515  | Q96FT7 | 214.5984488 | 183.19833 | 365.07348 | 242.0060172 | 270.9034372 | 186.5674356 |
| Marapsin     | 9.040173176  | 8.63541257   | 0.32623545  | 0.5858922 | 1.323869216 | 83886  | Q9BQR3 | 349.120709  | 481.55256 | 794.77897 | 696.6055989 | 291.9328307 | 306.7348061 |
| CNTF         | 11.56854589  | 11.82706605  | 0.322186281 | 0.5858922 | 0.83943441  | 1270   | P26441 | 4292.67235  | 2563.1871 | 2895.8064 | 2997.443463 | 4724.337611 | 3384.155067 |
| S100A8       | 11.24343929  | 10.65167451  | 0.317019791 | 0.5858922 | 1.507089179 | 6279   | P05109 | 1377.61516  | 2659.0694 | 6150.0104 | 1243.443261 | 1910.466558 | 1749.164163 |
| Cystatin A   | 7.907538028  | 10.53703551  | 0.317936174 | 0.5858922 | 0.161600382 | 14750  | Q04304 | 3768.79195  | 925.20826 | 950.91576 | 963.8250156 | 1620.406726 | 2095.769741 |
| IL-10 Rb     | 9.904093099  | 9.487837804  | 0.333400823 | 0.5869037 | 1.334459291 | 3588   | Q08334 | 599.745069  | 991.84954 | 1036.4894 | 540.7378596 | 989.0057716 | 689.1514497 |
| NRG1-b1      | 8.596582996  | 8.204707988  | 0.335428626 | 0.5869037 | 1.312097572 | 3084   | Q02297 | 502.335887  | 485.62033 | 294.4558  | 522.3828311 | 238.8426855 | 203.5708127 |
| Lymphotactin | 6.602794329  | 7.42996658   | 0.333432481 | 0.5869037 | 1.226363294 | 6375   | P47992 | 176.93129   | 229.70539 | 114.71988 | 262.509593  | 102.3137354 | 187.3535573 |
| MSP          | 11.59670518  | 11.38107969  | 0.333980966 | 0.5869037 | 1.16120726  | 4485   | P26927 | 3287.54274  | 2961.3004 | 3080.3659 | 2674.470172 | 2477.30161  | 2860.444178 |
| Siglec-9     | 7.936160174  | 10.4095187   | 0.336135749 | 0.5869037 | 0.180071499 | 27180  | Q9Y336 | 2276.65892  | 1235.4979 | 1299.4743 | 1372.791059 | 1364.22046  | 1304.554679 |
| BAFF         | 8.205016777  | 7.425238476  | 0.331251789 | 0.5869037 | 1.716867023 | 10673  | Q9Y275 | 243.516898  | 114.40123 | 1332.9343 | 132.5530209 | 124.1100675 | 302.8872954 |
| ULBP-1       | 5.962094845  | 8.132287286  | 0.332601168 | 0.5869037 | 0.222181031 | 80329  | Q9BZM6 | 122.392511  | 85.443079 | 0         | 109.3541684 | 1086.856585 | 183.0038171 |
| MCP-4        | 8.290305069  | 8.557039643  | 0.341281505 | 0.5911963 | 0.831198771 | 6357   | Q99616 | 281.324705  | 448.17098 | 298.4388  | 482.582524  | 265.4208648 | 413.7037747 |
| Activin A    | 10.17426684  | 9.91600508   | 0.340481458 | 0.5911963 | 1.196036782 | 3624   | P08476 | 1591.54726  | 985.50522 | 1213.1515 | 776.8839054 | 1307.660852 | 884.733601  |
| Midkine      | 12.68325315  | 13.00894816  | 0.344387864 | 0.5942379 | 0.797913903 | 4282   | P14174 | 6600.49655  | 5651.4858 | 8785.146  | 11135.89949 | 10309.4105  | 4876.649302 |
| MCP-1        | 12.68145758  | 12.92869551  | 0.361736946 | 0.6156306 | 0.842507947 | 6347   | P13500 | 7868.80086  | 4570.9763 | 8903.0992 | 8331.306398 | 6261.442089 | 9060.778887 |
| MIP-1a       | 11.60614308  | 11.95498726  | 0.359797549 | 0.6156306 | 0.785212822 | 6348   | P10147 | 4185.7325   | 2541.0469 | 3127.1429 | 3909.621576 | 6500.888371 | 2462.183438 |
| FGF-7        | 10.2262405   | 9.893684856  | 0.362382554 | 0.6156306 | 1.25927393  | 2252   | P21781 | 977.954166  | 1406.063  | 1841.4918 | 870.7594178 | 944.0962215 | 1043.677138 |
| PAI-1        | 14.4828822   | 14.0150414   | 0.361732816 | 0.6156306 | 1.37686545  | 5054   | P05121 | 9673.4133   | 23779.138 | 37559.711 | 15209.39421 | 13273.04469 | 22778.08362 |
| SDF-1a       | 9.239153492  | 9.424994306  | 0.365617593 | 0.6187375 | 0.888083585 | 6387   | P48061 | 563.341475  | 581.75668 | 745.02262 | 762.6381657 | 607.9339396 | 681.8361392 |
| ErbB3        | 2.652917417  | 6.082179424  | 0.367298348 | 0.6192003 | 0.092830197 | 2066   | Q15303 | 1563.69925  | 0         | 0         | 246.612504  | 1254.980119 | 0           |
| MMP-13       | 13.363912428 | 12.99446058  | 0.383057334 | 0.6433024 | 1.291861061 | 4322   | P44552 | 11493.0148  | 7961.0835 | 7150.9349 | 11525.52358 | 9118.134892 | 5169.294157 |
| TIMP-1       | 16.40675378  | 16.53950408  | 0.38469967  | 0.643604  | 0.912375554 | 7076   | P01033 | 91132.3357  | 96316.948 | 81237.565 | 86326.00216 | 98648.98163 | 101392.582  |
| IGFBP-6      | 15.22924437  | 15.08652983  | 0.392715624 | 0.654526  | 1.103980385 | 3489   | P24592 | 4040.358    | 4670.749  | 33672.747 | 33075.31429 | 34480.72556 | 36929.73277 |
| IL-1 F6      | 5.716642687  | 4.317943133  | 0.399208195 | 0.6620812 | 0.636638083 | 27179  | Q9UHA7 | 92.9121827  | 81.933309 | 9.1881962 | 89.3913421  | 0           | 86.77366227 |
| ULBP-2       | 12.0409      |              |             |           |             |        |        |             |           |           |             |             |             |

|              |             |             |             |           |             |        |         |             |           |           |             |              |             |
|--------------|-------------|-------------|-------------|-----------|-------------|--------|---------|-------------|-----------|-----------|-------------|--------------|-------------|
| Troponin I   | 9.588238001 | 9.76275875  | 0.530411135 | 0.7577302 | 0.883302348 | 7135   | P19237  | 986.760304  | 1023.4871 | 752.45901 | 846.5977615 | 832.1531421  | 936.1280546 |
| Persephin    | 11.94154325 | 12.00939269 | 0.532565664 | 0.7583459 | 0.896360239 | 5623   | O60542  | 5645.00557  | 3971.1367 | 3720.4897 | 4521.723835 | 4882.823314  | 3824.43103  |
| Insulin      | 11.21318337 | 11.66394084 | 0.538501074 | 0.7618665 | 0.731658859 | 3630   | P01308  | 852.087194  | 3489.6957 | 3259.8346 | 8725.92472  | 1860.982458  | 2101.574377 |
| IGF-1R       | 9.208191134 | 8.779399327 | 0.537396062 | 0.7618665 | 1.3461058   | 3488   | P08069  | 362.143014  | 346.70319 | 1574.8295 | 293.1296122 | 1096.679436  | 261.7685265 |
| GH           | 12.93475407 | 12.45017752 | 0.544114062 | 0.7664287 | 1.399175134 | 2688   | P01241  | 15271.6259  | 10204.952 | 9169.7723 | 4055.954869 | 2453.025314  | 17600.57125 |
| TECK         | 8.183828321 | 8.412721958 | 0.545209488 | 0.7664287 | 0.853289004 | 6370   | O15444  | 340.611666  | 231.90168 | 444.91257 | 507.8813823 | 208.4349436  | 370.3472316 |
| IL-9         | 10.21204277 | 10.09350162 | 0.561411831 | 0.7866917 | 1.085976084 | 3578   | P15248  | 1166.93811  | 1354.1378 | 1124.8755 | 1445.027265 | 1054.009929  | 853.0823738 |
| L-Selectin   | 15.67120185 | 15.59896253 | 0.58715851  | 0.7948072 | 1.051347296 | 6402   | P14151  | 52086.5965  | 52816.207 | 52507.186 | 49762.20896 | 48861.39244  | 50277.66843 |
| TIM-1        | 12.34409935 | 11.74553706 | 0.574691986 | 0.7948072 | 1.514206835 | 26762  | Q96D42  | 34580.4314  | 1661.7008 | 3833.788  | 3946.139256 | 7679.092449  | 1334.451176 |
| SCF R        | 15.18176629 | 15.2683003  | 0.587208838 | 0.7948072 | 0.941782614 | 3815   | P10721  | 36635.2691  | 42477.147 | 35268.284 | 42189.79993 | 37588.46697  | 38757.34189 |
| VEGF         | 11.11698224 | 11.35635315 | 0.585252852 | 0.7948072 | 0.847114622 | 7422   | P15692  | 1821.22087  | 2903.4289 | 3551.1462 | 3489.575956 | 1577.276449  | 3270.362312 |
| IL-18 Rb     | 8.909548551 | 8.519261167 | 0.587974083 | 0.7948072 | 1.310654459 | 8807   | O95256  | 447.722685  | 256.51473 | 1057.4523 | 282.6082655 | 1108.114961  | 156.0232671 |
| APRIL        | 8.695303302 | 8.88139153  | 0.582080212 | 0.7948072 | 0.878985805 | 8741   | O75888  | 500.07782   | 450.39186 | 311.5951  | 295.0504116 | 451.6073186  | 781.7248228 |
| IL-1 R6      | 11.27335413 | 11.16651254 | 0.587633114 | 0.7948072 | 1.076868131 | 8808   | Q9HB29  | 2340.44666  | 2169.3191 | 3336.7    | 2264.854919 | 2484.279437  | 2155.544069 |
| SOST         | 8.475497292 | 7.934716162 | 0.571604246 | 0.7948072 | 1.454759967 | 50964  | Q9QB04  | 311.560308  | 255.31802 | 2289.0963 | 188.7308295 | 247.0535652  | 310.2288385 |
| IGFBP-5      | 5.78234025  | 5.199707773 | 0.588879889 | 0.7948072 | 1.497579173 | 3488   | P24593  | 11.9640345  | 86.514066 | 84.990815 | 91.61188386 | 5.458906589  | 81.98093092 |
| IL-1 F9      | 4.623233733 | 5.370125809 | 0.575237023 | 0.7948072 | 0.595885862 | 56300  | Q9NZH8  | 4.83652458  | 84.605667 | 7.6568302 | 78.54259849 | 9.96843812   | 10.08906328 |
| TIM-1 R5     | 7.15609905  | 6.97556138  | 0.583114848 | 0.7948072 | 1.133306172 | 8809   | Q13478  | 103.603448  | 107.37922 | 179.8079  | 185.8883793 | 102.7284157  | 102.7284157 |
| Nectin-4     | 11.92554023 | 12.04392888 | 0.576656643 | 0.7948072 | 0.921215986 | 81607  | Q96NY8  | 4697.80911  | 4190.1707 | 3220.1072 | 4462.353884 | 4061.960956  | 4150.906849 |
| IL-29        | 9.97395177  | 10.04868714 | 0.59430645  | 0.7964813 | 0.949516275 | 282618 | QRU154  | 1052.51658  | 1014.1661 | 991.8912  | 1129.335597 | 1102.371015  | 951.660411  |
| IG-H3        | 13.0886227  | 12.99585866 | 0.593289144 | 0.7964813 | 1.066391386 | 7045   | Q15582  | 8126.50679  | 8154.2051 | 9489.7477 | 9823.915352 | 6928.301837  | 8005.374842 |
| TRAIL        | 9.300125608 | 9.494334266 | 0.595550785 | 0.7964813 | 0.874052299 | 8743   | P50591  | 403.190353  | 512.65847 | 811.57403 | 629.477788  | 825.9954076  | 718.557165  |
| FLRG         | 13.46597557 | 13.00336032 | 0.598619394 | 0.7981592 | 1.378035798 | 10272  | O95633  | 55316.624   | 5025.0883 | 10079.915 | 5674.63408  | 19800.15507  | 4925.05875  |
| E-Cadherin   | 10.02132979 | 9.830323811 | 0.601409336 | 0.7994565 | 1.141559435 | 999    | P12830  | 1880.10538  | 804.21403 | 1172.4697 | 850.914888  | 1079.962128  | 818.3327532 |
| LepTin       | 11.99215575 | 11.29238682 | 0.609630311 | 0.8079438 | 1.624244618 | 3952   | P41159  | 383.782246  | 4309.4714 | 4639.2751 | 3290.734687 | 1707.537547  | 2004.382729 |
| ADAM9        | 12.15793511 | 11.89452871 | 0.613518813 | 0.8096095 | 1.200309462 | 8754   | Q13443  | 9833.00447  | 2865.0768 | 4901.7767 | 5694.302362 | 4696.138899  | 4061.906697 |
| Cystatin E M | 15.4368311  | 15.27421294 | 0.614567233 | 0.8096095 | 1.119311481 | 1474   | Q12828  | 74304.1452  | 37825.268 | 38405.639 | 3108.607706 | 4059.93259   | 20276.80477 |
| C5a          | 13.55518331 | 13.27715416 | 0.617405798 | 0.810921  | 1.212537316 | 727    | P01031  | 19002.5309  | 10414.324 | 12024.877 | 8212.406279 | 9931.596658  | 11990.64821 |
| TGFa         | 11.75709841 | 12.0924253  | 0.622200334 | 0.8147862 | 1.081998915 | 7039   | P01135  | 1625.91005  | 2228.4312 | 6565.0254 | 4265.530246 | 6590.684011  | 2763.396142 |
| Albumin      | 16.20640947 | 16.08383857 | 0.62563349  | 0.8168508 | 1.08867316  | 213    | P02768  | 88585.1926  | 59022.046 | 80958.752 | 56329.71243 | 70984.90616  | 83797.38391 |
| Cathepsin S  | 12.91367213 | 12.68796458 | 0.629559189 | 0.8195445 | 1.169350608 | 1520   | P25774  | 14646.0999  | 6419.0195 | 7086.2686 | 4569.11527  | 4987.531808  | 12602.00821 |
| CD97         | 12.29751236 | 11.96366811 | 0.665976117 | 0.8386435 | 0.945255278 | 976    | P48960  | 6284.8044   | 4506.0574 | 4840.4371 | 5620.879154 | 5582.539037  | 4810.958583 |
| DNAM-1       | 11.00414241 | 11.1271859  | 0.63846673  | 0.8263863 | 0.918248478 | 10666  | Q15762  | 2237.70159  | 1901.5614 | 2085.3725 | 1827.535182 | 2690.537744  | 2272.769191 |
| PCRP-S       | 17.99120209 | 17.86542546 | 0.645310359 | 0.8302239 | 0.952436378 | 8993   | O75594  | 226576.602  | 231777.32 | 2241.1516 | 21722.1959  | 242012.3341  | 207070.7432 |
| Dkk-3        | 17.14672889 | 17.06733791 | 0.644896829 | 0.8302239 | 1.05657193  | 27122  | Q9UBP4  | 160853.314  | 136456.05 | 150911.63 | 137819.7056 | 155558.4667  | 120816.8438 |
| Syndecan-3   | 9.953575809 | 10.19056199 | 0.650995568 | 0.8350964 | 0.848513559 | 96752  | O705056 | 648.819566  | 861.05595 | 667.68561 | 1747.225622 | 1206.578886  | 754.9366647 |
| AR           | 10.45276366 | 10.14398034 | 0.667102753 | 0.8386435 | 1.238662652 | 374    | P15514  | 1794.684015 | 1938.4484 | 2889.0502 | 1826.283027 | 955.05759    | 828.1578089 |
| IL-2 Rb      | 10.27874246 | 10.19611057 | 0.661353695 | 0.8386435 | 1.058948206 | 3560   | P14784  | 1290.80005  | 1244.6314 | 1294.0115 | 1089.52923  | 1537.668387  | 961.1062192 |
| AFP          | 14.67484024 | 14.43289188 | 0.658232863 | 0.8386435 | 1.18258867  | 174    | P02771  | 65161.0319  | 19087.049 | 22376.017 | 33395.7331  | 24728.75782  | 13099.15076 |
| Legumain     | 14.44609417 | 14.62744681 | 0.66019728  | 0.8386435 | 0.881875781 | 5641   | Q99538  | 28969.9544  | 26877.124 | 19543.196 | 38844.9406  | 25147.0866   | 16596.7824  |
| aFGF         | 12.032051   | 11.96366811 | 0.665976117 | 0.8386435 | 1.048540724 | 2246   | P05230  | 4434.99098  | 4081.9611 | 4095.1668 | 3525.233079 | 4676.130335  | 3862.477521 |
| IL-1 F10     | 7.540113428 | 7.413915893 | 0.664552625 | 0.8386435 | 1.091413304 | 84639  | QRWZ1   | 157.69157   | 187.15028 | 197.54622 | 239.3074972 | 104.8466801  | 193.979495  |
| DR3          | 3.779101249 | 3.52376742  | 0.666418497 | 0.8386435 | 0.393851727 | 8178   | Q93038  | 21.611552   | 163.74465 | 0         | 201.4253505 | 208.2210296  | 0           |
| BMP-7        | 10.95691182 | 10.80634131 | 0.67271463  | 0.8408933 | 1.110008332 | 655    | P18075  | 1456.64068  | 2077.5887 | 3094.013  | 1552.84262  | 2522.275372  | 1463.626726 |
| 6CKine       | 9.729246586 | 9.51296058  | 0.671283065 | 0.8408933 | 1.161710433 | 6366   | O00585  | 438.76965   | 1001.6344 | 1185.6377 | 979.0386155 | 517.041273   | 767.217042  |
| Fractalkine  | 11.35519371 | 11.4442797  | 0.678722468 | 0.845997  | 0.940118167 | 6376   | P78423  | 3541.22315  | 2518.2724 | 2493.3884 | 2607.104513 | 3100.609001  | 2673.880606 |
| IL-17C       | 4.835148012 | 5.367031764 | 0.687243389 | 0.8542008 | 0.691651043 | 27189  | Q9P0M4  | 6.61840206  | 77.608206 | 11.612859 | 85.52134311 | 9.019063061  | 80.0890328  |
| VEGF R1      | 9.005909442 | 9.216302281 | 0.689442788 | 0.8545206 | 0.864301854 | 2321   | P17948  | 518.40958   | 942.64133 | 673.58124 | 595.0224457 | 433.4325385  | 811.7656603 |
| MIP-1d       | 14.86091353 | 14.52990544 | 0.701995885 | 0.8549403 | 1.257892032 | 6359   | Q16663  | 6333.6033   | 55303.753 | 6261.1006 | 37627.34554 | 14183.73458  | 24800.24399 |
| b-NGF        | 10.3764451  | 10.24510609 | 0.697266848 | 0.8549403 | 0.95309821  | 4803   | P01138  | 1193.24387  | 1910.0288 | 1307.1339 | 988.6820529 | 1212.198399  | 1487.76176  |
| VEGF R2      | 14.46364785 | 14.5046545  | 0.709028044 | 0.8549403 | 0.941597499 | 3911   | P35968  | 20751.8094  | 24523.288 | 19980.702 | 28666.52555 | 17356.74672  | 27763.89922 |
| IL-13        | 12.74892936 | 12.68332398 | 0.711154896 | 0.8549403 | 1.045070508 | 3572   | P41909  | 5393.67357  | 7807.1782 | 7546.1754 | 6941.003672 | 6303.42901   | 6528.176875 |
| TSH          | 10.69288871 | 10.82666011 | 0.703085752 | 0.8549403 | 0.911445692 | 7252   | Q12282  | 1651.4224   | 1231.0545 | 3023.5897 | 1556.30292  | 1823.4000781 | 1207.409613 |
| FAP          | 17.50077219 | 17.44212392 | 0.695547757 | 0.8549403 | 1.041489481 | 2191   | Q12884  | 203678.762  | 175941.02 | 191702.74 | 196503.0363 | 170108.393   | 168929.3562 |
| WIF-1        | 13.28658118 | 13.34477199 | 0.706229682 | 0.8549403 | 0.960467825 | 11197  | Q9YSW5  | 10114.3286  | 9457.4567 | 10395.156 | 11152.86329 | 10743.08435  | 9394.831817 |
| Fetuin A     | 12.67237101 | 12.58648811 | 0.709667401 | 0.8549403 | 1.061337063 | 197    | Q02765  | 6035.92306  | 4713.6436 | 7231.6388 | 5596.706331 | 6385.155129  | 6134.828384 |
| RANK         | 9.408500915 | 9.188678888 | 0.70552865  | 0.8549403 | 1.164589012 | 8792   | Q9Y6Q6  | 827.643406  | 541.38625 | 1844.6643 | 591.0746715 | 659.2415702  | 544.1329252 |
| TRANCE       | 8.906315076 | 8.506351296 | 0.704521338 | 0.8549403 | 1.319474784 | 8600   | O14788  | 437.309765  | 514.15407 | 2726.5935 | 246.480911  | 655.8714796  | 294.7866741 |
| CD27         | 10.82591207 | 10.66517768 | 0.70931366  | 0.8549403 | 1.117856264 | 970    | P32970  | 1959.72546  | 1815.6066 | 1664.7611 | 1038.63622  | 2895.453398  | 1368.213521 |
| CXCL14       | 8.868104509 | 8.650712386 | 0.713496375 | 0.855418  | 1.162630067 | 9547   | O9Y715  | 342.310695  | 376.03863 | 1393.7799 | 253.7374434 | 364.247934   | 616.0245532 |
| CXCL16       | 14.48282936 | 14.54724227 | 0.716085511 | 0.8561892 | 0.956334409 | 58191  | Q9H2A7  | 21259.3354  | 21953.143 | 24139.402 | 29483.77919 | 21518.3631   | 2426.2541   |
| LIMP1        | 11.29816748 | 11.58815383 | 0.721308035 | 0.8600963 | 0.817907243 | 950    | Q13408  | 2575.9317   | 1350.694  | 3242.7331 | 2111.0      |              |             |

|                  |             |             |             |           |              |        |        |            |           |           |             |             |             |
|------------------|-------------|-------------|-------------|-----------|--------------|--------|--------|------------|-----------|-----------|-------------|-------------|-------------|
| NT-4             | 10.89894171 | 10.85102114 | 0.919864328 | 0.9664994 | 1.033773816  | 4909   | P34130 | 830.666008 | 3495.7397 | 2597.6063 | 2616.948457 | 1559.351388 | 1541.641592 |
| GCP-2            | 7.274522243 | 7.222095281 | 0.901797799 | 0.9664994 | 1.037007956  | 6372   | P80162 | 213.732955 | 244.95018 | 92.933843 | 162.8103949 | 124.2636008 | 161.1942986 |
| ICAM-2           | 14.23267487 | 14.21621709 | 0.9116365   | 0.9664994 | 1.011472983  | 3384   | P13598 | 21595.4655 | 19017.361 | 20338.929 | 19728.43708 | 18413.70685 | 18976.70969 |
| HGF R            | 17.05599993 | 17.04310516 | 0.921650383 | 0.9664994 | 1.008978036  | 4233   | P08581 | 137440.399 | 136190.75 | 133655.57 | 146419.5861 | 131136.4006 | 128270.125  |
| Pepsinogen 1     | 17.14068355 | 17.12712449 | 0.924764204 | 0.9664994 | 1.009442732  | 643834 | P0DJ8  | 150003.007 | 155175.37 | 139070.68 | 140986.2231 | 151363.6014 | 137444.5083 |
| TSP-1            | 14.96621839 | 14.98646601 | 0.924013883 | 0.9664994 | 0.986063441  | 7057   | P07996 | 37480.9275 | 36562.139 | 29837.852 | 31291.82552 | 35168.4509  | 31081.57786 |
| Gas 1            | 6.623023557 | 6.601275981 | 0.9221608   | 0.9664994 | 1.015188461  | 2619   | P54826 | 101.82157  | 90.839769 | 95.965605 | 100.4939225 | 96.9549279  | 91.06189557 |
| IL-20            | 5.448089996 | 5.564515006 | 0.914990648 | 0.9664994 | 0.922470698  | 50604  | Q9NYY1 | 5.09107851 | 77.989886 | 84.225132 | 89.32793108 | 12.104532   | 88.53940539 |
| Mer              | 7.146058222 | 7.184398835 | 0.920385141 | 0.9664994 | 0.973774338  | 10461  | Q12866 | 197.661123 | 181.17063 | 99.538792 | 184.3657441 | 89.71594308 | 181.9976666 |
| MEPE             | 11.20392577 | 11.15574472 | 0.904457988 | 0.9664994 | 1.033960489  | 56955  | Q9NQ76 | 3398.2926  | 1900.3047 | 2064.1256 | 1597.076307 | 1774.775923 | 4183.616617 |
| Kallikrein 5     | 11.12683037 | 11.2083687  | 0.906906691 | 0.9664994 | 0.945049411  | 25818  | Q9Y337 | 5058.43498 | 3125.5588 | 563.72692 | 3581.411864 | 1606.109402 | 2300.148193 |
| NGF R            | 11.5767694  | 11.52410934 | 0.928606665 | 0.9682155 | 1.037175516  | 4804   | P08138 | 3114.33249 | 3148.2747 | 4043.8504 | 1934.865255 | 1651.426883 | 7984.651943 |
| I-309            | 7.977056436 | 7.955502506 | 0.935609936 | 0.9732113 | 1.015052207  | 6346   | P22362 | 189.461014 | 223.83372 | 311.55704 | 263.0850021 | 209.2599346 | 274.4446821 |
| IL-21R           | 8.095983624 | 8.125975107 | 0.945726414 | 0.979105  | 0.97942608   | 50615  | Q9HBE5 | 183.708792 | 260.5463  | 368.65286 | 354.1816991 | 290.5975965 | 209.5000643 |
| CD40             | 8.816344633 | 8.847066042 | 0.945489925 | 0.979105  | 0.9788930668 | 958    | P25942 | 969.157256 | 337.56832 | 484.15226 | 346.4448195 | 487.5960058 | 574.2557974 |
| HCC-1            | 15.74656825 | 15.73801245 | 0.957114429 | 0.9843252 | 1.005948047  | 6358   | Q16627 | 50442.5923 | 58905.093 | 54283.511 | 65186.317   | 47522.8266  | 52693.70169 |
| EpCAM            | 10.81590316 | 10.79337598 | 0.959643483 | 0.9843252 | 1.015737193  | 4072   | P16422 | 2852.74523 | 2326.0643 | 2011.6753 | 1690.037788 | 1381.792418 | 2389.448943 |
| sFRP-3           | 9.535571793 | 9.512921558 | 0.959717095 | 0.9843252 | 1.015823838  | 2487   | Q92765 | 853.551837 | 588.878   | 894.50445 | 704.917093  | 1547.937728 | 355.6453371 |
| GITR L           | 11.06827411 | 11.04410122 | 0.955020845 | 0.9843252 | 1.016896529  | 8995   | Q9UNG2 | 1342.44573 | 1675.8672 | 4843.9013 | 1968.200086 | 2608.235555 | 1831.373883 |
| Dkk              | 13.10563783 | 13.08091398 | 0.965440016 | 0.9861528 | 1.017284956  | 7301   | Q06418 | 19567.3915 | 7429.6913 | 12179.413 | 10623.40442 | 9847.475995 | 6215.827379 |
| CTLA4            | 8.333691183 | 8.341489208 | 0.968222767 | 0.9861528 | 0.994609403  | 1493   | P16410 | 270.590823 | 345.67458 | 344.55736 | 348.1759132 | 256.8059535 | 378.1212783 |
| Galectin-2       | 12.37065068 | 12.39845782 | 0.96624402  | 0.9861528 | 0.980910124  | 3957   | P05162 | 2255.03547 | 3431.7511 | 9726.7466 | 5958.168152 | 9623.138944 | 2742.946181 |
| Nidogen-1        | 16.51631841 | 16.51009827 | 0.973677971 | 0.9894187 | 1.004320779  | 4811   | P14543 | 107363.397 | 94420.597 | 100568.21 | 91552.72156 | 106824.1421 | 83128.45869 |
| LIGHT            | 9.425303784 | 9.430931459 | 0.976463321 | 0.9899628 | 0.996106791  | 8740   | O43557 | 688.143989 | 849.96163 | 567.27247 | 793.9217003 | 623.8758472 | 661.0056213 |
| CD30             | 9.990186236 | 9.984803989 | 0.981169954 | 0.9923883 | 1.003737657  | 943    | P28908 | 844.671037 | 1219.6714 | 1021.8644 | 841.6452078 | 1281.188858 | 961.8968164 |
| NOV              | 15.42680314 | 15.43095444 | 0.98336656  | 0.9923883 | 0.997126671  | 4856   | P48745 | 48275.3349 | 36548.34  | 47800.526 | 55988.38619 | 38078.69089 | 40432.4992  |
| LYVE-1           | 15.4338311  | 15.43202639 | 0.991007611 | 0.9953597 | 1.001251709  | 10894  | Q9Y5Y7 | 40275.2894 | 46319.786 | 41524.382 | 48330.77255 | 38672.92293 | 46221.93989 |
| FOLR1            | 7.940002262 | 7.936289089 | 0.99309754  | 0.9953597 | 1.00257709   | 2348   | P15328 | 367.172711 | 180.59238 | 415.84848 | 323.5817587 | 216.5931309 | 207.0721334 |
| CD6              | 11.06568858 | 11.06963837 | 0.990215391 | 0.9953597 | 0.997265962  | 923    | P30203 | 2611.17334 | 1555.8572 | 1866.6698 | 1576.875743 | 2893.293866 | 2173.023055 |
| Thrombospondin-2 | 10.68141933 | 10.68255101 | 0.997438087 | 0.9974381 | 0.999215891  | 7058   | P35442 | 2638.58297 | 2113.3067 | 993.51313 | 1854.140803 | 1427.571061 | 1674.043631 |

| Table S3 human serum proteomics (cachexia tumor patients VS health) |           |             |             |           |             |          |           |          |          |          |             |           |           |
|---------------------------------------------------------------------|-----------|-------------|-------------|-----------|-------------|----------|-----------|----------|----------|----------|-------------|-----------|-----------|
| proteinID                                                           | AveExp.H  | AveExp.CA   | P.Value     | adj.P.Val | foldchange  | entrezID | uniprotID | healthy1 | healthy2 | healthy3 | Cachexia1   | Cachexia2 | Cachexia3 |
| MMP-8                                                               | 11.447152 | 13.98572821 | 3.80E-05    | 0.0167235 | 0.17211245  | 4317     | P22894    | 3575.445 | 1673.682 | 3633.329 | 12674.4471  | 14095.58  | 21758.251 |
| Pentraxin 3                                                         | 12.251072 | 14.29749089 | 8.97E-05    | 0.019728  | 0.24208421  | 5806     | P26022    | 6407.319 | 3803.219 | 4750.228 | 13675.7639  | 21042.08  | 21764.035 |
| IL-18                                                               | 11.259644 | 15.05302206 | 0.000245202 | 0.035963  | 0.07302942  | 3606     | Q14116    | 2661.096 | 2985.196 | 1853.084 | 50455.0063  | 15704.466 | 91400.22  |
| Lipocalin-2                                                         | 8.1881088 | 15.31176337 | 0.000682086 | 0.036293  | 1.87123554  | 3934     | P80188    | 29864.82 | 38256.68 | 36525.57 | 64134.3917  | 61388.23  | 17543.11  |
| Flt-3L                                                              | 12.079889 | 10.15612848 | 0.000694191 | 0.0436348 | 3.79410636  | 2322     | P36888    | 3202.142 | 4688.178 | 5400.987 | 1139.70461  | 728.9301  | 1938.4534 |
| BLC                                                                 | 9.755527  | 13.89234015 | 0.000636355 | 0.0436348 | 0.05684639  | 10563    | O43927    | 831.644  | 946.1068 | 817.9995 | 38878.2307  | 2962.958  | 3491.2504 |
| GDF-15                                                              | 15.586497 | 16.89084564 | 0.000607755 | 0.0436348 | 0.40490392  | 9518     | Q99988    | 34434.73 | 55886.1  | 61898.71 | 129361.845  | 121605.55 | 137109.82 |
| MIF                                                                 | 11.156653 | 13.13562342 | 0.000400471 | 0.0436348 | 0.25367079  | 4283     | Q07325    | 2228.116 | 2709.079 | 1968.459 | 6677.85723  | 6299.5218 | 9483.1914 |
| uPAR                                                                | 11.713253 | 13.72706431 | 0.000848076 | 0.0466442 | 0.24761812  | 5329     | Q03405    | 4690.896 | 2727.877 | 2955.578 | 19982.4543  | 6501.1672 | 18124.508 |
| TNF RI                                                              | 14.218683 | 15.26443842 | 0.001351632 | 0.0660798 | 0.48439112  | 7132     | P19438    | 22957.84 | 18771.82 | 16078.43 | 51683.8896  | 33454.153 | 37658.412 |
| Syndecan-1                                                          | 13.105013 | 14.47821993 | 0.001720107 | 0.0756847 | 0.38603207  | 6382     | P18827    | 8225.019 | 7213.098 | 11523.81 | 24517.7419  | 18352.147 | 23785.978 |
| Follistatin                                                         | 12.06037  | 12.88956997 | 0.002424575 | 0.096983  | 0.05284122  | 10468    | P19883    | 4195.826 | 3933.592 | 4717.224 | 18161.71704 | 8678.1773 | 8257.1638 |
| CA125                                                               | 12.216685 | 16.59195065 | 0.006339037 | 0.2324314 | 0.0481852   | 94025    | Q8WX17    | 5116.145 | 4711.023 | 4471.294 | 70034.3265  | 9642.72   | 596038.35 |
| MIG                                                                 | 7.5635896 | 8.934310314 | 0.008330945 | 0.2443744 | 0.38669801  | 4283     | Q07325    | 233.1975 | 220.3632 | 129.5914 | 606.73943   | 633.18267 | 653.71687 |
| HGF                                                                 | 10.884122 | 12.46029132 | 0.007862777 | 0.2443744 | 0.35637129  | 3082     | P14210    | 1925.968 | 2012.536 | 1738.835 | 2686.88882  | 4236.5703 | 12189.073 |
| AgRP                                                                | 10.436458 | 11.44612125 | 0.007253539 | 0.2443744 | 0.49666221  | 181      | O00253    | 1365.403 | 1411.988 | 1377.299 | 4755.23874  | 1894.4504 | 2704.9048 |
| TRAIL R3                                                            | 13.227357 | 13.85005404 | 0.01101442  | 0.3018331 | 0.64945576  | 8794     | O14798    | 8763.721 | 9299.256 | 10819.84 | 18048.5871  | 11472.655 | 13428.663 |
| FSH                                                                 | 15.131215 | 11.95727089 | 0.011661733 | 0.3018331 | 9.02510475  | 2488     | P01225    | 37812.35 | 32481.29 | 37630.93 | 15198.0003  | 1612.9444 | 12665.562 |
| IGFBP-1                                                             | 13.65296  | 15.28973734 | 0.012636503 | 0.3088923 | 0.321574    | 3484     | P08833    | 5775.989 | 12322.51 | 30019.34 | 46429.6516  | 28849.883 | 46165.166 |
| CEACAM-1                                                            | 13.825494 | 14.82871394 | 0.014954276 | 0.3144303 | 0.49888532  | 634      | P13688    | 22138.47 | 12011.77 | 11503.16 | 32405.4751  | 21806.701 | 32942.887 |
| HVEM                                                                | 12.182294 | 12.95357896 | 0.022227804 | 0.3144303 | 0.35637129  | 8764     | Q92956    | 5220.952 | 3606.988 | 5327.557 | 11760.7927  | 5831.191  | 7913.9329 |
| RAGE                                                                | 14.743397 | 13.98433187 | 0.02339352  | 0.3144303 | 1.69239384  | 177      | Q15109    | 32113.63 | 35515.9  | 18090.57 | 21121.0136  | 17258.132 | 13724.88  |
| OPG                                                                 | 11.271295 | 12.39715924 | 0.014635648 | 0.3144303 | 0.45822745  | 4982     | O00300    | 2937.909 | 2085.145 | 2461.992 | 7400.10987  | 4093.3229 | 5258.9494 |
| MIP-3b                                                              | 11.964058 | 10.34170119 | 0.021116372 | 0.3144303 | 3.07877556  | 6363     | Q99731    | 5393.357 | 4467.385 | 2644.639 | 953.20515   | 807.45709 | 3899.1626 |
| BMP-9                                                               | 11.685904 | 10.32583363 | 0.016670912 | 0.3144303 | 2.56697661  | 2658     | Q9UK05    | 2694.033 | 3601.797 | 3682.144 | 1939.80235  | 1805.3697 | 572.99218 |
| IL-24                                                               | 8.4499662 | 7.198637649 | 0.018176941 | 0.3144303 | 2.38060548  | 11009    | Q13007    | 416.0119 | 262.7747 | 387.7749 | 271.501998  | 209.06654 | 87.907774 |
| DLL1                                                                | 9.9991209 | 9.1384091   | 0.02429689  | 0.3144303 | 0.45398351  | 28514    | O00548    | 313.3099 | 256.2809 | 206.0906 | 771.115034  | 369.52381 | 1061.2699 |
| HAI-2                                                               | 9.4282743 | 11.50266829 | 0.022219574 | 0.3144303 | 0.23743524  | 6691     | P20155    | 754.4573 | 755.4386 | 571.2641 | 8596.36894  | 965.11383 | 5326.3099 |
| CHI3L1                                                              | 13.125348 | 13.68759394 | 0.019779924 | 0.3144303 | 0.67724685  | 1116     | P36222    | 6554.481 | 10581.79 | 10283.08 | 12734.6965  | 13052.174 | 12443.37  |
| P-Cadherin                                                          | 12.415273 | 13.9612849  | 0.015216959 | 0.3144303 | 0.35637129  | 1001     | P22223    | 6160.512 | 6923.5   | 3818.736 | 41897.5397  | 10706.37  | 11058.77  |
| Follistatin-like 1                                                  | 12.171917 | 11.58958398 | 0.023283053 | 0.3144303 | 1.49726884  | 11167    | Q12841    | 4433.844 | 3865.454 | 5728.879 | 3123.32027  | 3341.3042 | 2755.0937 |
| Renin                                                               | 12.784578 | 15.30248134 | 0.020057358 | 0.3144303 | 0.17459651  | 5972     | P00797    | 19188.27 | 6165.554 | 2967.407 | 16657.7915  | 38141.938 | 25470.845 |
| BMPIR-1B                                                            | 7.9137425 | 2.113807939 | 0.023633619 | 0.3144303 | 55.7127099  | 658      | O00238    | 804.0383 | 44.59347 | 381.0344 | 349.976774  | 0         | 0         |
| Cystatin B                                                          | 14.320219 | 14.74599047 | 0.021318656 | 0.3144303 | 0.74444031  | 1476     | P04080    | 19948.18 | 19930.96 | 21525.38 | 29721.1045  | 23059.429 | 30779.04  |
| Galectin-9                                                          | 13.309701 | 14.36317622 | 0.022149492 | 0.3144303 | 0.4818063   | 3965     | O00182    | 10737.51 | 12415.33 | 7849.922 | 26912.9875  | 15077.898 | 17355.208 |
| IL-1ra                                                              | 12.02864  | 13.18148762 | 0.027579259 | 0.3444461 | 0.44973658  | 3572     | P18510    | 4503.935 | 3447.013 | 4694.552 | 4400.35726  | 9272.9468 | 19822.254 |
| SDF-1b                                                              | 9.23952   | 8.220550518 | 0.028181951 | 0.3444461 | 2.02647088  | 6387     | P48061    | 595.9319 | 611.8136 | 602.7606 | 266.916257  | 441.26737 | 457.57678 |
| TRAIL R4                                                            | 10.21797  | 9.847399406 | 0.030543649 | 0.344595  | 1.29286426  | 8793     | Q9UBN6    | 1245.66  | 1203.207 | 1124.375 | 868.65943   | 1019.2621 | 898.27625 |
| Prolectin                                                           | 11.388212 | 13.33731596 | 0.029764822 | 0.344595  | 0.25897706  | 5617     | P01236    | 3927.965 | 4054.491 | 1207.534 | 9543.25022  | 14738.428 | 9046.7744 |
| Aggrecan                                                            | 12.842572 | 12.1059895  | 0.030024749 | 0.344595  | 1.6662239   | 176      | P16112    | 5890.114 | 8639.768 | 7783.813 | 6517.73297  | 3177.0602 | 5227.1081 |
| Proteasins                                                          | 5.579057  | 7.368146125 | 0.032522672 | 0.3577494 | 0.28935469  | 5652     | Q16651    | 82.04764 | 85.42413 | 14.22048 | 197.279292  | 86.895745 | 386.4147  |
| LOX-1                                                               | 11.09723  | 12.68297588 | 0.035931894 | 0.3764294 | 0.33315241  | 4973     | P78380    | 3180.864 | 1347.034 | 2450.404 | 2319.22609  | 4562.2598 | 15293.137 |
| CD23                                                                | 11.383536 | 9.604238927 | 0.035248802 | 0.3764294 | 3.43258882  | 2208     | P06734    | 2118.777 | 3071.877 | 2926.67  | 716.823584  | 463.61361 | 351.83135 |
| I-309                                                               | 7.3436833 | 7.977056436 | 0.038795646 | 0.3863376 | 0.64466735  | 6346     | P22362    | 173.6605 | 118.6674 | 204.0388 | 189.461014  | 223.83372 | 311.55704 |
| TIMP-1                                                              | 16.754062 | 16.40675378 | 0.041267875 | 0.3863376 | 1.27218478  | 7076     | P01033    | 105289.5 | 109951   | 116635.2 | 91132.3357  | 96316.948 | 81237.565 |
| IP-10                                                               | 11.015484 | 11.82388221 | 0.040717246 | 0.3863376 | 0.57101553  | 3672     | P02778    | 1805.221 | 2955.854 | 1660.011 | 3799.32532  | 3276.5963 | 4697.3074 |
| Neprilysin                                                          | 11.271943 | 9.704433269 | 0.039993973 | 0.3863376 | 2.96392694  | 4311     | P08473    | 2365.75  | 2538.855 | 2514.461 | 1236.67402  | 435.59861 | 894.38202 |
| Pref-1                                                              | 9.3786022 | 9.978826172 | 0.04069006  | 0.3863376 | 42.2176996  | 8788     | P80370    | 438.9294 | 407.4961 | 1640.16  | 733.416461  | 83.147593 | 0         |
| IL-10                                                               | 10.701857 | 11.19145214 | 0.044184635 | 0.3878419 | 0.171222493 | 3586     | P22301    | 1612.849 | 1699.867 | 1682.475 | 1647.85885  | 2313.9498 | 2950.8553 |
| IL-16                                                               | 11.607903 | 14.12519718 | 0.044954404 | 0.3878419 | 0.17467022  | 3603     | Q14005    | 1814.605 | 4244.28  | 3944.053 | 10698.9893  | 4481.0244 | 163881.06 |
| hCgb                                                                | 12.524542 | 11.57167683 | 0.044655765 | 0.3878419 | 1.93571358  | 1082     | P01233    | 4692.557 | 4641.697 | 9385.775 | 3129.73095  | 2566.7085 | 3796.3483 |
| Midkine                                                             | 11.912496 | 12.68325315 | 0.043733308 | 0.3878419 | 0.58610967  | 4282     | P14174    | 4790.799 | 3802.987 | 3141.809 | 6600.49655  | 5651.8858 | 8785.146  |
| IL-5                                                                | 10.558408 | 11.21230848 | 0.047423528 | 0.3882864 | 0.63556429  | 3567     | P05113    | 1640.41  | 1450.006 | 1438.845 | 1552.09003  | 1922.8334 | 3308.3166 |
| DAN                                                                 | 9.409698  | 10.22779978 | 0.047653329 | 0.3882864 | 0.56718772  | 4681     | P41271    | 726.5609 | 744.5434 | 579.045  | 1651.4977   | 615.15148 | 1545.408  |
| SIGIRR                                                              | 6.3216762 | 2.496790782 | 0.046337998 | 0.3882864 | 14.171155   | 59307    | Q6IA17    | 73.70875 | 90.95157 | 73.49238 | 11.2003727  | 82.188362 | 0         |
| BMP-5                                                               | 12.224673 | 11.37087439 | 0.050983515 | 0.3946115 | 1.80950887  | 653      | P22003    | 6588.032 | 3866.059 | 4318.192 | 238.68953   | 3987.2317 | 2741.2125 |
| b-NGF                                                               | 11.095394 | 10.3764451  | 0.057042276 | 0.3946115 | 1.6459823   | 4803     | P01138    | 1564.116 | 1898.215 | 3522.859 | 1153.24387  | 1910.0288 | 1307.1339 |
| VEGF R3                                                             | 10.583358 | 11.40403815 | 0.057212139 | 0.3946115 | 0.56617515  | 2324     | P35916    | 1259.72  | 1072.256 | 2668.335 | 3491.93341  | 3379.975  | 2455.3885 |
| GRO                                                                 | 11.711111 | 12.36534626 | 0.050431753 | 0.3946115 | 0.63541162  | 2919     | P09341    | 3689.372 | 3597.314 | 2837.028 | 6160.31168  | 4199.4228 | 7093.1741 |
| MDC                                                                 | 9.829288  | 8.377924516 | 0.055783909 | 0.3946115 | 2.73466387  | 6367     | O00626    | 1170.747 | 610.5806 | 1049.616 | 98.96       |           |           |

|             |            |             |             |           |             |        |            |          |          |          |             |           |           |
|-------------|------------|-------------|-------------|-----------|-------------|--------|------------|----------|----------|----------|-------------|-----------|-----------|
| Clusterin   | 10.265805  | 11.55735107 | 0.0920432   | 0.461575  | 0.40851297  | 1191   | P10909     | 1214.139 | 1403.817 | 1092.201 | 1028.6986   | 1766.0528 | 8784.3167 |
| Siglec-7    | 11.533482  | 11.04663407 | 0.08903669  | 0.461575  | 1.40137947  | 27036  | Q9Y9286    | 3697.038 | 2898.512 | 2428.269 | 1696.64314  | 1951.8273 | 3240.9724 |
| JAM-B       | 8.6197313  | 4.209762591 | 0.08335858  | 0.461575  | 1.212585115 | 58494  | P57087     | 353.1858 | 334.9155 | 150.6014 | 413.128586  | 282.08969 | 0         |
| GM-CSF      | 10.349346  | 11.27616108 | 0.093809316 | 0.4637764 | 0.52601847  | 1437   | P04141     | 1545.017 | 1064.774 | 1346.447 | 1024.99508  | 2014.5675 | 4362.3129 |
| IL-1 RII    | 15.209581  | 15.53440767 | 0.097401939 | 0.4701717 | 0.7983944   | 7850   | P27930     | 37752.92 | 36360.4  | 39628.42 | 48146.3134  | 46363.956 | 40450.11  |
| B7-H1       | 11.775256  | 11.19590243 | 0.098308621 | 0.4701717 | 1.49417977  | 29126  | Q9NZQ7     | 3833.611 | 4481.983 | 2504.114 | 2830.20001  | 2413.2689 | 2148.6041 |
| DNM-1       | 11.4753262 | 11.00414241 | 0.097169784 | 0.4701717 | 1.38628048  | 10666  | Q15762     | 4202.715 | 2617.746 | 2095.803 | 2237.70159  | 1901.5614 | 2085.3725 |
| NT-4        | 11.753729  | 10.89894171 | 0.099816394 | 0.4718048 | 1.8084915   | 4909   | P34130     | 3417.666 | 3985.456 | 3020.557 | 830.666008  | 3495.7397 | 2597.6063 |
| CD163       | 14.160583  | 10.91966722 | 0.100794662 | 0.4718048 | 0.59087109  | 9332   | Q86VB7     | 19262.34 | 26448.26 | 12053.11 | 42863.2921  | 43259.042 | 21079.948 |
| IL-17F      | 10.534183  | 9.029556223 | 0.103986452 | 0.4816215 | 2.83751319  | 112744 | Q96PD4     | 2161.329 | 1305.755 | 1152.983 | 252.950011  | 320.59276 | 1202.589  |
| IL-7        | 10.918638  | 11.43422689 | 0.106091463 | 0.4862525 | 0.69950735  | 3574   | P13232     | 2089.947 | 1875.781 | 1847.23  | 1790.53484  | 2251.3872 | 3890.1554 |
| IL-28A      | 10.655082  | 10.30898531 | 0.109875405 | 0.4953485 | 1.27111722  | 282616 | Q8IZJ0     | 1725.104 | 1368.941 | 1772.085 | 1362.21598  | 1339.7328 | 1323.6358 |
| OPN         | 13.097404  | 14.37722016 | 0.110327628 | 0.4953485 | 0.41184798  | 6696   | P10451     | 9488.201 | 7340.461 | 9662.227 | 80499.6975  | 10154.968 | 16005.273 |
| IL-12p40    | 9.2341499  | 8.593942595 | 0.123330628 | 0.529906  | 1.55855313  | 3593   | P29460     | 478.8375 | 723.5885 | 627.178  | 337.389633  | 301.5582  | 689.5919  |
| LAP(TGFB1)  | 14.14214   | 15.14955079 | 0.123220493 | 0.529906  | 0.49743826  | 7040   | P01137     | 24400.93 | 18736.1  | 12926.02 | 24050.8214  | 35513.402 | 42246.126 |
| Siglec-5    | 13.950804  | 17.60743492 | 0.120146675 | 0.529906  | 0.97029475  | 8778   | O15389     | 1922.222 | 8399.02  | 245764.9 | 154598.804  | 227746.42 | 223603.02 |
| TGFB2       | 11.620511  | 11.29494549 | 0.125250517 | 0.529906  | 1.25315549  | 7042   | P61812     | 3188.387 | 2828.82  | 3457.605 | 2650.9412   | 2475.3594 | 2727.7919 |
| IGF-2R      | 10.676651  | 11.24584977 | 0.124681339 | 0.529906  | 0.67399103  | 3482   | P11717     | 1189.677 | 1783.413 | 2062.894 | 4069.25594  | 1928.7061 | 1799.6607 |
| Cadherin-11 | 10.562191  | 10.06219782 | 0.125153828 | 0.529906  | 1.41420696  | 1009   | P55287     | 1944.158 | 1541.838 | 1150.685 | 1254.83506  | 1241.1923 | 1083.0807 |
| ErbB2       | 7.3450038  | 7.95321307  | 0.126627518 | 0.5306296 | 0.65901045  | 2064   | P04626     | 250.9428 | 139.8688 | 120.0829 | 206.759369  | 191.90568 | 314.78433 |
| IL-2        | 10.800414  | 11.19604793 | 0.130715479 | 0.5336177 | 0.76015539  | 3558   | P60568     | 1817.147 | 1737.852 | 1793.132 | 1664.96043  | 2018.7895 | 3318.346  |
| IL-12p70    | 9.4133698  | 9.965662188 | 0.135857192 | 0.5336177 | 0.68193567  | 3592   | P29459 & P | 688.8891 | 583.3697 | 785.4172 | 750.270501  | 662.48128 | 1771.8762 |
| TNFB        | 11.301558  | 11.69046712 | 0.137919002 | 0.5336177 | 0.76370681  | 4050   | Q06643     | 2664.177 | 2633.043 | 2289.735 | 2337.389633 | 2019.2025 | 4601.0918 |
| PDGF-AA     | 13.505287  | 14.36274462 | 0.131649799 | 0.5336177 | 0.55192417  | 5154   | P04085     | 15506.74 | 10274    | 9865.406 | 11372.9699  | 15363.817 | 36565.897 |
| IL-31       | 10.125389  | 8.805925201 | 0.133493899 | 0.5336177 | 2.49573361  | 386653 | Q6BEC2     | 2329.946 | 448.9182 | 1327.837 | 279.882901  | 354.37677 | 1236.2529 |
| MIP-3a      | 8.3664709  | 10.0085189  | 0.134763485 | 0.5336177 | 0.32040132  | 6364   | P78556     | 278.8939 | 344.2139 | 371.0441 | 322.387269  | 9039.1268 | 720.0718  |
| Albumin     | 15.809917  | 16.20640947 | 0.138255491 | 0.5336177 | 0.75970323  | 213    | P02768     | 56240.01 | 44804.02 | 75230.25 | 88585.1926  | 59022.046 | 80958.752 |
| GASP-1      | 15.840371  | 16.29222027 | 0.137536928 | 0.5336177 | 0.73110726  | 124857 | Q8TEU8     | 64805.38 | 51470.41 | 60547.09 | 109458.294  | 69781.756 | 101816.3  |
| Ck beta 8-1 | 10.37006   | 9.744517478 | 0.136255502 | 0.5336177 | 1.54279042  | 6368   | P55773     | 2271.5   | 1003.82  | 1014.09  | 1225.92354  | 1099.0635 | 728.62719 |
| CTACK       | 12.983558  | 13.48031202 | 0.144114425 | 0.5419688 | 0.70869965  | 10850  | Q9Y4X3     | 7201.218 | 7129.755 | 10343.74 | 9811.41535  | 9850.9765 | 12105.633 |
| NAP-2       | 16.313012  | 16.03155961 | 0.142084421 | 0.5419688 | 1.21541764  | 5473   | P02775     | 89407.88 | 82194.85 | 73431.29 | 74201.2076  | 70254.709 | 60532.342 |
| SP-D        | 10.246931  | 5.510696927 | 0.143933872 | 0.5419688 | 26.6531565  | 66421  | P35247     | 746.8759 | 1600.023 | 1497.56  | 1238.88256  | 3483.6546 | 0         |
| Shh-N       | 9.4975215  | 9.164688605 | 0.150220112 | 0.5554873 | 1.25948407  | 6469   | O15465     | 570.9959 | 685.7705 | 960.4174 | 513.185683  | 684.85084 | 520.17399 |
| TRAIL R2    | 13.155397  | 13.85642162 | 0.150234063 | 0.5554873 | 0.61513534  | 8795   | O14763     | 12029.04 | 6060.235 | 10414.48 | 26753.753   | 10892.483 | 19661.384 |
| IL-13       | 10.303232  | 10.67956981 | 0.153681279 | 0.5572712 | 0.70379063  | 3596   | P35225     | 1316.502 | 1218.867 | 1254.11  | 1169.992    | 1371.4053 | 2269.6217 |
| IL-34       | 5.8022627  | 7.380805026 | 0.154516108 | 0.5572712 | 0.33482002  | 146433 | Q6ZMJ4     | 123.1589 | 90.95157 | 14.22048 | 91.7666901  | 178.75333 | 148.79773 |
| CD58        | 9.4731088  | 5.161753203 | 0.154382006 | 0.5572712 | 1.8539691   | 965    | P19256     | 432.9393 | 643.5279 | 1282.509 | 2236.35411  | 732.89757 | 0         |
| Tie-2       | 9.7575191  | 8.632963675 | 0.159056678 | 0.5643947 | 1.28034343  | 7010   | Q02763     | 1430.338 | 499.6347 | 904.0128 | 879.729116  | 565.2448  | 504.80808 |
| TFPI        | 11.638204  | 12.69220231 | 0.158322706 | 0.5643947 | 0.48163116  | 7035   | P10646     | 1323.442 | 7373.26  | 3314.846 | 3654.5854   | 6759.0543 | 10640.439 |
| GDNF        | 10.378201  | 10.81897178 | 0.164506968 | 0.5707118 | 0.73674082  | 2668   | P39905     | 1640.365 | 1379.246 | 1039.609 | 1541.34537  | 1577.9952 | 3027.8316 |
| Insulin     | 12.262415  | 11.21318337 | 0.172132744 | 0.5707118 | 2.06942668  | 3630   | P01308     | 6323.137 | 2847.432 | 6582.496 | 852.087194  | 3489.6957 | 3259.6345 |
| gp130       | 12.997565  | 12.74892426 | 0.170792504 | 0.5707118 | 1.18808694  | 3572   | P40189     | 7881.034 | 8304.84  | 8354.042 | 5393.67357  | 7807.1782 | 7546.1754 |
| IL-21       | 10.429737  | 10.73763574 | 0.173598404 | 0.5707118 | 0.8078177   | 59067  | Q9HBE4     | 1670.338 | 1210.655 | 1294.83  | 1477.4709   | 1399.9027 | 1832.8048 |
| Leptin      | 14.011282  | 11.99215575 | 0.162711747 | 0.5707118 | 4.05338233  | 3952   | P41159     | 31458.65 | 22408.43 | 6385.513 | 383.782246  | 4309.4714 | 4639.2751 |
| DeR3        | 10.745336  | 10.46726015 | 0.176315443 | 0.5707118 | 1.21257669  | 8771   | O95407     | 1849.041 | 1702.463 | 1604.062 | 1584.50943  | 1478.6113 | 1362.4481 |
| ANG-4       | 7.5346986  | 8.518298528 | 0.167244735 | 0.5707118 | 0.50571626  | 51378  | Q9Y264     | 207.9423 | 147.1009 | 205.0283 | 237.36682   | 286.26368 | 1467.7715 |
| BAFF        | 7.0887882  | 8.205016777 | 0.176401824 | 0.5707118 | 0.46129814  | 10673  | Q9Y275     | 143.4522 | 147.33   | 116.7227 | 243.516898  | 114.40123 | 1332.9343 |
| TWEAK       | 8.5697607  | 8.113986714 | 0.170402391 | 0.5707118 | 1.37151844  | 8742   | Q43508     | 383.822  | 465.3102 | 304.7245 | 252.89325   | 481.04365 | 209.22288 |
| LRP-6       | 11.549469  | 10.60449617 | 0.175086479 | 0.5707118 | 1.92515199  | 4040   | O75581     | 4738.36  | 1868.735 | 3033.852 | 833.803231  | 970.25875 | 4276.9738 |
| Nectin-4    | 12.232441  | 11.92554023 | 0.16882924  | 0.5707118 | 1.23704729  | 81607  | Q96NY8     | 4785.414 | 6038.342 | 3853.739 | 4697.80911  | 4190.1707 | 3220.1072 |
| ICOS        | 8.5441774  | 4.725545659 | 0.172429392 | 0.5707118 | 14.1098596  | 29851  | Q9Y948     | 599.5773 | 231.7931 | 371.0677 | 722.09423   | 676.53065 | 0         |
| ICAM-3      | 5.9513728  | 6.88545867  | 0.184100666 | 0.5779369 | 0.523375    | 3385   | P32962     | 116.2576 | 115.3078 | 16.37032 | 94.3740928  | 93.551859 | 193.65622 |
| TSP-1       | 15.263529  | 14.96621839 | 0.185202498 | 0.5779369 | 1.22885154  | 7057   | P07996     | 34619.85 | 50137.57 | 35060.5  | 37480.9275  | 36562.139 | 29837.852 |
| PSMA        | 6.3821794  | 3.68948297  | 0.181278292 | 0.5779369 | 6.47657494  | 2346   | Q04609     | 78.37387 | 89.19284 | 80.06487 | 16.2914512  | 88.804144 | 16.717413 |
| Perostin    | 13.384765  | 12.91082949 | 0.181925212 | 0.5779369 | 1.38889352  | 10631  | O15063     | 13808.8  | 8630.388 | 10264.49 | 7007.6732   | 5366.2685 | 10897.219 |
| JAM-A       | 7.6445143  | 4.311653114 | 0.184714765 | 0.5779369 | 10.0760705  | 50848  | Q9Y624     | 109.3045 | 170.361  | 422.8178 | 425.834429  | 363.32438 | 0         |
| IL-17B      | 11.32058   | 11.81454651 | 0.188308354 | 0.5794103 | 0.71007015  | 27190  | Q9YHFF5    | 2589.544 | 2448.171 | 2635.892 | 2951.62614  | 2357.514  | 5535.5077 |
| Leptin R    | 6.3712385  | 4.087592819 | 0.187606    | 0.5794103 | 4.86906807  | 3953   | P48357     | 78.14061 | 67.68535 | 79.82587 | 0           | 88.549691 | 9.6986516 |
| IGFBP-3     | 14.242455  | 13.77668469 | 0.194975809 | 0.5916507 | 1.38105413  | 3486   | P17936     | 14256.83 | 22910.77 | 22288.78 | 13332.3784  | 22395.418 | 8449.2288 |
| TLR4        | 10.266621  | 7.092606209 | 0.194042377 | 0.5916507 | 9.02554756  | 7099   | O00206     | 3575.671 | 849.8308 | 613.2711 | 652.275189  | 617.74071 | 857.50734 |
| MMP-1       | 8.4466739  | 10.2040287  | 0.190756422 | 0.6020057 | 0.29579     | 4312   | P03956     | 685.6816 | 144.3689 | 424.4806 | 1992.34501  | 152.96614 | 2112.3103 |
| TF          | 7.8977007  | 7.339865694 | 0.20171219  | 0.6037644 | 1.47205854  | 2152   | P13726     | 304.9816 | 262.1767 | 167.4192 | 158.077988  | 184.22407 | 202.77839 |
| PD-1        | 10.191389  | 8.860830458 | 0.203635273 | 0.6054022 | 2.51500035  | 5133   | Q15116     | 2801.596 | 709.6033 | 801.7007 | 235.002623  | 283.74509 | 840.87826 |
| PDGF-AB     | 10.612024  | 11.85446752 | 0.20707972  | 0.6074338 | 0.42265612  | 767790 | Q08CD2     | 1936.842 | 1167.603 | 1691.883 | 1025.25196  | 2353.0212 | 10967.366 |
| CD48        | 5.272374   | 1.899169963 | 0.205801902 | 0.6074338 | 10.3618095  | 962    | P09326     | 386.5591 | 0        | 147.9671 | 0           | 192.56575 | 0         |
| C5a         | 12.829331  | 13.55518331 | 0.211033525 | 0.6149321 | 0.60463971  | 727    | P01031     | 13918.6  | 2729.04  | 10143.83 | 19002       |           |           |

|               |           |             |             |           |            |           |        |          |          |          |             |           |           |
|---------------|-----------|-------------|-------------|-----------|------------|-----------|--------|----------|----------|----------|-------------|-----------|-----------|
| EG-VEGF       | 11.069558 | 10.30532315 | 0.292407876 | 0.6929649 | 1.69846938 | 84432     | P58294 | 6206.19  | 2030.633 | 786.1672 | 669.517082  | 2212.8068 | 1128.6179 |
| SCF           | 10.660143 | 11.19239595 | 0.270932155 | 0.6929649 | 0.69147426 | 4254      | P21583 | 1832.722 | 1978.328 | 1166.394 | 1949.32797  | 5060.4896 | 2310.6583 |
| TGFa          | 11.080511 | 11.75709841 | 0.283803937 | 0.6929649 | 0.62564335 | 7039      | P01135 | 3544.368 | 1360.156 | 2103.405 | 1625.91005  | 2228.4312 | 6565.0254 |
| CA15-3        | 12.739261 | 13.05202276 | 0.292935155 | 0.6929649 | 0.80509934 | 4582      | P15941 | 5282.481 | 8093.779 | 7473.366 | 6439.55615  | 8512.6622 | 11447.41  |
| CRP           | 14.385992 | 14.61935507 | 0.29182981  | 0.6929649 | 0.85064954 | 1401      | P02741 | 19117.23 | 17922.9  | 28638.46 | 28337.90043 | 22983.047 | 27094.539 |
| ADAM9         | 11.577521 | 12.15793511 | 0.279635477 | 0.6929649 | 0.66877163 | 8754      | Q13443 | 2478.78  | 2884.392 | 3988.56  | 9833.00447  | 2865.0768 | 4901.7767 |
| LDL R         | 9.6173548 | 10.298109   | 0.283372793 | 0.6929649 | 0.62383907 | 3949      | P01130 | 798.7624 | 825.323  | 732.206  | 3271.97207  | 668.16575 | 1106.0749 |
| CA9           | 6.8640845 | 6.607650847 | 0.292432531 | 0.6929649 | 1.19452221 | 768       | Q16790 | 96.62211 | 133.9149 | 119.0218 | 95.7122759  | 90.585316 | 105.40903 |
| IL-1 F5       | 7.0415042 | 5.137249772 | 0.279035346 | 0.6929649 | 3.74315394 | 26525     | Q9UBH0 | 301.7161 | 91.07719 | 81.02087 | 0           | 85.496253 | 174.3205  |
| ADAM12        | 9.1682117 | 6.775228566 | 0.290187121 | 0.6929649 | 5.25242319 | 8038      | O43184 | 279.1372 | 689.8052 | 982.9972 | 798.203679  | 627.94287 | 285.36467 |
| Cadherin-4    | 10.399961 | 7.61007822  | 0.288135674 | 0.6929649 | 6.91573814 | 1002      | P55283 | 2825.487 | 587.2635 | 1482.482 | 2944.04438  | 562.17633 | 937.42486 |
| Cystatin A    | 10.787671 | 7.907538028 | 0.276834676 | 0.6929649 | 7.36217813 | 1475      | P01040 | 3296.762 | 1007.069 | 1660.605 | 3768.79195  | 925.20826 | 950.91576 |
| Kallikrein 5  | 11.917337 | 11.12683037 | 0.274723911 | 0.6929649 | 1.72968151 | 25818     | Q9Y337 | 3815.959 | 3493.852 | 4336.918 | 5058.43498  | 3125.5588 | 563.72692 |
| LIF           | 10.005603 | 10.22111512 | 0.295896187 | 0.6962263 | 0.86124051 | 3976      | P15018 | 1049.449 | 853.3987 | 1209.388 | 1159.88952  | 1051.7613 | 1164.3848 |
| Eotaxin-2     | 12.161429 | 12.74532544 | 0.297532727 | 0.6963532 | 0.66715966 | 6369      | O00175 | 6946.02  | 3710.075 | 3727.781 | 4760.83401  | 5158.7307 | 13430.77  |
| MMP-9         | 13.751108 | 14.32259657 | 0.306724492 | 0.7065905 | 0.67292193 | 4318      | P14780 | 16836.45 | 10827.06 | 14375.75 | 7817.7658   | 29596.347 | 37547.921 |
| MEPE          | 11.629841 | 11.20392577 | 0.304513528 | 0.7065905 | 1.34342457 | 56955     | Q9NQ76 | 2239.875 | 3455.291 | 4108.274 | 3398.2926   | 1900.3047 | 2064.1256 |
| CEACAM-5      | 0         | 2.896658623 | 0.305811305 | 0.7065905 | 0.13428233 | 1048      | P06731 | 0        | 0        | 0        | 3074.56232  | 0         | 0         |
| Axl           | 13.692176 | 13.94076135 | 0.309639172 | 0.7072182 | 0.84172125 | 558       | P30530 | 13077.13 | 12082.52 | 14672.3  | 21965.9345  | 14264.602 | 12471.339 |
| TPO           | 10.496963 | 10.71354521 | 0.311818915 | 0.7072182 | 0.86060198 | 7066      | P40225 | 1127.815 | 1792.114 | 1489.98  | 1436.57165  | 1652.8705 | 1963.5624 |
| GASP-2        | 6.6323094 | 7.196227829 | 0.31063017  | 0.7072182 | 0.67646234 | 117166    | Q96NZ8 | 83.27847 | 99.67116 | 114.0669 | 111.355658  | 105.28041 | 427.66784 |
| GITR          | 9.4973745 | 9.869034382 | 0.31937792  | 0.7097287 | 0.77289276 | 8784      | Q9Y5U5 | 782.013  | 696.7857 | 690.0235 | 1880.72449  | 785.76067 | 815.22920 |
| APRIL         | 9.0405584 | 8.695303302 | 0.317854976 | 0.7097287 | 1.27037556 | 8741      | O75888 | 609.6507 | 500.5399 | 475.8034 | 500.07782   | 450.39186 | 311.5951  |
| LAG-3         | 9.0460585 | 8.848327822 | 0.317279154 | 0.7097287 | 1.14689288 | 3902      | P18627 | 545.8802 | 512.5618 | 524.9203 | 559.787903  | 490.70051 | 467.64863 |
| Epo R         | 4.1705152 | 1.597872002 | 0.317238133 | 0.7097287 | 5.94898375 | 2057      | P19235 | 69.86004 | 81.40417 | 0        | 0           | 82.951722 | 0         |
| Persephin     | 12.196988 | 11.94154325 | 0.321598934 | 0.711073  | 1.19370378 | 5623      | O60542 | 3988.802 | 5297.812 | 4895.074 | 5645.00557  | 3971.1367 | 3720.4897 |
| Chemerin      | 14.247026 | 13.04261497 | 0.324610348 | 0.7141428 | 2.30443107 | 5919      | Q99969 | 17931.74 | 22425.58 | 18277.32 | 17127.7866  | 23117.145 | 631.14843 |
| TIMP-2        | 16.65531  | 16.88783654 | 0.327758438 | 0.7150127 | 1.8511433  | 7077      | P16035 | 89909.86 | 100031.1 | 122261.3 | 152893.206  | 136185.45 | 87790.807 |
| Kallikrein 14 | 12.051053 | 11.56414041 | 0.328255818 | 0.7150127 | 4.40144209 | 43847     | Q9POG3 | 4147.278 | 4094.605 | 4496.788 | 1932.52673  | 2630.8208 | 4643.318  |
| MICA          | 8.1787902 | 8.498539159 | 0.354478695 | 0.7189428 | 0.80120927 | 100507436 | Q29983 | 378.7239 | 222.2471 | 286.0317 | 263.880959  | 264.54317 | 462.45509 |
| IL-15         | 11.079568 | 11.24605759 | 0.36412889  | 0.7189428 | 0.89100806 | 3600      | P40933 | 2207.148 | 2147.598 | 2135.307 | 2112.89952  | 2175.0061 | 3024.1477 |
| PDGF-BB       | 15.917293 | 16.72714625 | 0.356711152 | 0.7189428 | 0.57043995 | 5155      | P01127 | 104065.7 | 63063.46 | 36110.99 | 4066.3312   | 79911.517 | 221408.92 |
| Lymphotactin  | 7.3710254 | 6.602794552 | 0.367163537 | 0.7189428 | 1.70317992 | 6375      | P47992 | 126.314  | 186.5735 | 188.9553 | 176.938129  | 229.70539 | 114.71988 |
| MSP           | 11.392807 | 11.59670518 | 0.359504296 | 0.7189428 | 0.86820128 | 4485      | P26927 | 2128.2   | 2391.462 | 3815.525 | 3287.54274  | 2961.3004 | 3080.3659 |
| IL-13 R2      | 10.25145  | 10.02665862 | 0.348769383 | 0.7189428 | 0.81380196 | 3598      | Q14627 | 1205.661 | 1263.813 | 1185.78  | 1039.55549  | 1196.6676 | 794.49335 |
| IL-23         | 11.478575 | 11.66603687 | 0.364291025 | 0.7189428 | 0.87814946 | 51561     | Q9NPF7 | 2702.073 | 2892.305 | 2970.218 | 2497.02273  | 2964.1656 | 3902.5644 |
| ST2           | 10.013801 | 10.42175773 | 0.367641185 | 0.7189428 | 0.75369024 | 9173      | Q01638 | 979.2118 | 970.0793 | 1159.885 | 2653.11774  | 1555.85   | 864.52162 |
| TREM-1        | 9.5939421 | 9.891192402 | 0.341888459 | 0.7189428 | 0.81380196 | 54210     | Q9N999 | 685.9292 | 830.412  | 807.0993 | 1635.86089  | 678.53661 | 756.07856 |
| B2M           | 15.34313  | 15.12644634 | 0.34929103  | 0.7189428 | 1.1620592  | 567       | P61769 | 48136.42 | 29869.03 | 49945.9  | 34759.5866  | 32458.48  | 44039.196 |
| GROa          | 7.7612752 | 8.168280089 | 0.365652734 | 0.7189428 | 1.75418748 | 2919      | P09341 | 235.0751 | 131.8415 | 324.6462 | 278.09903   | 151.19478 | 472.24134 |
| Nidogen-1     | 16.695906 | 16.51631841 | 0.35380814  | 0.7189428 | 1.13255994 | 4811      | P14543 | 109198.5 | 92591.65 | 118332.7 | 107363.397  | 94420.597 | 100568.7  |
| OSM           | 7.7478212 | 5.953094303 | 0.355024882 | 0.7189428 | 3.46949797 | 5008      | P13725 | 291.623  | 198.6744 | 168.9608 | 368.425372  | 180.7372  | 218.41648 |
| PSA-free      | 10.876374 | 12.0777514  | 0.358592277 | 0.7189428 | 0.43485997 | 354       | P07288 | 1988.183 | 1713.331 | 1946.938 | 2636.49608  | 3798.4835 | 32379.076 |
| Stiglec-9     | 10.30509  | 7.936160174 | 0.355827162 | 0.7189428 | 5.16557679 | 27180     | Q9Y336 | 1177.275 | 1172.708 | 1463.255 | 2236.65892  | 1235.4999 | 1299.4743 |
| Thyroglobulin | 11.616242 | 12.25733782 | 0.346163597 | 0.7189428 | 0.64122567 | 7038      | P01266 | 3759.118 | 2515.205 | 3269.124 | 3139.50351  | 2820.2209 | 16308.215 |
| Cathepsin L   | 11.027136 | 11.56890527 | 0.346559107 | 0.7189428 | 0.68692819 | 1514      | P07711 | 3313.601 | 1462.817 | 1872.176 | 5943.8202   | 2058.3122 | 2728.6916 |
| Cystatin C    | 16.680923 | 16.84897329 | 0.342767353 | 0.7189428 | 0.89004488 | 1471      | P10134 | 104510.5 | 95416.57 | 116299.6 | 121208.082  | 100936.42 | 126239.68 |
| WISP-1        | 7.7759087 | 5.948327152 | 0.345249067 | 0.7189428 | 3.54941575 | 55515     | Q9P6T7 | 219.6216 | 193.6141 | 244.2015 | 214.598448  | 183.19833 | 365.07348 |
| ANGPTL3       | 11.137955 | 10.95071034 | 0.355760013 | 0.7189428 | 1.13858717 | 27329     | Q9Y5C1 | 2160.996 | 2250.172 | 2350.322 | 1814.82399  | 1747.5841 | 2024.9764 |
| MMP-7         | 7.4420231 | 7.84931855  | 0.356211455 | 0.7189428 | 0.75403562 | 4316      | P09237 | 162.1126 | 222.6052 | 143.1608 | 194.479199  | 381.80693 | 122.50928 |
| LRIG3         | 11.185988 | 11.00886143 | 0.363211155 | 0.7189428 | 1.13062955 | 121227    | Q6UXM1 | 2508.431 | 2267.848 | 2220.125 | 2456.85341  | 1995.3074 | 1172.3133 |
| CD229         | 10.721979 | 8.146548501 | 0.337131153 | 0.7189428 | 5.95974661 | 4063      | Q9HBG7 | 1522.048 | 2351.725 | 1343.204 | 2966.22327  | 1118.7102 | 1181.0314 |
| NT-3          | 10.820648 | 10.35426803 | 0.37350303  | 0.7262765 | 1.38163793 | 4908      | P20783 | 1095.611 | 2395.114 | 2250.429 | 771.722743  | 2712.0788 | 875.91855 |
| IL-32 alpha   | 8.1993961 | 6.334384561 | 0.374692628 | 0.7262765 | 3.64270885 | 9235      | P24001 | 235.9106 | 429.6947 | 247.970  | 419.404777  | 283.75136 | 353.18126 |
| IGFBP-2       | 15.298799 | 15.44732069 | 0.376539369 | 0.7266549 | 0.90217472 | 3485      | P18065 | 35174.24 | 42610.19 | 43690.02 | 46184.638   | 48142.678 | 40354.623 |
| CD30          | 9.7913311 | 9.990186236 | 0.394031911 | 0.7310642 | 0.87124167 | 943       | P28908 | 712.6525 | 1058.692 | 918.9976 | 844.671037  | 1219.6714 | 1021.8644 |
| Fas           | 11.804439 | 11.56248561 | 0.386654852 | 0.7310642 | 1.18259253 | 355       | P25445 | 3521.095 | 3168.53  | 4097.968 | 3682.30759  | 4085.0562 | 2792.0033 |
| IL-21R        | 8.4814548 | 8.095983624 | 0.392461386 | 0.7310642 | 1.30628631 | 50615     | Q9HBE5 | 305.5539 | 703.851  | 210.3665 | 183.708792  | 260.5463  | 368.65326 |
| SCF R         | 15.322771 | 15.18176629 | 0.383359515 | 0.7310642 | 1.10267275 | 3815      | P10721 | 38165.41 | 38137.65 | 47291.73 | 36635.2691  | 42477.147 | 35268.284 |
| CXCL16        | 14.637617 | 14.48282936 | 0.391150383 | 0.7310642 | 1.11325805 | 58191     | Q9HZA7 | 27410.8  | 22455.64 | 26902.17 | 21259.3354  | 21953.143 | 24139.402 |
| MMP-13        | 12.999915 | 13.36391228 | 0.389800535 | 0.7310642 | 0.77700883 | 4322      | P45452 | 9046.316 | 6338.244 | 9582.762 | 11493.0148  | 7961.0835 | 7150.9349 |
| 2B4           | 10.920072 | 10.33561017 | 0.395439296 | 0.7310642 | 1.4994796  | 51744     | Q9BZW8 | 3378.698 | 1067.122 | 2014.158 | 1377.15417  | 872.86073 | 1734.4032 |
| TAC1          | 10.716929 | 10.34928941 | 0.391918016 | 0.7310642 | 1.29024029 | 23495     | O14836 | 1622.026 | 1956.419 | 1499.867 | 2407.95161  | 863.61205 | 1267.4454 |
| IL-1 F7       | 6.296103  | 4.788339408 | 0.382376711 | 0.7310642 | 2.85352187 | 27178     | Q9NZH6 | 74.17527 | 78.3892  | 80.30387 | 0           | 80.916097 | 80.366717 |
| CD27          | 11.20784  | 10.82591237 | 0.384984163 | 0.7310642 | 1.30308161 | 970       | P32970 | 2953.091 | 1292.682 | 3461.873 | 1959.72546  | 1815.6066 | 1664.7611 |
| PARC          | 15.813076 | 15.66249962 | 0.397966495 | 0.732658  | 1.11001256 | 6362      | P55774 | 55204.5  | 65699.57 | 52610.27 | 48994.5602  | 63479.    |           |



|               |           |             |             |           |            |        |        |          |          |          |            |           |           |
|---------------|-----------|-------------|-------------|-----------|------------|--------|--------|----------|----------|----------|------------|-----------|-----------|
| Ferritin      | 17.432015 | 17.59746612 | 0.441999293 | 0.7422889 | 0.89164992 | 2512   | P02792 | 162798   | 159106.9 | 213468.1 | 230889.067 | 161361.93 | 212964.37 |
| BMP-2         | 8.1698895 | 6.553575037 | 0.44454195  | 0.7437204 | 3.06590811 | 650    | P12643 | 359.5604 | 335.5046 | 195.8686 | 339.771594 | 397.77354 | 0         |
| MCP-1         | 12.882789 | 12.68145754 | 0.453793574 | 0.7472727 | 1.14975903 | 6347   | P13500 | 7591.293 | 8025.206 | 7069.246 | 7868.80086 | 4570.9673 | 8903.0992 |
| LIGHT         | 9.5704364 | 9.425303784 | 0.454678165 | 0.7472727 | 1.10583234 | 8740   | O43557 | 766.1994 | 677.8535 | 842.8806 | 688.143989 | 849.96163 | 567.27247 |
| IL-2 Ra       | 10.031376 | 9.893497022 | 0.455157028 | 0.7472727 | 1.10028627 | 3559   | P01589 | 986.047  | 1002.018 | 1156.68  | 856.719094 | 790.85701 | 1053.5727 |
| IL-3          | 10.306676 | 10.57155764 | 0.452217192 | 0.7472727 | 0.83226722 | 3562   | P08700 | 1542.048 | 1110.68  | 1183.396 | 1385.88809 | 907.52893 | 2701.0233 |
| BMP-1A        | 11.851997 | 11.69638546 | 0.452636678 | 0.7472727 | 1.11389376 | 657    | P36894 | 3603.184 | 3834.871 | 3652.835 | 4257.37777 | 2888.0309 | 3323.9242 |
| SOST          | 7.7642774 | 8.275497292 | 0.460083663 | 0.7507386 | 0.61080345 | 50964  | Q9BQB4 | 215.1149 | 181.9285 | 258.9412 | 311.66008  | 255.31802 | 2289.0963 |
| Layilin       | 5.5140179 | 4.421830439 | 0.460680497 | 0.7507386 | 2.44899091 | 143903 | Q6UX15 | 81.8727  | 86.30349 | 12.18898 | 107.803587 | 84.732894 | 11.995701 |
| FGF-4         | 10.546128 | 10.20029317 | 0.464525207 | 0.7521917 | 1.27088615 | 2249   | P08620 | 1798.967 | 2300.545 | 805.8978 | 823.385605 | 1490.2931 | 2048.8348 |
| Adiponectin   | 18.998888 | 19.11775283 | 0.464991222 | 0.7521917 | 0.92091217 | 9370   | Q15848 | 500734.3 | 465416.3 | 616956.2 | 636031.747 | 537477.73 | 541637.99 |
| MICB          | 9.2371398 | 8.93277693  | 0.474472257 | 0.7606002 | 1.23487321 | 4277   | Q29980 | 996.0058 | 518.9195 | 422.9696 | 543.910882 | 454.64455 | 578.19494 |
| VEGF R2       | 14.632325 | 14.46364785 | 0.473660354 | 0.7606002 | 1.12402768 | 3791   | P35968 | 24788.37 | 29958.73 | 22053.8  | 20751.8094 | 24523.288 | 19980.702 |
| TACE          | 7.5441073 | 6.019328501 | 0.475375128 | 0.7606002 | 0.29742594 | 6868   | P78536 | 524.1862 | 101.9218 | 119.2783 | 121.33813  | 111.20442 | 1284.2993 |
| sFRP-3        | 9.2185264 | 9.535571793 | 0.486198163 | 0.7750985 | 0.80271214 | 2487   | Q92765 | 655.2951 | 560.9391 | 572.2849 | 853.551837 | 588.878   | 894.50445 |
| ADAMTS13      | 11.020897 | 10.85365505 | 0.488496569 | 0.7759512 | 1.12929101 | 11093  | Q76LX8 | 2531.639 | 2328.37  | 1519.724 | 2097.14905 | 1565.5334 | 1927.7386 |
| IL-9          | 10.352938 | 10.21204277 | 0.493471802 | 0.7810345 | 1.10258891 | 3578   | P15248 | 1304.255 | 1257.23  | 1361.006 | 1166.93811 | 1354.1378 | 1124.8755 |
| ALCAM         | 14.980392 | 14.73015135 | 0.513069216 | 0.8091414 | 1.18940557 | 214    | Q13740 | 39178.42 | 33290.55 | 25896.04 | 34220.6874 | 32946.367 | 37118.829 |
| IGFBP-6       | 10.121843 | 15.22924437 | 0.516004224 | 0.8108453 | 0.92825872 | 3489   | P24592 | 37126.54 | 36160.32 | 33762.29 | 40407.358  | 46070.49  | 33672.747 |
| AMICA         | 15.954254 | 10.52895836 | 0.517835274 | 0.8108453 | 1.20210691 | 120425 | Q86Y19 | 3111.517 | 1062.128 | 1692.28  | 1922.6189  | 2555.6706 | 1805.7087 |
| EpCAM         | 11.103365 | 10.81590316 | 0.523751192 | 0.8172004 | 1.22049095 | 4072   | P16422 | 2101.204 | 1871.045 | 2705.116 | 2852.74523 | 2326.0643 | 2011.6753 |
| CD14          | 15.242079 | 15.36284669 | 0.541404002 | 0.8214864 | 0.91969787 | 929    | P08571 | 36928.54 | 39172.14 | 40234.21 | 34309.9076 | 44306.11  | 47994.971 |
| IL-1 RI       | 10.883937 | 10.98237899 | 0.538717465 | 0.8214864 | 0.93403401 | 3554   | P14778 | 1698.149 | 2108.741 | 1881.409 | 2025.14982 | 2157.9379 | 1727.5244 |
| G-CSF         | 9.3132897 | 9.55453776  | 0.538885134 | 0.8214864 | 0.84601314 | 1440   | P09919 | 735.4483 | 586.7371 | 593.858  | 476.401002 | 1522.2484 | 612.82742 |
| IL-17         | 9.979799  | 10.09190846 | 0.539606438 | 0.8214864 | 0.92523358 | 3605   | Q16552 | 1224.855 | 854.2439 | 981.0338 | 1189.53666 | 1085.0722 | 1187.4656 |
| TGFb1         | 12.740058 | 12.55804511 | 0.533971635 | 0.8214864 | 1.13446665 | 7040   | P01137 | 4867.469 | 6755.535 | 9733.275 | 4844.61833 | 8422.2328 | 5427.5478 |
| Galectin-7    | 11.43999  | 11.58785782 | 0.529796647 | 0.8214864 | 0.90258364 | 3963   | P47929 | 3264.714 | 2527.887 | 2595.768 | 3514.19008 | 2558.8407 | 2735.2587 |
| NCAM-1        | 16.847992 | 16.71123766 | 0.547035243 | 0.8214864 | 1.09942928 | 4684   | P13591 | 11440.39 | 104026.1 | 137923.5 | 128756.919 | 86690.689 | 120541.39 |
| IL-1 F9       | 5.447879  | 4.623233733 | 0.53698135  | 0.8214864 | 1.77109944 | 56300  | Q9NZH8 | 76.04131 | 85.54975 | 11.47198 | 4.83652458 | 84.605667 | 7.6568302 |
| IL-10 Ra      | 7.289748  | 7.100663025 | 0.543167089 | 0.8214864 | 1.14004044 | 3587   | Q13651 | 121.5261 | 180.5213 | 171.2432 | 107.67631  | 169.84747 | 181.97733 |
| Mer           | 6.9110419 | 7.146058222 | 0.544624391 | 0.8214864 | 0.84967538 | 10461  | Q12866 | 166.8943 | 97.23276 | 104.6818 | 197.661123 | 181.17063 | 99.538792 |
| Syndecan-4    | 14.27442  | 14.59996253 | 0.545170301 | 0.8214864 | 0.79799803 | 6385   | P31431 | 31877.55 | 19043.5  | 12816.91 | 12329.6994 | 19690.039 | 46955.529 |
| TSH           | 10.904414 | 10.69288871 | 0.549383018 | 0.8222059 | 1.15791156 | 7252   | P01222 | 2037.317 | 1483.46  | 2326.162 | 1651.4224  | 1231.0545 | 3023.5897 |
| Galectin-1    | 13.084654 | 12.87606756 | 0.56013935  | 0.8354621 | 1.15555577 | 3956   | P09382 | 9855.324 | 8626.019 | 7708.828 | 5118.08999 | 6110.5818 | 10912.614 |
| IL-17R        | 11.519349 | 11.33766983 | 0.572781965 | 0.8408395 | 1.1342033  | 23765  | Q96F46 | 3249.433 | 2561.192 | 3036.078 | 2407.45562 | 2173.051  | 4280.9876 |
| ICAM-1        | 17.423959 | 17.56134019 | 0.581797714 | 0.8408395 | 0.9091678  | 3383   | P05362 | 186466.2 | 197660.4 | 147528.3 | 144042.164 | 262117.28 | 222040.64 |
| TNF RII       | 14.822987 | 15.41030869 | 0.575493116 | 0.8408395 | 0.66557739 | 7133   | P20333 | 31207.25 | 28011.17 | 27852.19 | 47406.6637 | 40451.66  | 37083.002 |
| bFGF          | 11.526517 | 11.15269688 | 0.5877086   | 0.8408395 | 0.9577923  | 2247   | P09038 | 3673.763 | 2365.21  | 2951.564 | 5907.90722 | 3807.8409 | 650.72391 |
| FGF-7         | 10.420973 | 10.2262405  | 0.587550838 | 0.8408395 | 1.14451204 | 2252   | P21781 | 1300.178 | 2073.89  | 953.4315 | 977.954166 | 1406.063  | 1841.4918 |
| IL-18 BPa     | 9.474983  | 9.369512796 | 0.580182191 | 0.8408395 | 1.07584501 | 10068  | Q95998 | 653.8763 | 678.0481 | 809.4057 | 655.84759  | 822.70188 | 557.36431 |
| FABP2         | 14.358462 | 14.2472548  | 0.581496148 | 0.8408395 | 1.08013189 | 2169   | P12104 | 21154.63 | 22276.22 | 19664.12 | 25073.0094 | 21187.607 | 16005.092 |
| IL-1 R6       | 11.379918 | 11.27335413 | 0.588587619 | 0.8408395 | 1.07666068 | 8808   | Q9HB29 | 2945.395 | 2599.185 | 2469.555 | 2340.44666 | 2169.3191 | 3336.7    |
| Gas 1         | 6.7455338 | 6.623023557 | 0.585412231 | 0.8408395 | 1.08862742 | 2619   | P54826 | 154.8817 | 89.06721 | 86.99586 | 101.82157  | 90.839769 | 95.965605 |
| IGFBP-5       | 6.3663781 | 5.78234005  | 0.587997386 | 0.8408395 | 1.49903913 | 3488   | P24593 | 74.87503 | 87.43411 | 82.69387 | 11.9640345 | 86.514066 | 84.990815 |
| Angiotensinog | 12.200509 | 12.56379035 | 0.569451432 | 0.8408395 | 0.77739415 | 183    | P01019 | 2931.285 | 10546.54 | 3370.319 | 6180.05643 | 4629.1182 | 3511.9652 |
| FLRG          | 12.976668 | 13.46597557 | 0.578077999 | 0.8408395 | 0.71236705 | 10272  | Q95633 | 7380.814 | 7275.899 | 9748.667 | 55316.624  | 5025.0883 | 10079.915 |
| Tie-1         | 9.7217327 | 9.969554106 | 0.582408608 | 0.8408395 | 1.44216718 | 7075   | P35590 | 916.6083 | 700.8882 | 933.7042 | 1152.20543 | 811.41831 | 1629.8374 |
| NrCAM         | 11.375439 | 11.67461704 | 0.592510188 | 0.8437038 | 0.81271521 | 4897   | Q92823 | 2353.222 | 2902.253 | 2742.544 | 9306.99425 | 2354.3569 | 3594.8683 |
| LICAM-2       | 13.175389 | 13.70825089 | 0.594985385 | 0.8444954 | 0.69118239 | 10752  | O00533 | 6961.785 | 13085.9  | 8687.45  | 22394.4128 | 14883.563 | 3757.0003 |
| Contactin-2   | 9.9438952 | 9.734782124 | 0.614120096 | 0.8486096 | 1.15597728 | 6900   | Q02246 | 888.0242 | 650.0041 | 1649.954 | 551.584504 | 1212.0524 | 1159.4158 |
| EGF R         | 16.384866 | 16.4571087  | 0.613185764 | 0.8486096 | 0.95115816 | 1956   | P00533 | 80326.64 | 85704.8  | 91018.21 | 87489.4458 | 83044.65  | 101229.42 |
| VEGF          | 10.895398 | 11.11698224 | 0.612966053 | 0.8486096 | 0.85762289 | 7422   | P15692 | 2414.822 | 1932.643 | 1478.392 | 1821.2807  | 2903.4289 | 3551.1462 |
| ENA-78        | 12.800277 | 12.22248826 | 0.615241954 | 0.8486096 | 1.49256004 | 6374   | P42830 | 8041.86  | 6905.685 | 6532.141 | 949.860166 | 3152.6355 | 16819.056 |
| NOV           | 15.529884 | 15.42680314 | 0.607797739 | 0.8486096 | 1.07403155 | 4856   | P48745 | 42259.79 | 47909.72 | 52295.45 | 48275.3349 | 36548.34  | 47800.526 |
| aFGF          | 12.113227 | 12.032051   | 0.609190691 | 0.8486096 | 1.05787999 | 2246   | P05230 | 4508.717 | 4018.237 | 4796.786 | 4434.99098 | 4081.9611 | 4095.1668 |
| Cathepsin B   | 12.350029 | 12.10800718 | 0.608080451 | 0.8486096 | 1.18264926 | 1186   | P07858 | 5027.94  | 4773.324 | 5925.517 | 4007.56972 | 3887.535  | 6212.2416 |
| FGF-6         | 6.1712132 | 6.578960276 | 0.612785719 | 0.8486096 | 1.05379962 | 2251   | P10767 | 48.05064 | 90.95157 | 81.97687 | 101.185185 | 84.86012  | 97.369357 |
| CD99          | 13.607803 | 13.49099447 | 0.607133164 | 0.8486096 | 0.78433353 | 4267   | P14209 | 12703.85 | 12360.87 | 12387.45 | 9829.03858 | 11185.647 | 13785.645 |
| TGFb3         | 10.73853  | 10.48742954 | 0.631452521 | 0.85982   | 1.19011433 | 7043   | P10600 | 1410.062 | 1227.296 | 2876.461 | 1240.18869 | 3075.8754 | 1406.9706 |
| VEGF-D        | 10.825185 | 10.44538363 | 0.641711712 | 0.85982   | 1.30075491 | 2277   | O43915 | 698.747  | 338.263  | 2554.789 | 742.881146 | 1245.7045 | 5060.7301 |
| Fcg RIIBC     | 10.81236  | 10.47036691 | 0.640074913 | 0.85982   | 1.2675068  | 2213   | P31994 | 1126.676 | 1156.739 | 4452.891 | 1188.43655 | 2900.9019 | 572.82114 |
| CD97          | 12.379605 | 12.29751236 | 0.635035669 | 0.85982   | 1.05855247 | 976    | P48960 | 4967.096 | 5359.156 | 5681.377 | 6284.8044  | 4506.0574 | 4840.4371 |
| FGF-19        | 8.4115818 | 8.57738652  | 0.64271808  | 0.85982   | 0.89144219 | 9965   | Q95750 | 547.4778 | 313.7692 | 227.6897 | 287.144587 | 575.68884 | 399.13558 |
| Legumain      | 14.250065 | 14.44609417 | 0.634782627 | 0.85982   | 0.87294995 | 5641   | Q95538 | 12321.17 | 19575.6  | 30665.65 | 28969.9544 | 26877.124 | 19543.196 |
| Notch-1       | 10.28816  | 10.38601959 | 0.636474639 | 0.85982   | 0.93441857 | 4851   | P46531 | 1185.481 | 1430.214 | 1150.249 | 1495.98935 | 1444.6285 | 1280.4171 |
| Transferrin   | 18.382243 | 18.45729221 | 0.630593768 | 0.85982   | 0.94930948 | 7018   | P02787 | 333527.9 |          |          |            |           |           |

|                |           |             |             |           |            |        |        |          |          |          |             |            |            |
|----------------|-----------|-------------|-------------|-----------|------------|--------|--------|----------|----------|----------|-------------|------------|------------|
| VEGF R1        | 9.2110763 | 9.005909442 | 0.696699105 | 0.873355  | 1.1528197  | 2321   | P17948 | 608.4631 | 837.0877 | 406.5622 | 518.40958   | 942.64133  | 673.58124  |
| IL-10 Rb       | 10.06164  | 9.904093099 | 0.707358065 | 0.8841976 | 1.11538927 | 3588   | Q08334 | 678.235  | 1835.047 | 977.7296 | 599.745069  | 991.84954  | 1036.4894  |
| TIM-3          | 6.7644824 | 5.389540435 | 0.713562907 | 0.8894269 | 2.59357483 | 84868  | Q8TDQ0 | 0        | 1137.366 | 1127.898 | 3612.98812  | 853.41057  | 0          |
| CRTAM          | 10.712531 | 11.00968545 | 0.718305541 | 0.8928091 | 0.81385632 | 56253  | O95727 | 2315.548 | 971.5074 | 2096.228 | 6646.79438  | 1348.1886  | 1805.1056  |
| FAP            | 17.554333 | 17.50077219 | 0.720589066 | 0.8931245 | 1.03782311 | 2191   | Q12884 | 176092.7 | 196842.7 | 205719.2 | 203678.762  | 175941.08  | 191702.74  |
| BMPR-II        | 9.9226626 | 9.84475543  | 0.726117482 | 0.8974486 | 1.05548583 | 659    | Q13873 | 1034.054 | 1001.636 | 879.9499 | 1122.29264  | 1128.7222  | 864.6325   |
| IL-1 F6        | 6.2709938 | 5.716642687 | 0.733524639 | 0.9040664 | 1.46850797 | 27179  | Q9UHA7 | 72.77573 | 87.9366  | 69.19039 | 92.9121827  | 81.933909  | 9.1881962  |
| DKK-1          | 9.6734605 | 9.52124725  | 0.737408031 | 0.9063115 | 1.111273   | 22943  | O94907 | 873.7718 | 633.4117 | 980.159  | 966.420929  | 791.03915  | 1098.5369  |
| Endoglin       | 15.962955 | 15.88464957 | 0.755704512 | 0.9105108 | 1.05577686 | 2022   | P17813 | 63852.09 | 56970.15 | 71637.66 | 74830.1803  | 49760.533  | 81992.985  |
| Eotaxin        | 11.258641 | 11.09465238 | 0.770779964 | 0.9105108 | 1.12038045 | 6356   | P51671 | 2681.169 | 2124.969 | 2578.426 | 1553.55888  | 897.38194  | 5766.0554  |
| CCL28          | 13.255265 | 13.17681543 | 0.754020621 | 0.9105108 | 1.05588291 | 56477  | Q9NRJ3 | 12347.36 | 7140.524 | 10598.79 | 9530.55202  | 10694.866  | 7644.4502  |
| GCP-2          | 7.1520268 | 7.274522243 | 0.773581325 | 0.9105108 | 0.91859739 | 6372   | P80162 | 231.1137 | 120.663  | 100.8743 | 213.732955  | 244.95018  | 92.933843  |
| HCC-1          | 15.695453 | 15.74656825 | 0.748764491 | 0.9105108 | 0.96519008 | 6358   | Q16627 | 53473.46 | 52216.71 | 53509.92 | 50442.5923  | 58905.093  | 52483.511  |
| ICAM-2         | 14.18606  | 14.23267487 | 0.75391615  | 0.9105108 | 0.98205544 | 3384   | P13598 | 18595.78 | 18807.57 | 18512.78 | 21595.4655  | 19017.361  | 20338.929  |
| IL-2 Rb        | 10.33274  | 10.2787426  | 0.773934192 | 0.9105108 | 1.03813766 | 3560   | P14784 | 1253.761 | 1292.741 | 1320.253 | 1290.80005  | 1244.6314  | 1294.0115  |
| BCAM           | 11.579145 | 11.69700349 | 0.754052417 | 0.9105108 | 0.92155483 | 4059   | P50895 | 3367.51  | 3442.109 | 2468.572 | 2959.54886  | 2580.9993  | 6403.9869  |
| Decorin        | 16.903682 | 16.97128028 | 0.765820016 | 0.9105108 | 0.96522544 | 1634   | P07585 | 103847.7 | 128485.2 | 138129.2 | 145005.611  | 117222.051 | 13680.319  |
| IL-17B R       | 8.1029459 | 8.29524008  | 0.773376972 | 0.9105108 | 0.87521282 | 55540  | Q9NRM6 | 203.8799 | 440.157  | 228.9306 | 327.524339  | 300.85701  | 930.59364  |
| RANK           | 9.2316465 | 9.408500915 | 0.76077863  | 0.9105108 | 0.8846297  | 8792   | Q9Y6Q6 | 695.9338 | 562.3401 | 552.4079 | 827.643406  | 541.38625  | 6404.6643  |
| RBP4           | 18.579019 | 18.53566189 | 0.770860977 | 0.9105108 | 1.0350931  | 5950   | P02753 | 428400.3 | 402178.6 | 348541.3 | 410102.476  | 374053.73  | 399520.639 |
| IL-17C         | 5.2200277 | 4.835148012 | 0.770264872 | 0.9105108 | 1.30575091 | 27189  | Q9P0M4 | 74.64178 | 82.78603 | 7.169988 | 6.61840206  | 77.608206  | 11.612859  |
| RGM-B          | 11.297949 | 11.23545836 | 0.747010523 | 0.9105108 | 1.04426689 | 285704 | Q6NW40 | 2330.924 | 2534.736 | 2698.268 | 2299.658484 | 1937.8785  | 2517.3071  |
| Cystatin E M   | 15.533916 | 15.4368311  | 0.762516785 | 0.9105108 | 1.06960967 | 1474   | Q13582 | 68618.34 | 41644.03 | 37368.2  | 74304.1452  | 37825.268  | 38405.639  |
| Desmoglein 2   | 15.262257 | 15.31051775 | 0.745573572 | 0.9105108 | 0.96710162 | 1829   | Q14126 | 36945.6  | 38500.54 | 42670.61 | 45788.0829  | 40385.245  | 40617.119  |
| AR             | 10.648275 | 10.45276366 | 0.784633746 | 0.9206369 | 1.14513022 | 374    | P15514 | 1133.197 | 800.6887 | 4545.284 | 794.684015  | 1938.4484  | 2889.0502  |
| IL-13 R1       | 11.584035 | 11.62973628 | 0.79741843  | 0.9261933 | 0.96881893 | 3597   | P78552 | 3001.051 | 2889.294 | 3333.771 | 2910.33247  | 3128.5784  | 3224.449   |
| IL-27          | 9.970482  | 10.11978543 | 0.796192077 | 0.9261933 | 0.90168569 | 246778 | Q8NEV9 | 2291.681 | 632.0526 | 694.7591 | 929.446816  | 761.58908  | 1281.0738  |
| IL-1 F10       | 7.6143907 | 7.540113428 | 0.797789219 | 0.9261933 | 1.05283346 | 84639  | QRWVZ1 | 175.7581 | 181.275  | 232.5466 | 157.696157  | 187.15028  | 197.54622  |
| IL-1 R5        | 7.2409107 | 7.15609905  | 0.795074625 | 0.9261933 | 1.0654928  | 8809   | Q13478 | 163.0456 | 142.9598 | 145.5508 | 103.603448  | 107.37922  | 179.8079   |
| LYVE-1         | 15.47216  | 15.4338311  | 0.811149203 | 0.9303616 | 1.02692392 | 10894  | Q9Y5V7 | 46500.41 | 48450.82 | 41683.72 | 40275.2894  | 46319.786  | 41524.382  |
| IGF-1          | 11.098009 | 11.14632092 | 0.816897036 | 0.9303616 | 0.96706692 | 3479   | P05019 | 2552.117 | 2320.518 | 1775.877 | 1970.04912  | 2654.0822  | 2675.8889  |
| FAS L          | 10.274258 | 10.20598592 | 0.806047634 | 0.9303616 | 1.04845984 | 356    | P48032 | 1356.036 | 1102.809 | 1266.925 | 1791.67226  | 1049.2546  | 1183.1754  |
| IFNab R2       | 11.536078 | 11.57178194 | 0.808038619 | 0.9303616 | 0.97555544 | 3455   | P48551 | 3093.771 | 2940.541 | 2875.821 | 2718.29401  | 2834.1239  | 3364.7374  |
| Thrombomodulin | 13.159984 | 12.90540777 | 0.81668899  | 0.9303616 | 1.19298534 | 7056   | P07204 | 12521.04 | 5704.274 | 10731.43 | 33147.9809  | 5174.5456  | 18312.12   |
| Fetuin A       | 12.618688 | 12.67237101 | 0.815503976 | 0.9303616 | 0.96347331 | 197    | P02765 | 7612.998 | 5485.465 | 5954.319 | 6305.92306  | 4713.6436  | 7231.6388  |
| Pepsinogen I   | 17.173323 | 17.14068355 | 0.820409754 | 0.9303616 | 1.0228816  | 643834 | PODJD8 | 158856.5 | 133248.7 | 152538.4 | 150003.007  | 155175.37  | 139070.68  |
| uPA            | 11.51569  | 11.45883998 | 0.820095698 | 0.9303616 | 1.04019213 | 5328   | P00749 | 3193.272 | 2682.414 | 2927.496 | 3343.15595  | 2584.8425  | 3038.0578  |
| Thrombospondin | 10.766608 | 10.68141933 | 0.809349508 | 0.9303616 | 1.0608263  | 7056   | P35442 | 1439.437 | 2165.885 | 1692.891 | 2638.58297  | 2113.3067  | 993.51313  |
| Adipon         | 15.912538 | 15.88177924 | 0.824008532 | 0.9315446 | 1.02154929 | 1675   | P00746 | 61331.01 | 57908.83 | 66070.53 | 62234.7097  | 55959.12   | 64845.182  |
| Dkk-3          | 17.184474 | 17.14672889 | 0.825687289 | 0.9315446 | 1.02650806 | 27122  | Q9UBP4 | 158617.9 | 127415   | 163501.1 | 160853.314  | 136456.05  | 150911.63  |
| E-Cadherin     | 10.097971 | 10.02132979 | 0.83280269  | 0.9317693 | 1.05456016 | 999    | P12830 | 1230.913 | 882.7709 | 1208.085 | 1880.10538  | 804.21403  | 1172.4697  |
| Cripto-1       | 10.347152 | 10.52846166 | 0.836087084 | 0.9384651 | 0.88190209 | 6997   | P13385 | 738.3328 | 3324.659 | 897.8595 | 2335.82819  | 892.85607  | 1556.4916  |
| IGFBP-4        | 11.7512   | 11.62615684 | 0.840976806 | 0.9415516 | 1.09054041 | 3487   | P22692 | 2307.81  | 9118.317 | 1944.542 | 3967.18973  | 2837.0736  | 2528.9768  |
| CTLA4          | 8.2951371 | 8.333691183 | 0.844037799 | 0.9425803 | 0.97363023 | 1493   | P16410 | 351.8077 | 278.2565 | 313.5675 | 270.590823  | 345.67458  | 344.55736  |
| E-Selectin     | 13.190517 | 13.12264928 | 0.846421364 | 0.9428491 | 1.04816647 | 6401   | P16581 | 9278.802 | 7982.785 | 11026.48 | 13082.8377  | 5967.3346  | 8204.1021  |
| B7-1           | 10.05522  | 10.19080609 | 0.859115763 | 0.950424  | 0.91030026 | 941    | P33681 | 2163.836 | 945.6476 | 586.6998 | 756.138059  | 861.32659  | 1119.9533  |
| RANTES         | 17.752261 | 17.68016548 | 0.864021772 | 0.950424  | 1.05124273 | 6352   | P13501 | 253024.2 | 21210.11 | 201375.5 | 168615.905  | 213639.08  | 232883.42  |
| GH             | 13.073082 | 12.93475407 | 0.861077216 | 0.950424  | 1.10062857 | 2688   | PO1241 | 10416.03 | 9643.024 | 6369.406 | 15271.6259  | 10204.952  | 9169.7723  |
| MCP-4          | 8.2431125 | 8.29035069  | 0.862586476 | 0.950424  | 0.96781787 | 6357   | Q99616 | 318.0948 | 298.8031 | 289.7479 | 281.324705  | 448.17098  | 298.4388   |
| VE-Cadherin    | 7.6949694 | 7.783122198 | 0.862289942 | 0.950424  | 0.94072647 | 1003   | P33151 | 116.1582 | 271.518  | 277.6646 | 331.842479  | 254.99227  | 265.33256  |
| LIMPII         | 11.16437  | 11.29816748 | 0.868867932 | 0.9509997 | 0.91142932 | 950    | Q14108 | 5160.524 | 1598.533 | 1463.4   | 2575.9317   | 1350.694   | 3242.7331  |
| NGF R          | 11.478774 | 11.5767694  | 0.867660621 | 0.9509997 | 0.9343303  | 4804   | P08138 | 4439.063 | 3048.708 | 1715.795 | 3114.33249  | 3148.2747  | 4043.8004  |
| Dtk            | 13.194105 | 13.10563783 | 0.876877145 | 0.9518018 | 1.06323964 | 7301   | Q06418 | 6622.874 | 11567.41 | 10740.82 | 19567.3915  | 7429.6913  | 12179.413  |
| Trappin-2      | 16.062214 | 16.03772735 | 0.875623345 | 0.9518018 | 1.01711772 | 5266   | P19957 | 70070.1  | 76275.61 | 59935.91 | 62177.7526  | 65304.443  | 69083.327  |
| VEGF-C         | 9.9232708 | 9.92833382  | 0.878253451 | 0.9518018 | 1.04538725 | 7424   | P49767 | 1085.917 | 1172.446 | 827.6101 | 903.485409  | 1005.6622  | 646.37601  |
| Syndecan-3     | 10.036487 | 9.953575809 | 0.873545275 | 0.9518018 | 1.05915343 | 9672   | O75056 | 1133.263 | 1158.274 | 879.9499 | 648.819566  | 861.05595  | 667.68561  |
| PDGF Rb        | 11.262025 | 11.29667731 | 0.883441863 | 0.9532854 | 1.0762671  | 5159   | P09619 | 1855.933 | 2821.989 | 2825.462 | 2526.68308  | 2614.0188  | 1958.8781  |
| BMP-4          | 10.475808 | 10.43271494 | 0.906684611 | 0.9532854 | 0.93032069 | 652    | P12644 | 1538.321 | 1692.36  | 1106.948 | 1934.62715  | 1668.7836  | 1108.9715  |
| AFP            | 14.74307  | 14.67484024 | 0.900167646 | 0.9532854 | 1.04842964 | 174    | P02771 | 30444.46 | 18918.65 | 35799.05 | 65161.0319  | 19087.049  | 22376.017  |
| HGF R          | 17.070829 | 17.05599993 | 0.909954203 | 0.9532854 | 1.01033159 | 4233   | P08581 | 134418   | 142499.2 | 136212   | 137440.399  | 136190.75  | 133655.57  |
| Serpin A4      | 17.511154 | 17.53498954 | 0.966607348 | 0.9532854 | 0.98361427 | 5267   | P29622 | 148176.6 | 216905.6 | 202810.5 | 195902.091  | 164536.98  | 201144.99  |
| Troponin I     | 9.6208434 | 9.588238001 | 0.907940799 | 0.9532854 | 1.02285765 | 7135   | P19237 | 759.7891 | 789.1206 | 810.9507 | 986.760304  | 1023.4871  | 752.45901  |
| Dkk-4          | 7.0687536 | 7.108698524 | 0.903608429 | 0.9532854 | 0.97269209 | 27121  | Q9UBT3 | 112.6624 | 166.2002 | 126.3113 | 101.057908  | 173.02813  | 104.89857  |
| EDA-A2         | 6.3584299 | 6.54474756  | 0.964431303 | 0.9532854 | 0.87883994 | 1896   | Q92838 | 74.17527 | 91.83094 | 78.15287 | 112.944666  | 83.30431   | 82.374731  |
| TGFb RIII      | 11.56752  | 11.61665723 | 0.892983708 | 0.9532854 | 0.96651392 | 7049   | Q03167 | 2371.043 | 4109.152 | 2866.681 | 4906.27236  | 2732.6994  | 1791.1878  |
| CNTF           | 11.600043 | 11.56854589 | 0.901047198 | 0.9532854 | 1.02207197 | 1270   | P264   |          |          |          |             |            |            |

|       |           |             |             |          |            |      |        |          |         |          |            |           |           |
|-------|-----------|-------------|-------------|----------|------------|------|--------|----------|---------|----------|------------|-----------|-----------|
| CD84  | 11.56749  | 11.56123454 | 0.983472608 | 0.989838 | 1.00434552 | 8832 | Q9UIB8 | 2353.697 | 4236.38 | 2800.897 | 3834.27107 | 3840.8577 | 2442.3669 |
| ErbB4 | 2.7005724 | 2.652917417 | 0.98974501  | 0.989838 | 1.0335835  | 2066 | Q15303 | 0        | 0       | 273.7008 | 1563.69925 | 0         | 0         |
