# Supplementary material for: LCN2 secreted by tissue-infiltrating neutrophils induces the ferroptosis and wasting of adipose and muscle tissues in lung cancer cachexia
Source: Springer Nature journal article supplement (doi:10.1186/s13045-023-01429-1), 2023-03-27
Supplement: MOESM3 [file 24738850]

**Table S4 Mice serum proteomics**

| proteinID    | AveExp.L3   | AveExp.C    | P.Value     | adj.P.Val   | foldchange  | entrezID | uniprotID | cachexia 1  | cachexia 2  | cachexia 3  | control 1   | control 2   | control 3    |
|--------------|-------------|-------------|-------------|-------------|-------------|----------|-----------|-------------|-------------|-------------|-------------|-------------|--------------|
| G-CSF        | 14.1266613  | 11.9299173  | 9.08E-06    | 0.000605346 | 4.584453189 | 12985    | P09920    | 16721.83517 | 17847.05386 | 19174.45131 | 3122.59948  | 5300.92127  | 3585.742958  |
| OPG          | 13.47170859 | 11.03514559 | 1.37E-05    | 0.000684667 | 5.413505705 | 18383    | OR8712    | 13629.39567 | 9902.379927 | 10860.08654 | 1804.275352 | 1846.172017 | 2770.69061   |
| Lipocalin-2  | 18.11590256 | 15.9645994  | 0.000153357 | 0.003365305 | 2.396958788 | 16819    | P11672    | 705153.4908 | 541465.5407 | 602937.3132 | 228682.6153 | 267883.9624 | 27394.6621   |
| MCP-1        | 15.17824867 | 12.17513047 | 4.63E-05    | 0.001852884 | 8.017309702 | 20296    | P10148    | 29987.66714 | 41214.7187  | 41237.6421  | 5013.167741 | 4527.272464 | 4355.191946  |
| 4-1BB        | 13.91659938 | 12.90035345 | 0.000171144 | 0.004889829 | 2.022648926 | 21942    | P20334    | 13653.05706 | 15913.94818 | 17015.67147 | 6789.110909 | 7655.997275 | 8593.976059  |
| IGFBP-5      | 14.45506699 | 12.09315536 | 0.00015815  | 0.004889829 | 5.140520114 | 16011    | Q07079    | 27352.84661 | 15692.25301 | 26392.52026 | 4080.65784  | 3803.784332 | 5369.823416  |
| Activin A    | 9.83587524  | 11.11273701 | 0.000207973 | 0.005199313 | 0.412692383 | 16323    | Q04998    | 1226.977738 | 751.0301631 | 825.5233478 | 2333.016208 | 2284.216051 | 2034.965368  |
| CCL6         | 14.56342105 | 11.43831064 | 0.000332438 | 0.006995716 | 8.72429535  | 20305    | P27784    | 10480.81302 | 40620.93545 | 33332.63729 | 2219.372242 | 2337.843684 | 4114.255666  |
| OPN          | 18.22612654 | 17.43876928 | 0.000349786 | 0.006995716 | 1.725910031 | 20750    | P10923    | 326102.6503 | 293199.2285 | 301516.4272 | 167030.5784 | 174277.4106 | 192634.2446  |
| MCP-5        | 15.13911217 | 12.58568301 | 0.000458046 | 0.00832811  | 5.870279369 | 20293    | Q62401    | 26981.28354 | 45790.4834  | 38028.20094 | 5102.058697 | 7967.179881 | 5711.347396  |
| Galectin-1   | 16.03807118 | 14.50239329 | 0.000588884 | 0.00981473  | 2.89924628  | 16852    | P16045    | 73197.24735 | 56261.35525 | 73977.0536  | 18249.93933 | 24266.74558 | 28225.14129  |
| P-selectin   | 17.03343527 | 15.47066048 | 0.001593118 | 0.024509055 | 2.943170635 | 20344    | Q01102    | 161450.7853 | 120904.4105 | 123660.994  | 33974.34275 | 48951.78555 | 56928.48451  |
| bFGF         | 12.25039721 | 11.60810613 | 0.002093993 | 0.028661158 | 1.560805838 | 14173    | P15655    | 5092.285223 | 4628.021914 | 4904.957959 | 3323.598222 | 2937.802561 | 3112.54277   |
| IL-1ra       | 15.07466256 | 13.86458475 | 0.002149587 | 0.028661158 | 2.313501152 | 16181    | P25085    | 43221.59471 | 38087.7849  | 30858.67965 | 12818.43576 | 19634.97964 | 31182.96903  |
| Pro-MMP-9    | 19.85661045 | 18.64180594 | 0.002552267 | 0.031903339 | 2.32109329  | 17395    | P14245    | 998694.7988 | 1001334.348 | 855643.3779 | 324659.8039 | 618908.4489 | 340541.4923  |
| MIG          | 12.27638585 | 11.63120691 | 0.002751964 | 0.032376053 | 1.885002956 | 17329    | P18340    | 4376.954645 | 5175.253372 | 5386.587704 | 2345.541164 | 2957.104117 | 2621.717793  |
| IFN-gamma R1 | 10.29078311 | 11.44562796 | 0.002981902 | 0.03132248  | 0.48911448  | 15979    | P15261    | 1803.735117 | 938.8466914 | 1157.864598 | 2359.001815 | 2687.066533 | 3418.27668   |
| LIX          | 13.69874557 | 15.19163679 | 0.003498884 | 0.033653046 | 0.355299801 | 20311    | P50228    | 23653.08919 | 11546.41766 | 8605.148896 | 37198.36394 | 31760.04912 | 44358.30303  |
| TREM-1       | 12.00370104 | 10.85042937 | 0.003322976 | 0.033653046 | 2.23206051  | 58217    | Q9JKE2    | 4581.20347  | 3680.746049 | 4098.445033 | 1555.514294 | 1602.556425 | 2553.505758  |
| IL-20        | 12.18758582 | 10.90484988 | 0.004312658 | 0.039205986 | 2.432999364 | 58218    | Q9JKE9    | 7752.172753 | 3565.675013 | 3669.656288 | 1937.398135 | 1839.232043 | 1954.632128  |
| CD40         | 11.2842192  | 10.3953442  | 0.00464277  | 0.040558929 | 1.851731603 | 21939    | P27512    | 2097.28466  | 2311.294357 | 3196.111984 | 1132.465224 | 1226.110195 | 1755.46497   |
| CXCL16       | 13.95042722 | 12.69095245 | 0.004984525 | 0.040645746 | 2.394161149 | 66102    | Q8BSU2    | 15330.14629 | 13619.21747 | 18999.87295 | 6130.460121 | 5448.696506 | 8404.623374  |
| Grem1in      | 10.81819761 | 0.00580718  | 0.040645746 | 0.003857287 | 23892       | Q70326   | 0         | 0           | 0           | 0           | 263.4759521 | 327.418245  | 199.604527   |
| PIGF-2       | 11.12072726 | 8.604073032 | 0.002970709 | 0.070823148 | 5.722534386 | 18654    | P49764    | 4551.755736 | 3180.730732 | 761.2188108 | 250.2120827 | 344.8835861 | 677.0812342  |
| E-selectin   | 17.43501167 | 16.03014213 | 0.007565658 | 0.071543599 | 2.647946609 | 20339    | Q00690    | 274060.2969 | 115371.7833 | 175968.5185 | 5015.46359  | 74131.42046 | 80022.90335  |
| Progranulin  | 18.44651757 | 17.55906619 | 0.001601604 | 0.071543599 | 1.849905247 | 14824    | P12838    | 403262.1269 | 294112.7473 | 384379.6311 | 195234.7746 | 226531.0566 | 195234.7746  |
| IL-15        | 12.69003242 | 12.05111043 | 0.010698719 | 0.073784267 | 1.557165188 | 16168    | P48346    | 7458.216169 | 5545.909094 | 6973.2414   | 3447.122019 | 4684.989972 | 4748.919321  |
| TNF RI       | 16.81305207 | 16.53105207 | 0.011587623 | 0.077250823 | 1.175310206 | 21937    | P25118    | 123375.5106 | 121004.7194 | 102248.3094 | 85731.79991 | 81345.08506 | 84141.93555  |
| Prolactin    | 15.93881939 | 14.57115937 | 0.012345087 | 0.079645726 | 2.268376341 | 19109    | P06879    | 56984.31741 | 58192.1151  | 74739.09005 | 27596.58581 | 34719.45822 | 22159.84553  |
| Epregrulin   | 9.08893921  | 10.55211937 | 0.014359601 | 0.088998518 | 0.362591781 | 13874    | Q61521    | 1006.46717  | 459.3954532 | 347.1461883 | 856.3614851 | 1962.910045 | 1962.799641  |
| H60          | 8.240152693 | 8.924926437 | 0.014684756 | 0.088998518 | 0.622103383 | 15101    | Q3TDZ7    | 213.4567776 | 338.055651  | 379.1794389 | 535.0021738 | 458.434276  | 465.2539864  |
| Gas 6        | 14.63637379 | 13.79211789 | 0.01577818  | 0.090160675 | 1.795338515 | 14456    | Q61592    | 23541.45827 | 34118.5632  | 20562.98799 | 11301.02027 | 12619.8992  | 20010.38699  |
| TCK-1        | 16.66655996 | 17.17490387 | 0.015520236 | 0.090160675 | 7.02991713  | 57349    | Q9EQ15    | 114201.3665 | 110358.1371 | 89313.09859 | 151029.768  | 147808.2933 | 145851.9331  |
| BLC          | 14.19285851 | 12.40314782 | 0.017399004 | 0.094528026 | 3.45175991  | 55985    | Q55038    | 22423.8282  | 33963.23111 | 8624.658826 | 4928.253148 | 5266.9441   | 6118.780014  |
| IL-28        | 11.77823991 | 11.17315682 | 0.017487685 | 0.094528026 | 1.527066351 | 338374   | Q8CGK6    | 4275.082595 | 2958.819371 | 3422.727842 | 2062.52529  | 2212.865954 | 2683.373738  |
| TWEAK        | 10.47395644 | 11.66818609 | 0.018360601 | 0.09663474  | 0.437019736 | 21944    | Q54907    | 2172.14467  | 944.0376005 | 1399.836506 | 2518.46058  | 3221.99001  | 4243.993371  |
| Fas L        | 12.02543871 | 11.57946319 | 0.020007213 | 0.099548207 | 1.362234914 | 14103    | P14047    | 4107.253305 | 4267.204348 | 4130.911055 | 2693.32849  | 3131.082574 | 3392.833671  |
| Granzyme B   | 10.29881668 | 11.13961665 | 0.02001423  | 0.099548207 | 0.58333888  | 14939    | Q04187    | 1818.816921 | 993.9411128 | 1102.908668 | 1612.141866 | 2727.570413 | 2607.96664   |
| PF4          | 18.51653515 | 18.15513998 | 0.020905123 | 0.099548207 | 1.284667641 | 56744    | Q9Z126    | 3665.074555 | 379190.131  | 37944.69297 | 269925.1565 | 296016.959  | 280123.0581  |
| Testicain 3  | 8.147250732 | 9.381723921 | 0.020621008 | 0.099548207 | 0.42497662  | 72902    | Q8BKV0    | 330.2309075 | 332.6419484 | 205.2001866 | 797.2081045 | 378.2428616 | 979.6349904  |
| IL-13        | 12.06791924 | 11.48024556 | 0.023308713 | 0.108412617 | 1.028281524 | 16163    | P20109    | 4677.992042 | 4280.23671  | 3949.894949 | 2642.229161 | 2988.837202 | 27949.619709 |
| CD30         | 12.04018548 | 11.32046486 | 0.025113864 | 0.116161716 | 1.646863075 | 29140    | Q60846    | 5224.991519 | 3330.233643 | 4290.381747 | 2054.161441 | 2627.188329 | 3065.677951  |
| TROY         | 11.62921196 | 12.14226883 | 0.02394354  | 0.116161716 | 7.700727359 | 29820    | Q9JLL3    | 3628.403822 | 2876.108989 | 3042.920341 | 4545.40908  | 4265.07546  | 4972.699291  |
| ANG-3        | 9.567234611 | 10.36063226 | 0.028572395 | 0.121584659 | 0.576983654 | 11602    | Q9WVH6    | 1105.832481 | 540.6803703 | 791.6496494 | 1257.393086 | 1236.477674 | 1458.58555   |
| TGFB1        | 12.24937233 | 13.36145496 | 0.028275887 | 0.121584659 | 0.466262723 | 21803    | Q04202    | 7751.925668 | 3864.867757 | 3849.99454  | 7732.20422  | 9636.029978 | 15641.04275  |
| TRANCE       | 11.43139508 | 12.27659552 | 0.032939954 | 0.137249808 | 0.556263467 | 21943    | Q53235    | 3953.74359  | 2353.369415 | 2261.483903 | 3772.826667 | 4788.410106 | 6756.820192  |
| CTLA4        | 10.62289492 | 10.0323183  | 0.033862454 | 0.13821441  | 1.505848491 | 12477    | Q97975    | 1702.065278 | 1327.434875 | 1732.239699 | 786.65779   | 1227.682231 | 1185.612854  |
| Decorin      | 17.59508455 | 17.12328231 | 0.037868585 | 0.14889423  | 1.386840856 | 13179    | P20964    | 210571.7366 | 18007.6941  | 20706.41371 | 137344.4541 | 134006.2775 | 158095.4549  |
| HGF          | 12.40016537 | 13.3009855  | 0.0387125   | 0.14889423  | 0.535615595 | 15234    | Q80848    | 9247.20826  | 4040.967683 | 4223.883553 | 9058.435047 | 9678.756658 | 11719.33393  |
| TNF RI       | 16.8709175  | 16.51395386 | 0.03853506  | 0.14889423  | 1.280615962 | 19398    | P25119    | 139508.2408 | 110596.9725 | 111555.0077 | 91916.68682 | 97542.26327 | 91407.94018  |
| CD48         | 13.64069999 | 13.0803136  | 0.04029491  | 0.152056264 | 1.474429037 | 12506    | P18181    | 15079.81418 | 12321.58711 | 11204.85967 | 7845.635265 | 7798.885379 | 10614.29041  |
| Trypsase     | 0           | 5.117972809 | 0.041067819 | 0.152103035 | 0.028796299 | 70835    | Q9PER10   | 0           | 0           | 0           | 183.7355246 | 0           | 225.693747   |
| IL-4         | 11.81501077 | 12.27881824 | 0.042167266 | 0.153335513 | 0.725118775 | 21819    | Q07750    | 4509.223318 | 3580.322182 | 2895.435195 | 5183.125197 | 5080.936271 | 4656.717143  |
| Marapsin     | 7.599040749 | 8.386658558 | 0.047667229 | 0.169524032 | 0.579299832 | 161371   | Q8BIR6    | 158.6618262 | 303.4079543 | 148.9548393 | 298.0598803 | 406.4699048 | 306.6477614  |
| EGF          | 15.64884819 | 12.80496699 | 0.049965928 | 0.169646423 | 1.811799604 | 13645    | P01132    | 12047.8993  | 99486.52028 | 38172.57313 | 2153.       |             |              |

|             |             |             |             |             |             |        |        |             |             |             |             |              |             |
|-------------|-------------|-------------|-------------|-------------|-------------|--------|--------|-------------|-------------|-------------|-------------|--------------|-------------|
| GM-CSF      | 12.01301651 | 12.24696616 | 0.2063273   | 0.378582202 | 0.850303833 | 12983  | P26955 | 4288.345197 | 4687.81746  | 3509.593931 | 5399.772852 | 4635.678462  | 4585.164407 |
| MadCAM-1    | 10.68098274 | 10.23679564 | 0.205931336 | 0.378582202 | 1.360547286 | 17123  | Q61826 | 1921.033155 | 1010.245273 | 2275.518509 | 915.4428599 | 1328.279795  | 1441.201186 |
| Perioctin   | 17.00539786 | 17.52856933 | 0.209588844 | 0.381070626 | 0.695840491 | 50706  | Q62009 | 239987.6408 | 84787.48518 | 111911.0816 | 197162.5278 | 167810.2655  | 205049.7003 |
| Dkk-1       | 14.57039018 | 15.01221323 | 0.211436935 | 0.398985468 | 0.736479332 | 13380  | Q54908 | 40354.11568 | 18590.22042 | 19214.63093 | 28532.41043 | 26180.87013  | 42367.16734 |
| Renin I     | 15.47916744 | 14.97416737 | 0.24328735  | 0.434438813 | 1.419123417 | 19701  | P06281 | 62114.33932 | 30459.41567 | 50366.00423 | 31355.74629 | 22576.9161   | 47097.58762 |
| TARC        | 12.60875157 | 12.263173   | 0.26230654  | 0.464259364 | 1.270606462 | 20295  | Q9WU26 | 9232.165583 | 4821.974133 | 5471.32139  | 8862.7161   | 6343.469547  | 4844.606317 |
| DAN         | 9.437977416 | 9.901513238 | 0.27362401  | 0.479361256 | 0.72520671  | 74108  | Q8VDG3 | 1251.760225 | 418.6596674 | 633.7134684 | 1021.390985 | 832.5705322  | 1025.592523 |
| EDAR        | 3.443106208 | 6.481876702 | 0.280426335 | 0.479361256 | 0.121685528 | 13608  | Q9R187 | 0           | 1285.57391  | 0           | 55.6310393  | 44.77841204  | 274.4245767 |
| IL-5        | 12.57659149 | 12.77667597 | 0.278249795 | 0.479361256 | 0.870499587 | 16191  | P04401 | 6456.166542 | 7093.949332 | 4974.108539 | 7235.826457 | 7353.09956   | 6491.477813 |
| VEGF-B      | 8.415508045 | 7.940341516 | 0.276587699 | 0.479361256 | 1.390078666 | 22340  | P49766 | 364.5174744 | 291.5167347 | 371.3078472 | 185.5191321 | 235.2705934  | 335.2862894 |
| ANGPTL3     | 12.06635994 | 11.6893126  | 0.300991828 | 0.501964563 | 1.298681216 | 30924  | Q9R182 | 3692.974332 | 4236.843583 | 5038.298091 | 2217.955561 | 3540.430314  | 4582.253335 |
| OX40 Ligand | 9.425052423 | 8.670570319 | 0.301178738 | 0.501964563 | 1.687025879 | 22164  | P43488 | 378.2069317 | 2213.36223  | 385.8526157 | 329.0625531 | 325.3812405  | 627.0297838 |
| RAGE        | 9.507940867 | 10.12735774 | 0.299385638 | 0.501964563 | 0.650933976 | 26448  | Q9WV54 | 1639.365225 | 329.3337067 | 711.2504786 | 1299.321433 | 1072.605205  | 1001.351498 |
| MFG-E8      | 10.06414353 | 9.678801887 | 0.315098675 | 0.520824255 | 1.306169066 | 17304  | P21956 | 1618.867131 | 807.2824047 | 936.0974401 | 670.6469477 | 690.0731661  | 1185.216593 |
| MDC         | 14.56100333 | 14.16277097 | 0.321573389 | 0.522285268 | 1.317892197 | 20299  | Q88430 | 42618.60699 | 23597.79109 | 14039.97015 | 15321.67159 | 17621.71391  | 2284.06195  |
| RANTES      | 12.54299517 | 12.33372667 | 0.321688828 | 0.522285268 | 1.156101851 | 20304  | P30882 | 6094.68694  | 5882.706227 | 5925.246475 | 4262.917808 | 6608.006624  | 4880.126287 |
| VEGF R2     | 7.298348267 | 4.775195237 | 0.323816866 | 0.522285268 | 5.748370417 | 16542  | P35918 | 129.5323266 | 89.66115676 | 328.551186  | 139.7534368 | 0            | 144.8720198 |
| IL-6        | 13.7403206  | 13.8768147  | 0.341843271 | 0.542608366 | 0.908570636 | 16193  | P08505 | 14541.45593 | 14555.87125 | 12106.89268 | 14132.76416 | 16097.23317  | 15018.7331  |
| Persephin   | 7.722824441 | 7.36022367  | 0.341448486 | 0.542608366 | 1.285741637 | 19197  | Q70300 | 215.7671003 | 198.1983465 | 217.3364911 | 140.3989449 | 124.170591   | 249.609622  |
| Leptin R    | 13.00095469 | 13.26249881 | 0.350178209 | 0.551461746 | 0.834194599 | 16847  | P48356 | 9631.692719 | 5846.003949 | 9779.271436 | 9308.240727 | 10099.08099  | 10091.31422 |
| SDF-1a      | 12.09077669 | 12.32349579 | 0.361583288 | 0.564973887 | 0.851029416 | 20315  | P40224 | 5921.542154 | 4260.606796 | 3287.348414 | 4865.444274 | 4537.154912  | 6096.258609 |
| Gas 1       | 14.97411804 | 15.21081123 | 0.371617699 | 0.576150077 | 0.848687739 | 14451  | Q01721 | 431.1834397 | 2426.24456  | 31653.06141 | 34103.48903 | 45609.37468  | 5740.47068  |
| MIP-3b      | 7.894151841 | 7.226943205 | 0.376051681 | 0.578541047 | 1.587997944 | 24047  | Q70460 | 124.3149123 | 284.484842  | 375.3084019 | 217.6832658 | 47.68585869  | 314.7635055 |
| VEGF-D      | 9.490618512 | 10.01064625 | 0.381065335 | 0.581779137 | 1.097538427 | 14205  | P97946 | 739.8849967 | 367.739329  | 1361.737753 | 845.9221739 | 1342.620266  | 964.3073984 |
| Clusterin   | 13.26049537 | 13.05630549 | 0.387356041 | 0.582490288 | 1.152039263 | 12759  | Q06890 | 12509.07859 | 8148.464538 | 9267.970102 | 7765.123371 | 8552.548395  | 9302.966738 |
| Limitin     | 11.35500843 | 11.51512486 | 0.384706071 | 0.582490288 | 0.894952844 | 15964  | Q61716 | 2898.165867 | 2309.966745 | 2681.425435 | 2071.428923 | 2575.2018028 | 3219.008208 |
| IL-12p70    | 11.07807861 | 10.92867016 | 0.390434712 | 0.582738375 | 1.109114651 | 16159  | P43431 | 2327.990897 | 2016.196408 | 2149.729999 | 1903.864999 | 1629.831033  | 2382.956866 |
| Csa         | 17.04978017 | 16.92181578 | 0.41783272  | 0.608597674 | 1.07257077  | 15139  | P06684 | 157890.3132 | 116902.0502 | 135300.2088 | 13028.08404 | 127846.0872  | 114899.6422 |
| Chordin     | 12.6526329  | 12.91331574 | 0.417660141 | 0.608597674 | 0.834692756 | 12667  | Q920E2 | 8178.594771 | 4776.344201 | 6830.998344 | 6877.782459 | 7023.088626  | 9500.334067 |
| Fetuin A    | 13.68341725 | 13.44972395 | 0.419932395 | 0.608597674 | 1.175836848 | 11625  | P29699 | 1188.577133 | 1146.290722 | 16693.1901  | 8880.296039 | 12627.6403   | 12486.71143 |
| TECK        | 2.351549634 | 4.964029838 | 0.41843915  | 0.608597674 | 0.163517823 | 20300  | Q35903 | 0           | 0           | 131.9416082 | 130.3158782 | 0            | 20.5591927  |
| IFNγ        | 12.70050667 | 12.8189711  | 0.421767004 | 0.615361157 | 0.921214841 | 15978  | P01580 | 6973.974337 | 7258.898156 | 5823.079091 | 6894.372307 | 7943.515645  | 6885.403779 |
| MIP-2       | 8.356279117 | 8.871458809 | 0.443190401 | 0.633129144 | 0.699705777 | 20310  | P10889 | 452.7948449 | 144.9152652 | 530.5103329 | 810.7787044 | 238.6290441  | 527.1393314 |
| Dkk         | 8.212569817 | 8.569529685 | 0.450481632 | 0.638981038 | 0.780774117 | 22174  | P55144 | 450.2346096 | 377.9101278 | 151.6690324 | 329.9139975 | 359.1575046  | 486.2122821 |
| CD27        | 12.8026904  | 12.94918439 | 0.464389648 | 0.654069927 | 1.039344333 | 21940  | P41272 | 7782.885202 | 6074.457415 | 7711.694068 | 6997.669726 | 7108.067162  | 9940.47087  |
| gp130       | 10.22777441 | 9.54045906  | 0.475296708 | 0.661055013 | 1.610250472 | 16195  | Q00560 | 3247.065858 | 432.7330566 | 1186.290079 | 591.0759503 | 547.1348357  | 1271.414144 |
| Osteonectin | 12.28697869 | 11.59329505 | 0.475959609 | 0.661055013 | 1.617414715 | 93695  | Q99991 | 12201.73979 | 1985.264894 | 5418.355902 | 1989.058002 | 3099.848626  | 4776.94215  |
| HAI-1       | 12.67825662 | 12.82382951 | 0.484517556 | 0.668300078 | 0.904020323 | 20732  | Q9R097 | 7420.068935 | 5271.022648 | 7196.188416 | 6642.728689 | 7700.050529  | 8141.84228  |
| E-Cadherin  | 16.31810903 | 16.41610851 | 0.493374846 | 0.675855953 | 0.934327668 | 12550  | P09803 | 89319.61698 | 10100.06693 | 81304.81148 | 86208.9954  | 8744.381135  | 88441.12469 |
| IGF-1       | 17.96588892 | 18.07624281 | 0.499867329 | 0.680091604 | 0.928095641 | 16000  | P05017 | 304222.3674 | 218643.9382 | 253698.779  | 269791.793  | 262658.3753  | 293538.043  |
| Flt-3L      | 15.70655419 | 15.86315844 | 0.518724637 | 0.684551708 | 0.912706587 | 14256  | P49772 | 56383.14301 | 53523.52082 | 50664.33991 | 54633.02506 | 62790.64839  | 61728.74302 |
| Galectin-7  | 10.27421785 | 10.51496518 | 0.523663834 | 0.684551708 | 0.846365467 | 16858  | Q50974 | 2048.327923 | 937.430989  | 986.482347  | 1224.814117 | 1911.181454  | 1335.33622  |
| HGF R       | 12.47910495 | 12.52959093 | 0.5192651   | 0.684551708 | 1.137726681 | 17295  | P16056 | 6569.880335 | 4311.157376 | 6567.051745 | 3674.676016 | 5794.942324  | 5930.706602 |
| IL-3        | 12.2454184  | 12.38194441 | 0.523682057 | 0.684551708 | 0.909707099 | 16187  | P01586 | 4790.191555 | 6189.293829 | 3853.153404 | 5675.681445 | 4723.989691  | 5668.106911 |
| MBL-2       | 18.66562786 | 18.57359932 | 0.51121868  | 0.684551708 | 1.065867824 | 17195  | P41137 | 428994.6978 | 381729.0725 | 439088.0028 | 357448.4128 | 39804.3349   | 416986.327  |
| P-Cadherin  | 12.34386747 | 11.80116355 | 0.518186703 | 0.684551708 | 1.45670013  | 12560  | P10287 | 11923.74674 | 4073.029224 | 2890.677194 | 2170.886474 | 5153.494837  | 4058.657611 |
| IGFBP-6     | 18.0952016  | 17.8344774  | 0.53074171  | 0.689274949 | 1.198701486 | 16012  | P47880 | 143536.4583 | 360741.7469 | 424698.203  | 217011.013  | 242588.311   | 242523.567  |
| Adiponectin | 15.61749298 | 15.69711264 | 0.53847903  | 0.690357731 | 0.946307099 | 11450  | Q60994 | 52695.21531 | 49210.52589 | 48994.39615 | 60438.64264 | 48878.40943  | 50846.15984 |
| I-TAC       | 5.561577543 | 7.357241993 | 0.53684244  | 0.690357731 | 0.288038897 | 50606  | Q9JH85 | 181.7088611 | 0           | 575.561569  | 80.55030455 | 295.2166921  | 181.4804996 |
| CRP         | 15.91587241 | 15.98937475 | 0.557599196 | 0.710317447 | 0.965328144 | 12944  | P14847 | 66631.7753  | 57206.29549 | 61989.57861 | 67232.39204 | 60754.79058  | 67040.89636 |
| BT-1        | 12.02861912 | 11.75241501 | 0.566651202 | 0.717280002 | 1.211004399 | 12519  | Q00609 | 5160.344997 | 3673.858886 | 3844.226493 | 1583.060332 | 4531.472654  | 5718.807444 |
| IL-7        | 10.90010408 | 10.73956038 | 0.588247867 | 0.738580928 | 1.117780281 | 16196  | P10168 | 1655.060181 | 2517.034722 | 1672.543565 | 1493.445207 | 2162.831874  | 1544.560042 |
| JAM-A       | 15.44410759 | 15.25897407 | 0.590864743 | 0.738580928 | 1.134523758 | 16486  | Q05872 | 67063.37354 | 32839.22379 | 39968.65423 | 31981.45188 | 43002.0622   | 43829.50445 |
| BAFF R      | 11.35441439 | 11.26954108 | 0.631692603 | 0.74756521  | 1.065496044 | 72049  | Q9PD80 | 3047.208135 | 2291.199243 | 2291.199243 | 2049.061644 | 2659.378852  | 2659.378852 |
| BTC         | 12.69475421 | 12.82741435 | 0.621556003 | 0.74756521  | 0.912148018 | 12223  | Q05928 | 8446.946186 | 5528.232481 | 6237.632851 | 5921.771201 | 6826.213673  | 9481.118207 |
| GITR        | 9.351440607 | 9.17311189  | 0.625600747 | 0.74756521  | 1.128283346 | 21936  | Q35714 | 566.952142  | 533.3567749 | 925.5277594 | 675.7990407 | 425.0746674  | 617.9648711 |
| IL-17E      | 9.181117748 | 9.304328386 | 0.630143613 | 0.74756521  | 0.918142101 | 140806 | Q8VH88 | 575.1615755 | 475.1701723 | 711.9618885 | 535.8010673 | 631.272583   | 743.6086557 |
| IL-17F      | 9.408679079 | 9.39387335  | 0.611190872 | 0.74756521  | 0.877391932 | 257630 | Q7TN17 | 423.7411246 | 807.5075472 | 913.2721196 | 608.3753462 | 651.587121   | 1167.960303 |
| KC          | 14.31959702 | 14.18190467 | 0.63043278  | 0.74756521  | 1.100143981 | 14825  | P12850 | 29658.22778 | 18134.66022 | 15891.47272 | 19273.17552 | 17982.96873  | 18520.44024 |
| Lymphoactin | 11.70873014 | 11.82366011 | 0.626008572 | 0.74756521  | 0.923426556 | 16963  | P47993 | 3826.029565 | 1789.89     |             |             |              |             |
