# Supplementary material for: LCN2 secreted by tissue-infiltrating neutrophils induces the ferroptosis and wasting of adipose and muscle tissues in lung cancer cachexia
Source: Springer Nature journal article supplement (doi:10.1186/s13045-023-01429-1), 2023-03-27
Supplement: MOESM4 [file 24738850]

**Table S5 Clinical characteristics of patients in this study**

| Case NO | Age | Gender | Height (m) | Body weight (kg) | BMI (kg/m <sup>2</sup> ) | ALB (g/L) | HGB (g/L) | CRP (mg/mL) | IL-6 (pg/mL) | Tumor type | LCN2 (ng/mL) | Cancer stage | Main tumor site                                       | Cachexia (Yes or No) |
|---------|-----|--------|------------|------------------|--------------------------|-----------|-----------|-------------|--------------|------------|--------------|--------------|-------------------------------------------------------|----------------------|
| 1       | 67  | M      | 1.78       | 61               | 19.25                    | 40.6      | 146       | 32.02       | 18.79        | LUAD       | 97.23        | IV           | lung,bone,liver,adrenal gland                         | Yes                  |
| 2       | 70  | M      | 1.68       | 42               | 14.88                    | 37        | 123       | 83.42       | 224.59       | ESCA       | 145.75       | IV           | esophagus                                             | Yes                  |
| 3       | 49  | M      | 1.78       | 70               | 22.09                    | 37.4      | 88        | 23.85       | 18.49        | SCLC       | 121.41       | IV           | lung,liver,lymph gland                                | Yes                  |
| 4       | 69  | M      | 1.68       | 61               | 21.61                    | 28.2      | 112       | 75.9        | 18.36        | STAD       | 126.87       | IV           | stomach,liver,lymph gland                             | Yes                  |
| 5       | 82  | M      | 1.65       | 44.5             | 16.34                    | 40.6      | 108       | 4.72        | 18.14        | COAD       | 118.70       | IV           | colon,abdominal cavity                                | Yes                  |
| 6       | 55  | M      | 1.65       | 47               | 17.26                    | 34.1      | 73        | 107.93      | 276.23       | STAD       | 141.85       | IV           | stomach,liver,lymph gland                             | Yes                  |
| 7       | 43  | M      | 1.73       | 45               | 15.03                    | 32.6      | 53        | 15.89       | 17.02        | ESCA       | 85.13        | IV           | esophagus                                             | Yes                  |
| 8       | 42  | F      | 1.65       | 45               | 16.53                    | 32.2      | 86        | 77.31       | 18.17        | BRCA       | 74.89        | IV           | breast,liver,lung,bone,lymph gland                    | Yes                  |
| 9       | 53  | M      | 1.7        | 65               | 22.49                    | 33.2      | 83        | 28.34       | 17.04        | COAD       | 86.70        | IV           | rectum,pelvic cavity,mesentery,peritoneum,lymph gland | Yes                  |
| 10      | 56  | M      | 1.7        | 41               | 14.19                    | 29.1      | 78        | 66.54       | 18.59        | STAD       | 198.21       | IV           | stomach,abdominal cavity,pelvic cavity                | Yes                  |
| 11      | 49  | M      | 1.7        | 40               | 13.84                    | 34.2      | 91        | 69.53       | 545.54       | ESCA       | 76.12        | IV           | esophagus,lymph gland                                 | Yes                  |
| 12      | 64  | M      | 1.7        | 49               | 16.95                    | 36        | 97        | 25.78       | 19.63        | SCLC       | 206.81       | Extensive    | lung,bone                                             | Yes                  |
| 13      | 54  | M      | 1.69       | 62.5             | 21.88                    | 30.4      | 115       | 11.56       | 16.98        | CHOL       | 138.68       | IV           | bile duct,bone,lung,abdominal cavity, peritoneum      | Yes                  |
| 14      | 52  | F      | 1.61       | 57               | 21.99                    | 39.9      | 100       | 21.45       | 18.87        | READ       | 71.53        | pT3N2aM1,IV  | rectum,liver                                          | Yes                  |
| 15      | 51  | F      | 1.56       | 50               | 20.54                    | 46.3      | 80        | 121.78      | 16.53        | READ       | 1139.10      | IV           | colon,abdominal cavity,pelvic cavity                  | Yes                  |
| 16      | 47  | F      | 1.6        | 40               | 15.62                    | 32.8      | 72        | 11.80       | 16.50        | OV         | 113.99       | IIIC         | ovary,liver,abdominal cavity, peritoneum              | Yes                  |
| 17      | 58  | F      | 1.5        | 41.5             | 18.44                    | 29.2      | 90        | 66.84       | 20.77        | CESC       | 182.10       | IV           | cervix,abdominal cavity,pelvic cavity                 | Yes                  |
| 18      | 68  | M      | 1.61       | 46               | 17.75                    | 30.5      | 99        | 42.97       | 17.08        | PAAD       | 173.46       | IV           | pancreas,abdominal cavity, peritoneum                 | Yes                  |
| 19      | 53  | M      | 1.72       | 50               | 16.90                    | 41.1      | 92        | 34.10       | 13.55        | ESCA       | 130.24       | pT2N1M0,IIB  | esophagus                                             | Yes                  |
| 20      | 56  | F      | 1.63       | 55               | 20.70                    | 38.8      | 101       | 1.98        | 7.66         | OV         | 32.196       | III          | ovary,peritoneum, abdominal cavity                    | Yes                  |
| 21      | 74  | F      | 1.74       | 50               | 16.51                    | 29.9      | 91        | 51.6        | 13.01        | STAD       | 99.93        | IV           | stomach,abdominal cavity                              | Yes                  |
| 22      | 58  | M      | 1.6        | 45               | 17.58                    | 44.9      | 114       | 0.18        | 14.85        | ESCA       | 16.57        | IV           | esophagus.lung,brain,lymph gland                      | Yes                  |
| 23      | 53  | M      | 1.72       | 60               | 20.28                    | 38        | 126       | 0.97        | 9.74         | READ       | 57.03        | T3N1cM1,IV   | rectum,liver                                          | Yes                  |
| 24      | 69  | F      | 1.65       | 45               | 16.53                    | 38.8      | 113       | 0.5         | 9.80         | STAD       | 87.99        | IV           | stomach,abdominal cavity                              | Yes                  |
| 25      | 54  | M      | 1.6        | 50.5             | 19.73                    | 45.2      | 109       | 19.7        | 9.74         | COAD       | 70.05        | IV           | colon,adrenal gland,pelvic cavity,abdominal cavity    | Yes                  |
| 26      | 68  | F      | 1.5        | 44               | 19.55                    | 33.2      | 115       | 60.78       | 9.32         | LUAD       | 142.02       | IV           | lung,bone,liver,brain,peritoneum,abdominal cavity     | Yes                  |
| 27      | 57  | F      | 1.62       | 38               | 14.48                    | 30.2      | 83        | 16.99       | 13.34        | STAD       | 62.23        | IV           | stomach,abdominal cavity,pelvic cavity                | Yes                  |
| 28      | 52  | M      | 1.65       | 62               | 22.77                    | 37.5      | 106       | 49.58       | 11.76        | ESCA       | 80.69        | T3N2M0G2,IV  | esophagus,lymph gland                                 | Yes                  |
| 29      | 70  | M      | 1.73       | 54               | 18.04                    | 35        | 128       | 6.51        | 11.31        | ESCA       | 48.09        | IV           | esophagus,lymph gland, lung                           | Yes                  |
| 30      | 64  | F      | 1.55       | 65               | 27.05                    | 38.7      | 83        | 1.78        | 9.07         | STAD       | 234.80       | IV           | stomach,abdominal cavity                              | Yes                  |
| 31      | 66  | M      | 1.78       | 58               | 18.31                    | 25.1      | 76        | 18.67305388 | 14.41828909  | LUSC       | 332.91       | IV           | lung                                                  | Yes                  |
| 32      | 63  | M      | 1.7        | 57.5             | 19.90                    | 41        | 110       | 6.559848015 | 2.530500107  | SCLC       | 135.06       | IV           | lung,stomach                                          | Yes                  |
| 33      | 76  | M      | 1.62       | 52               | 19.81                    | 35.1      | 109       | 25.87247587 | 1.947404     | LUSC       | 196.58       | IV           | liver,lung,bone                                       | Yes                  |

**Table S5 Clinical characteristics of patients in this study (Continue)**

| Case NO | Age | Gender | Height (m) | Body weight (kg) | BMI (kg/m <sup>2</sup> ) | ALB (g/L) | HGB (g/L) | CRP (mg/mL) | IL-6 (pg/mL) | Tumor type | LCN2 (ng/mL) | Cancer stage | Main tumor site        | Cachexia (Yes or No) |
|---------|-----|--------|------------|------------------|--------------------------|-----------|-----------|-------------|--------------|------------|--------------|--------------|------------------------|----------------------|
| 1       | 60  | M      | 1.75       | 76               | 24.82                    | 44.2      | 144       | 2.46        | 13.20        | SCLC       | 66.10        | ED           | lung, liver            | No                   |
| 2       | 58  | M      | 1.7        | 54               | 18.69                    | 41.7      | 125       | 3.07        | 13.94        | LUAD       | 72.45        | cT1N1M1,IVB  | lung,brain             | No                   |
| 3       | 75  | F      | 1.58       | 40               | 16.02                    | 43.1      | 126       | 5.00        | 11.80        | LUAD       | 69.42        | cT4N2M1C,IVB | lung,bone,brain        | No                   |
| 4       | 56  | M      | 1.7        | 64               | 22.15                    | 36.3      | 108       | 7.22        | 12.24        | SCLC       | 70.02        | ED           | lung,bone              | No                   |
| 5       | 72  | M      | 1.61       | 62               | 23.92                    | 46.2      | 140       | 14.07       | 11.88        | LUSC       | 51.98        | cT3N3M0,IIIC | lung,mediastinum       | No                   |
| 6       | 66  | M      | 1.7        | 60               | 20.76                    | 34.2      | 85        | 1.91        | 13.90        | LUSC       | 190.49       | T1N2M1,IV    | lung                   | No                   |
| 7       | 56  | M      | 1.56       | 60               | 24.65                    | 37.7      | 114       | 1.33        | 15.34        | SCLC       | 68.81        | ED           | lung                   | No                   |
| 8       | 60  | M      | 1.7        | 59               | 20.42                    | 36.1      | 71        | 11.40       | 14.17        | LUAD       | 106.03       | cT4N2M0,IIIb | lung                   | No                   |
| 9       | 54  | F      | 1.52       | 43               | 18.61                    | 41.7      | 97        | 1.56        | 14.07        | LUSC       | 74.89        | cT2N1M1a,IVa | lung,bone              | No                   |
| 10      | 64  | M      | 1.68       | 63               | 22.32                    | 34.8      | 103       | 37.51       | 11.12        | LUSC       | 62.52        | cT3N3M1a,IVa | lung,adrenal gland     | No                   |
| 11      | 76  | F      | 1.6        | 69               | 26.95                    | 43.7      | 146       | 0.28        | 11.98        | LUAD       | 66.70        | T1N2M1C,IVB  | lung,bone,brain        | No                   |
| 12      | 65  | M      | 1.79       | 64               | 19.97                    | 38.1      | 116       | 2.61        | 13.73        | LUAD       | 59.57        | cT4N2M1,IVa  | lung                   | No                   |
| 13      | 81  | M      | 1.7        | 55               | 19.03                    | 34.7      | 135       | 36.95       | 11.05        | LUSC       | 137.63       | IV           | lung                   | No                   |
| 14      | 74  | M      | 1.73       | 64               | 21.38                    | 38.4      | 122       | 0.13        | 14.25        | LUAD       | 114.67       | IV           | lung,bone              | No                   |
| 15      | 69  | M      | 1.67       | 67               | 24.02                    | 39.2      | 126       | 10.51       | 13.50        | LUAD       | 84.19        | cT1N1M1a,IVA | lung,pleura,peritoneum | No                   |
| 16      | 67  | F      | 1.52       | 75               | 32.46                    | 47.9      | 109       | 2.06        | 12.43        | LUSC       | 67.30        | T4N3M1,IV    | lung                   | No                   |
| 17      | 48  | F      | 1.53       | 66               | 28.19                    | 41.5      | 110       | 2.08        | 11.55        | LUAD       | 70.63        | T3N1M1b,IV   | lung,bone              | No                   |
| 18      | 49  | M      | 1.62       | 74               | 28.20                    | 42        | 44.6      | 38.67       | 11.13        | SCLC       | 77.66        | ED           | lung,bone              | No                   |
| 19      | 64  | M      | 1.7        | 50               | 17.30                    | 39        | 99        | 2.53        | 11.25        | SCLC       | 198.60       | ED           | lung                   | No                   |
| 20      | 70  | M      | 1.61       | 61               | 23.53                    | 37.8      | 145       | 1.44        | 13.52        | LCNEC      | 85.13        | pT2bN0M0     | lung                   | No                   |
| 21      | 68  | M      | 1.78       | 79               | 24.93                    | 36.6      | 128       | 0.30        | 11.59        | LUSC       | 97.56        | IV           | lung                   | No                   |
| 22      | 67  | F      | 1.62       | 68               | 25.91                    | 44.8      | 130       | 1.69        | 13.39        | LUAD       | 69.11        | pT2bN0M0,IIa | lung                   | No                   |
| 23      | 75  | M      | 1.77       | 65               | 20.75                    | 37.2      | 120       | 4.75        | 13.63        | LUSC       | 107.68       | T3N2M1,IV    | lung,bone,liver        | No                   |
| 24      | 45  | M      | 1.71       | 65               | 22.23                    | 41.3      | 132       | 1.66        | 11.35        | LUAD       | 120.06       | T4N2M1a,IV   | lung                   | No                   |
| 25      | 74  | M      | 1.7        | 60.6             | 20.97                    | 40.6      | 104       | 18.49       | 11.06        | LUSC       | 64.91        | cT4N3M1,IVB  | lung                   | No                   |
| 26      | 77  | F      | 1.55       | 55               | 22.89                    | 31.6      | 91        | 22.20       | 11.50        | LUAD       | 138.68       | cT1N3M1a,IVA | lung,brain             | No                   |
| 27      | 63  | M      | 1.78       | 92               | 29.04                    | 37.7      | 124       | 14.36       | 11.00        | LUAD       | 70.02        | IV           | lung,brain             | No                   |
| 28      | 77  | M      | 1.78       | 65               | 20.52                    | 39.4      | 137       | 6.33        | 11.02        | LUAD       | 76.12        | T4N2M1,IV    | lung                   | No                   |
| 29      | 70  | M      | 1.83       | 69               | 20.60                    | 38.5      | 106       | 14.18       | 11.82        | LUAD       | 79.83        | cT4N3M1,IVB  | lung,peritoneum        | No                   |
| 30      | 63  | F      | 1.59       | 69               | 27.29                    | 45.9      | 107       | 1.13        | 15.06        | LUAD       | 67.30        | T1bN2M0,IIIA | lung                   | No                   |
| 31      | 79  | F      | 1.55       | 58               | 24.14                    | 38.7      | 135       | 0.39        | 3.68         | LUAD       | 58.90        | CT1N3M1,IV   | lung,brain             | No                   |
| 32      | 66  | F      | 1.48       | 48               | 21.91                    | 39.9      | 123       | 12.87       | 3.07         | LUAD       | 50.00        | IV           | lung                   | No                   |
| 33      | 81  | M      | 1.73       | 65               | 21.72                    | 40.5      | 98        | 3.61        | 2.87         | LUAD       | 51.49        | IV           | lung                   | No                   |
| 34      | 71  | M      | 1.6        | 52               | 20.31                    | 36.9      | 106       | 10.97       | 3.33         | LUSC       | 55.45        | T3N3Mx       | lung                   | No                   |
