# Supplementary material for: LCN2 secreted by tissue-infiltrating neutrophils induces the ferroptosis and wasting of adipose and muscle tissues in lung cancer cachexia
Source: Springer Nature journal article supplement (doi:10.1186/s13045-023-01429-1), 2023-03-27
Supplement: MOESM6 [file 24738850]

**Table S7. Gene lists of KEGG**

| KEGGID   | KEGG description                | Genes                                                                                                                                                                                         |  |  |  |  |  |  |  |
|----------|---------------------------------|-----------------------------------------------------------------------------------------------------------------------------------------------------------------------------------------------|--|--|--|--|--|--|--|
| mmu04975 | Ferroptosis                     | Map1lc3b/Steap3/Slc39a8/Slc3a2/Pcbp2/Vdac3/Sat1/Tfrc/Acs13/Map1lc3a/Alox15/Slc39a14/Acs11/Ncoa4/Atg7/Gpx4                                                                                     |  |  |  |  |  |  |  |
| mmu04216 | Fat digestion and absorption    | Dgat2/Agpat2/Scarb1/Mogat2/Apoa1/Slc27a4/Plpp3/Acat2/Plpp1/Pla2g2e/Apob/Fabp1/Mttp/Pla2g2c                                                                                                    |  |  |  |  |  |  |  |
| mmu04979 | Cholesterol metabolism          | Ldlr/Angptl8/Apoc3/Npc1/Scarb1/Soat2/Myliip/Apoa1/Angptl4/Vdac3/Lipg/Lrp1/Apob/Apoe/Lpl/Lrpap                                                                                                 |  |  |  |  |  |  |  |
| mmu04668 | TNF signaling pathway           | Pik3r1/Nfkbia/Edn1/Sele/Lif/Ccl2/Creb3l1/Icam1/Pik3r3/Socs3/Traf3/Tab3/Irf1/Csf1/Mapk11/Gm5431/Map2k6/I16/Mmp9/Cxcl2/Junb/Ccl5/Casp3/Mapk12/I11b/Mkl1/Ripk3/Cebpb/I118r1/Casp                 |  |  |  |  |  |  |  |
| mmu00071 | Fatty acid degradation          | Acox1/Eci2/Acat2/Acaa2/Cyp4a32/Adh5/Eci1/Acs13/Cyp4a10/Acads/Aldh7a1/Acs11/Cpt2/Acad                                                                                                          |  |  |  |  |  |  |  |
| mmu04920 | Adipocytokine signaling pathway | Prkag3/Nfkbia/Adipor2/Acacb/Pck1/Stk11/Stat3/Socs3/Lepr/Rxb1/Irs2/Pek2/Camkk2/Acs13/Adipor1/Prkag1/Rxrg/Lep/Prkcq/Acs1                                                                        |  |  |  |  |  |  |  |
| mmu04630 | JAK-STAT signaling pathway      | I14ra/Pik3r1/Csf2rb2/Csf2rb/I117d/Jak3/Csf3r/Lif/Egfr/I16st/I122ra2/Stat3/Pik3r3/I12rb/Socs3/Pdgfra/Lepr/I16ra/Ifngr1/Pim1/Thpo/Ifngr2/I111ra1/Pdgfb/I16/Pdgfra/Egf/Ccnd1/Lep/Osmr/Tslp/Lifr/ |  |  |  |  |  |  |  |
