# Supplementary material for: LCN2 secreted by tissue-infiltrating neutrophils induces the ferroptosis and wasting of adipose and muscle tissues in lung cancer cachexia
Source: J Hematol Oncol. 2023 Mar 27;16:30. doi: 10.1186/s13045-023-01429-1 (PMC10044814; doi:10.1186/s13045-023-01429-1)
Supplement: Supplementary file 5 — Additional file 5. Table S6: Differential expressed genes in eWAT. [file 13045_2023_1429_MOESM5_ESM.pdf]

[illegible]



[illegible]



[illegible]

[illegible]

[illegible]



[illegible]

[illegible]







|                |            |            |            |           |            |            |           |            |           |           |           |           |           |      |                |                                                                                         |
|----------------|------------|------------|------------|-----------|------------|------------|-----------|------------|-----------|-----------|-----------|-----------|-----------|------|----------------|-----------------------------------------------------------------------------------------|
| ENSRG000000001 | 2247.72354 | 2257.50000 | 1344.09525 | 154.50125 | 2281.43344 | 2297.54750 | 229.78000 | 1729.10000 | 4.7647500 | 0.0337500 | 22.67500  | 11.11000  | 117.93000 | 9166 | protein coding | long finger CXXC type domain 1 (Foscof-Medl Synchro-Acc-Medl 2443040)                   |
| ENSRG000000002 | 352.46900  | 352.46900  | 352.46900  | 352.46900 | 352.46900  | 352.46900  | 352.46900 | 352.46900  | 352.46900 | 352.46900 | 352.46900 | 352.46900 | 352.46900 | 9167 | protein coding | soluble cytochrome b5 (transmembrane) member 1 (Foscof-Medl Synchro-Acc-Medl 18932976)  |
| ENSRG000000003 | 115.81704  | 207.96250  | 186.16200  | 38.70810  | 38.70810   | 38.70810   | 38.70810  | 38.70810   | 38.70810  | 38.70810  | 38.70810  | 38.70810  | 38.70810  | 9168 | protein coding | soluble cytochrome b5 (transmembrane) member 2 (Foscof-Medl Synchro-Acc-Medl 18932976)  |
| ENSRG000000004 | 115.81704  | 207.96250  | 186.16200  | 38.70810  | 38.70810   | 38.70810   | 38.70810  | 38.70810   | 38.70810  | 38.70810  | 38.70810  | 38.70810  | 38.70810  | 9169 | protein coding | soluble cytochrome b5 (transmembrane) member 3 (Foscof-Medl Synchro-Acc-Medl 18932976)  |
| ENSRG000000005 | 115.81704  | 207.96250  | 186.16200  | 38.70810  | 38.70810   | 38.70810   | 38.70810  | 38.70810   | 38.70810  | 38.70810  | 38.70810  | 38.70810  | 38.70810  | 9170 | protein coding | soluble cytochrome b5 (transmembrane) member 4 (Foscof-Medl Synchro-Acc-Medl 18932976)  |
| ENSRG000000006 | 115.81704  | 207.96250  | 186.16200  | 38.70810  | 38.70810   | 38.70810   | 38.70810  | 38.70810   | 38.70810  | 38.70810  | 38.70810  | 38.70810  | 38.70810  | 9171 | protein coding | soluble cytochrome b5 (transmembrane) member 5 (Foscof-Medl Synchro-Acc-Medl 18932976)  |
| ENSRG000000007 | 115.81704  | 207.96250  | 186.16200  | 38.70810  | 38.70810   | 38.70810   | 38.70810  | 38.70810   | 38.70810  | 38.70810  | 38.70810  | 38.70810  | 38.70810  | 9172 | protein coding | soluble cytochrome b5 (transmembrane) member 6 (Foscof-Medl Synchro-Acc-Medl 18932976)  |
| ENSRG000000008 | 115.81704  | 207.96250  | 186.16200  | 38.70810  | 38.70810   | 38.70810   | 38.70810  | 38.70810   | 38.70810  | 38.70810  | 38.70810  | 38.70810  | 38.70810  | 9173 | protein coding | soluble cytochrome b5 (transmembrane) member 7 (Foscof-Medl Synchro-Acc-Medl 18932976)  |
| ENSRG000000009 | 115.81704  | 207.96250  | 186.16200  | 38.70810  | 38.70810   | 38.70810   | 38.70810  | 38.70810   | 38.70810  | 38.70810  | 38.70810  | 38.70810  | 38.70810  | 9174 | protein coding | soluble cytochrome b5 (transmembrane) member 8 (Foscof-Medl Synchro-Acc-Medl 18932976)  |
| ENSRG000000010 | 115.81704  | 207.96250  | 186.16200  | 38.70810  | 38.70810   | 38.70810   | 38.70810  | 38.70810   | 38.70810  | 38.70810  | 38.70810  | 38.70810  | 38.70810  | 9175 | protein coding | soluble cytochrome b5 (transmembrane) member 9 (Foscof-Medl Synchro-Acc-Medl 18932976)  |
| ENSRG000000011 | 115.81704  | 207.96250  | 186.16200  | 38.70810  | 38.70810   | 38.70810   | 38.70810  | 38.70810   | 38.70810  | 38.70810  | 38.70810  | 38.70810  | 38.70810  | 9176 | protein coding | soluble cytochrome b5 (transmembrane) member 10 (Foscof-Medl Synchro-Acc-Medl 18932976) |
| ENSRG000000012 | 115.81704  | 207.96250  | 186.16200  | 38.70810  | 38.70810   | 38.70810   | 38.70810  | 38.70810   | 38.70810  | 38.70810  | 38.70810  | 38.70810  | 38.70810  | 9177 | protein coding | soluble cytochrome b5 (transmembrane) member 11 (Foscof-Medl Synchro-Acc-Medl 18932976) |
| ENSRG000000013 | 115.81704  | 207.96250  | 186.16200  | 38.70810  | 38.70810   | 38.70810   | 38.70810  | 38.70810   | 38.70810  | 38.70810  | 38.70810  | 38.70810  | 38.70810  | 9178 | protein coding | soluble cytochrome b5 (transmembrane) member 12 (Foscof-Medl Synchro-Acc-Medl 18932976) |
| ENSRG000000014 | 115.81704  | 207.96250  | 186.16200  | 38.70810  | 38.70810   | 38.70810   | 38.70810  | 38.70810   | 38.70810  | 38.70810  | 38.70810  | 38.70810  | 38.70810  | 9179 | protein coding | soluble cytochrome b5 (transmembrane) member 13 (Foscof-Medl Synchro-Acc-Medl 18932976) |
| ENSRG000000015 | 115.81704  | 207.96250  | 186.16200  | 38.70810  | 38.70810   | 38.70810   | 38.70810  | 38.70810   | 38.70810  | 38.70810  | 38.70810  | 38.70810  | 38.70810  | 9180 | protein coding | soluble cytochrome b5 (transmembrane) member 14 (Foscof-Medl Synchro-Acc-Medl 18932976) |
| ENSRG000000016 | 115.81704  | 207.96250  | 186.16200  | 38.70810  | 38.70810   | 38.70810   | 38.70810  | 38.70810   | 38.70810  | 38.70810  | 38.70810  | 38.70810  | 38.70810  | 9181 | protein coding | soluble cytochrome b5 (transmembrane) member 15 (Foscof-Medl Synchro-Acc-Medl 18932976) |
| ENSRG          |            |            |            |           |            |            |           |            |           |           |           |           |           |      |                |                                                                                         |

[illegible]
